# Supplementary material
Source: publisher figshare collection journal article supplement (https://wiley.figshare.com/articles/dataset/_/6650921)
Supplement: Supplementary file 4 [file 1]

Title: Modeling the random effects covariance matrix for longitudinal data with covariates measurement error

Authors: Md Erfanul Hoque and Mahmoud Torabi

Emails: hoqueme@myumanitoba.ca  
Mahmoud.Torabi@umanitoba.ca

Software: R software, version: r/3.3.1

The code "Naive1\_Missspecified\_Error\_Distribution.R" contains the R code for Naive 1 under mis-specified error distribution and will provide the simulation outputs of Table 3 for Naive 1 (Section 5.1).
