# Supplementary material
Source: publisher figshare collection journal article supplement (https://wiley.figshare.com/articles/dataset/_/6650921)
Supplement: Supplementary file 7 [file 1]

Title: Modeling the random effects covariance matrix for longitudinal data with covariates measurement error

Authors: Md Erfanul Hoque and Mahmoud Torabi

Emails: hoqueme@myumanitoba.ca  
Mahmoud.Torabi@umanitoba.ca

Software: R software, version: r/3.3.1

The code "Simulation code\_Table 2\_Moderate.R" contains the R code for three approaches and will provide the simulation outputs of Table 2 under moderate error for 10 follow-ups (Section 5.1).

For producing the other simulation outputs one needs to change the value of  $\sigma^2$  (measurement error variation) and  $q$  (number of follow-ups).
