# Supplementary material
Source: publisher figshare collection journal article supplement (https://wiley.figshare.com/articles/dataset/_/6650921)
Supplement: Supplementary file 8 [file 1]

Rscript ParScript\_Model2-Nonstationary1.R  
Rscript ProposedMethod\_Nonstationary1.R
