# Supplementary material
Source: publisher figshare collection journal article supplement (https://wiley.figshare.com/articles/dataset/_/6650921)
Supplement: Supplementary file 9 [file 1]

Rscript ParScript\_Model3-Nonstationary2.R  
Rscript ProposedMethod\_Nonstationary2.R
