# Supplementary material
Source: publisher figshare collection journal article supplement (https://wiley.figshare.com/articles/dataset/_/6650921)
Supplement: Supplementary file 10 [file 1]

```
Rscript ParScript_Model1-AR2.R  
Rscript Proposed Method_AR2model.R
```
