# Supplementary material
Source: publisher figshare collection journal article supplement (https://wiley.figshare.com/articles/dataset/_/6650921)
Supplement: Supplementary file 12 [file 1]

| "id" | "followup" | "px_age"         | "bmi"            | "IHD_new" | "HBP" |
|------|------------|------------------|------------------|-----------|-------|
| 1    | 1          | 27.4140999315537 | 22.2399624633673 | 0         | 0     |
| 1    | 2          | 34.0396988364134 | 25.5400859256735 | 0         | 1     |
| 1    | 3          | 34.8829568788501 | 24.8226677816939 | 0         | 0     |
| 1    | 4          | 35.3812457221081 | 25.6835695544694 | 0         | 0     |
| 1    | 5          | 35.8685831622177 | 27.6923403576122 | 0         | 0     |
| 1    | 6          | 36.331279945243  | 25.8270531832653 | 0         | 0     |
| 1    | 7          | 36.8323066392882 | 26.400987698449  | 0         | 0     |
| 1    | 8          | 37.3442847364819 | 26.8314385848367 | 0         | 0     |
| 1    | 9          | 37.8151950718686 | 26.8314385848367 | 0         | 0     |
| 1    | 10         | 37.9219712525667 | 26.8314385848367 | 0         | 0     |
| 2    | 1          | 28.4955509924709 | 23.1724659298096 | 0         | 0     |
| 2    | 2          | 30.5790554414784 | 23.1724659298096 | 0         | 0     |
| 2    | 3          | 34.8720054757016 | 23.6874096171387 | 0         | 0     |
| 2    | 4          | 43.378507871321  | 27.2920154284424 | 0         | 0     |
| 2    | 5          | 46.403832991102  | 26.9487196368896 | 0         | 0     |
| 2    | 6          | 49.4264202600958 | 25.7471843664551 | 0         | 0     |
| 2    | 7          | 52.0793976728268 | 26.2621280537842 | 0         | 0     |
| 2    | 8          | 55.4113620807666 | 24.7172969917969 | 0         | 0     |
| 2    | 9          | 58.6858316221766 | 25.9188322622314 | 0         | 0     |
| 2    | 10         | 61.3689253935661 | 26.7770717411133 | 0         | 0     |
| 3    | 1          | 33.4182067077344 | 31.7780242754974 | 0         | 0     |
| 3    | 2          | 39.4360027378508 | 35.7312713145545 | 0         | 0     |
| 3    | 3          | 44.0219028062971 | 34.2107916841479 | 0         | 0     |
| 3    | 4          | 46.5817932922656 | 35.4271753884732 | 0         | 0     |
| 3    | 5          | 49.2977412731006 | 36.4915111297578 | 0         | 0     |
| 3    | 6          | 52.331279945243  | 35.2751274254325 | 0         | 0     |
| 3    | 7          | 55.2936344969199 | 32.2341681646194 | 0         | 0     |
| 3    | 8          | 58.3819301848049 | 36.4915111297578 | 0         | 0     |
| 3    | 9          | 58.4010951403149 | 36.4915111297578 | 0         | 0     |
| 3    | 10         | 61.7494866529774 | 33.754647795026  | 0         | 1     |
| 4    | 1          | 35.3620807665982 | 27.520681310359  | 0         | 0     |
| 4    | 2          | 36.9774127310062 | 27.976825199481  | 0         | 0     |
| 4    | 3          | 38.9787816563997 | 28.1288731625216 | 0         | 0     |
| 4    | 4          | 41.3305954825462 | 27.976825199481  | 0         | 0     |
| 4    | 5          | 43.8220396988364 | 27.976825199481  | 0         | 0     |
| 4    | 6          | 45.8562628336756 | 28.1288731625216 | 0         | 0     |
| 4    | 7          | 48.1779603011636 | 27.976825199481  | 0         | 0     |
| 4    | 8          | 50.1656399726215 | 27.6727292733997 | 0         | 0     |
| 4    | 9          | 52.1670088980151 | 27.520681310359  | 0         | 0     |
| 4    | 10         | 54.072553045859  | 27.064537421237  | 0         | 0     |
| 5    | 1          | 29.0841889117043 | 26.1140204408571 | 0         | 0     |
| 5    | 2          | 32.2327173169062 | 27.5488567288163 | 0         | 0     |
| 5    | 3          | 35.460643394935  | 27.2618894712245 | 0         | 0     |
| 5    | 4          | 38.4503764544832 | 27.8358239864082 | 0         | 0     |
| 5    | 5          | 38.8062970568104 | 27.9793076152041 | 0         | 0     |
| 5    | 6          | 39.296372347707  | 27.8358239864082 | 0         | 0     |
| 5    | 7          | 39.7809719370294 | 27.9793076152041 | 0         | 0     |
| 5    | 8          | 40.2546201232033 | 27.8358239864082 | 0         | 0     |
| 5    | 9          | 40.7337440109514 | 28.122791244     | 0         | 0     |
| 5    | 10         | 41.2128678986995 | 28.2662748727959 | 0         | 0     |
| 6    | 1          | 25.8343600273785 | 23.0559148894676 | 0         | 0     |
| 6    | 2          | 28.8925393566051 | 22.3777997456597 | 0         | 0     |
| 6    | 3          | 32.0191649555099 | 23.0559148894676 | 0         | 0     |

|    |    |                  |                  |   |   |
|----|----|------------------|------------------|---|---|
| 6  | 4  | 32.0219028062971 | 22.3777997456597 | 0 | 0 |
| 6  | 5  | 33.8726899383984 | 23.0559148894676 | 0 | 0 |
| 6  | 6  | 37.9137577002053 | 22.7846688319444 | 0 | 0 |
| 6  | 7  | 38.3162217659138 | 22.3777997456597 | 0 | 0 |
| 6  | 8  | 40.3696098562628 | 23.0559148894676 | 0 | 0 |
| 6  | 9  | 43.1321013004791 | 23.5984070045139 | 0 | 0 |
| 6  | 10 | 46.0396988364134 | 23.7340300332755 | 0 | 0 |
| 7  | 1  | 28.2464065708419 | 24.4075641778007 | 0 | 0 |
| 7  | 2  | 30.4120465434634 | 25.7268919711953 | 0 | 0 |
| 7  | 3  | 34.2039698836413 | 24.9352952951586 | 0 | 0 |
| 7  | 4  | 34.5598904859685 | 25.4630264125164 | 0 | 0 |
| 7  | 5  | 34.9924709103354 | 25.067228074498  | 0 | 0 |
| 7  | 6  | 37.9822039698836 | 24.4075641778007 | 0 | 0 |
| 7  | 7  | 41.4620123203285 | 24.2756313984613 | 0 | 0 |
| 7  | 8  | 43.8329911019849 | 23.2201691637455 | 0 | 0 |
| 7  | 9  | 46.1437371663244 | 23.7479002811034 | 0 | 0 |
| 7  | 10 | 48.8761122518823 | 23.2201691637455 | 0 | 0 |
| 8  | 1  | 25.4209445585216 | 22.3510505669766 | 0 | 0 |
| 8  | 2  | 32.0191649555099 | 22.0469546408953 | 0 | 0 |
| 8  | 3  | 33.0540725530459 | 23.2633383452206 | 0 | 0 |
| 8  | 4  | 37.7111567419576 | 22.5030985300173 | 0 | 0 |
| 8  | 5  | 42.3080082135524 | 22.0469546408953 | 0 | 0 |
| 8  | 6  | 45.3552361396304 | 21.5908107517734 | 0 | 0 |
| 8  | 7  | 48.9308692676249 | 22.199002603936  | 0 | 0 |
| 8  | 8  | 53.1006160164271 | 22.5030985300173 | 0 | 0 |
| 8  | 9  | 56.1889117043121 | 22.8071944560986 | 0 | 1 |
| 8  | 10 | 58.9514031485284 | 22.8071944560986 | 0 | 0 |
| 10 | 1  | 30.8336755646817 | 23.6747987513265 | 0 | 0 |
| 10 | 2  | 31.482546201232  | 25.5400859256735 | 0 | 0 |
| 10 | 3  | 32.788501026694  | 25.2531186680816 | 0 | 0 |
| 10 | 4  | 34.0177960301164 | 25.6835695544694 | 0 | 0 |
| 10 | 5  | 35.7481177275838 | 24.679184152898  | 0 | 0 |
| 10 | 6  | 35.9260780287474 | 24.679184152898  | 0 | 0 |
| 10 | 7  | 37.7084188911704 | 24.8226677816939 | 0 | 0 |
| 10 | 8  | 40               | 22.6704133497551 | 0 | 0 |
| 10 | 9  | 42.1245722108145 | 23.8182823801224 | 0 | 0 |
| 10 | 10 | 43.9288158795346 | 24.535700524102  | 0 | 0 |
| 12 | 1  | 32.3367556468172 | 23.5647814601928 | 1 | 0 |
| 12 | 2  | 33.4811772758385 | 24.048989298416  | 1 | 0 |
| 12 | 3  | 34.5379876796715 | 24.048989298416  | 1 | 0 |
| 12 | 4  | 35.4360027378508 | 25.6630154258264 | 1 | 0 |
| 12 | 5  | 42.715947980835  | 26.4700284895317 | 1 | 1 |
| 12 | 6  | 44.5147159479808 | 28.7296650679063 | 1 | 1 |
| 12 | 7  | 45.5633127994524 | 22.1121579455234 | 1 | 0 |
| 12 | 8  | 49.0239561943874 | 22.5963657837466 | 1 | 1 |
| 12 | 9  | 54.9295003422314 | 23.4033788474518 | 1 | 0 |
| 12 | 10 | 57.0485968514716 | 25.6630154258264 | 1 | 1 |
| 13 | 1  | 25.1526351813826 | 24.8226677816939 | 0 | 0 |
| 13 | 2  | 30.6611909650924 | 26.2575040696531 | 0 | 0 |
| 13 | 3  | 36.3285420944559 | 27.4053731000204 | 0 | 0 |
| 13 | 4  | 40.580424366872  | 27.1184058424286 | 0 | 0 |
| 13 | 5  | 43.6112251882272 | 27.4053731000204 | 0 | 0 |
| 13 | 6  | 46.6009582477755 | 27.9793076152041 | 0 | 0 |
| 13 | 7  | 49.3223819301848 | 26.5444713272449 | 0 | 1 |

|    |    |                  |                  |   |   |
|----|----|------------------|------------------|---|---|
| 13 | 8  | 52.2655715263518 | 24.9661514104898 | 0 | 0 |
| 13 | 9  | 55.8521560574949 | 26.6879549560408 | 0 | 0 |
| 13 | 10 | 56.1013004791239 | 27.1184058424286 | 0 | 0 |
| 14 | 1  | 26.4147843942505 | 25.8244180385675 | 0 | 0 |
| 14 | 2  | 27.3319644079398 | 25.3402102003444 | 0 | 0 |
| 14 | 3  | 28.1806981519507 | 26.3086258767906 | 0 | 0 |
| 14 | 4  | 30.5270362765229 | 25.8244180385675 | 0 | 0 |
| 14 | 5  | 31.0006844626968 | 25.9858206513085 | 0 | 0 |
| 14 | 6  | 33.3853524982888 | 25.8244180385675 | 0 | 0 |
| 14 | 7  | 34.444900752909  | 26.1472232640496 | 0 | 0 |
| 14 | 8  | 36.4134154688569 | 26.3086258767906 | 0 | 0 |
| 14 | 9  | 38.4010951403149 | 26.9542363277548 | 0 | 0 |
| 14 | 10 | 40.4134154688569 | 26.7928337150138 | 0 | 0 |
| 15 | 1  | 28.4188911704312 | 22.2399624633673 | 0 | 0 |
| 15 | 2  | 29.9247091033539 | 23.5313151225306 | 0 | 0 |
| 15 | 3  | 35.6714579055441 | 22.9573806073469 | 0 | 0 |
| 15 | 4  | 39.9233401779603 | 23.8182823801224 | 0 | 0 |
| 15 | 5  | 43.0855578370979 | 24.9661514104898 | 0 | 0 |
| 15 | 6  | 45.9219712525667 | 24.3922168953061 | 0 | 0 |
| 15 | 7  | 48.9993155373032 | 23.5313151225306 | 0 | 0 |
| 15 | 8  | 51.6522929500342 | 23.2443478649388 | 0 | 0 |
| 15 | 9  | 53.6892539356605 | 24.1052496377143 | 0 | 0 |
| 15 | 10 | 55.8302532511978 | 25.1096350392857 | 0 | 0 |
| 16 | 1  | 31.8384668035592 | 31.3066149114052 | 1 | 0 |
| 16 | 2  | 33.1252566735113 | 31.3066149114052 | 1 | 1 |
| 16 | 3  | 33.1307323750856 | 31.3066149114052 | 1 | 1 |
| 16 | 4  | 33.138945927447  | 31.3066149114052 | 1 | 0 |
| 16 | 5  | 33.4565366187543 | 28.0578152507877 | 1 | 0 |
| 16 | 6  | 33.492128678987  | 28.5008333863264 | 1 | 0 |
| 16 | 7  | 38.5681040383299 | 30.7159240640202 | 1 | 1 |
| 16 | 8  | 39.4496919917864 | 29.9775605047889 | 1 | 0 |
| 16 | 9  | 42.8829568788501 | 30.7159240640202 | 1 | 1 |
| 16 | 10 | 43.4688569472964 | 27.9101425389414 | 1 | 0 |
| 17 | 1  | 22.217659137577  | 24.2678321585796 | 0 | 0 |
| 17 | 2  | 27.2498288843258 | 21.8968370626265 | 0 | 0 |
| 17 | 3  | 29.4647501711157 | 24.4073024583416 | 0 | 0 |
| 17 | 4  | 30.5160848733744 | 24.2678321585796 | 0 | 0 |
| 17 | 5  | 32               | 24.6862430578655 | 0 | 0 |
| 17 | 6  | 34.3326488706366 | 24.2678321585796 | 0 | 0 |
| 17 | 7  | 39.0828199863107 | 23.4310103600079 | 0 | 0 |
| 17 | 8  | 41.8370978781656 | 24.6862430578655 | 0 | 0 |
| 17 | 9  | 44               | 24.9651836573894 | 0 | 0 |
| 17 | 10 | 51.8056125941136 | 26.4993569547709 | 0 | 1 |
| 18 | 1  | 21.9247091033539 | 19.9182831583261 | 0 | 0 |
| 18 | 2  | 27.7481177275838 | 21.286714825692  | 0 | 0 |
| 18 | 3  | 33.2539356605065 | 25.3920098277898 | 0 | 0 |
| 18 | 4  | 37.9192334017796 | 25.8481537169118 | 0 | 0 |
| 18 | 5  | 41.0869267624914 | 24.4797220495458 | 0 | 0 |
| 18 | 6  | 44.0848733744011 | 24.9358659386678 | 0 | 0 |
| 18 | 7  | 46.4996577686516 | 26.1522496429931 | 0 | 0 |
| 18 | 8  | 50.1930184804928 | 24.7838179756272 | 0 | 0 |
| 18 | 9  | 52.7419575633128 | 24.3276740865052 | 0 | 0 |
| 18 | 10 | 55.9233401779603 | 23.4153863082612 | 0 | 0 |
| 19 | 1  | 31.5865845311431 | 22.920291860706  | 0 | 0 |

|    |    |                  |                  |   |   |
|----|----|------------------|------------------|---|---|
| 19 | 2  | 33.8590006844627 | 23.7340300332755 | 0 | 0 |
| 19 | 3  | 41.7522245037645 | 24.1408991195602 | 0 | 0 |
| 19 | 4  | 43.9151266255989 | 24.5477682058449 | 0 | 1 |
| 19 | 5  | 45.8370978781656 | 24.4121451770833 | 0 | 0 |
| 19 | 6  | 48.7529089664613 | 24.6833912346065 | 0 | 0 |
| 19 | 7  | 51.7535934291581 | 23.5984070045139 | 0 | 0 |
| 19 | 8  | 54.7679671457906 | 23.7340300332755 | 0 | 0 |
| 19 | 9  | 57.8261464750171 | 24.1408991195602 | 0 | 0 |
| 19 | 10 | 60.6817248459959 | 23.5984070045139 | 0 | 0 |
| 20 | 1  | 34.1327857631759 | 26.1522496429931 | 0 | 0 |
| 20 | 2  | 36.8624229979466 | 26.7604414951557 | 0 | 0 |
| 20 | 3  | 43.2826830937714 | 26.7604414951557 | 0 | 0 |
| 20 | 4  | 47.7782340862423 | 25.5440577908304 | 0 | 0 |
| 20 | 5  | 50.3600273785079 | 25.8481537169118 | 0 | 0 |
| 20 | 6  | 53.1115674195756 | 26.1522496429931 | 0 | 0 |
| 20 | 7  | 55.3593429158111 | 26.1522496429931 | 0 | 0 |
| 20 | 8  | 58.0588637919233 | 25.8481537169118 | 0 | 1 |
| 20 | 9  | 61.0431211498973 | 26.1522496429931 | 0 | 1 |
| 20 | 10 | 65.1635865845311 | 26.6083935321151 | 0 | 1 |
| 21 | 1  | 34.7488021902806 | 19.9365852279514 | 0 | 0 |
| 21 | 2  | 38.7488021902806 | 20.7503234005208 | 0 | 0 |
| 21 | 3  | 41.8891170431211 | 20.6147003717593 | 0 | 0 |
| 21 | 4  | 45.160848733744  | 21.4284385443287 | 0 | 0 |
| 21 | 5  | 48.2436687200548 | 21.970930659375  | 0 | 0 |
| 21 | 6  | 51.3292265571526 | 22.3777997456597 | 0 | 1 |
| 21 | 7  | 54.1629021218344 | 22.1065536881366 | 0 | 0 |
| 21 | 8  | 57.5797399041752 | 21.970930659375  | 0 | 0 |
| 21 | 9  | 60.8158795345654 | 21.021569458044  | 0 | 1 |
| 21 | 10 | 62.9295003422314 | 18.7159779690972 | 0 | 0 |
| 22 | 1  | 24.9993155373032 | 25.8423956073736 | 1 | 0 |
| 22 | 2  | 35.8357289527721 | 27.2519808223212 | 1 | 0 |
| 22 | 3  | 40.082135523614  | 28.5049454578302 | 1 | 0 |
| 22 | 4  | 42.7515400410678 | 28.5049454578302 | 1 | 0 |
| 22 | 5  | 45.9137577002053 | 28.191704298953  | 1 | 0 |
| 22 | 6  | 49.5003422313484 | 28.9748071961461 | 1 | 0 |
| 22 | 7  | 51.895961670089  | 25.5291544484963 | 1 | 1 |
| 22 | 8  | 55.0417522245038 | 28.3483248783916 | 1 | 0 |
| 22 | 9  | 57.8288843258042 | 27.2519808223212 | 1 | 0 |
| 22 | 10 | 59.5509924709103 | 26.7821190840053 | 1 | 0 |
| 23 | 1  | 35.5865845311431 | 22.8892703361689 | 1 | 0 |
| 23 | 2  | 41.5879534565366 | 24.5136701664776 | 1 | 0 |
| 23 | 3  | 46.1683778234086 | 25.3997064375551 | 1 | 0 |
| 23 | 4  | 48.7501711156742 | 24.5136701664776 | 1 | 0 |
| 23 | 5  | 51.501711156742  | 25.1043610138626 | 1 | 1 |
| 23 | 6  | 54.6721423682409 | 25.1043610138626 | 1 | 1 |
| 23 | 7  | 54.7488021902806 | 25.1043610138626 | 1 | 0 |
| 23 | 8  | 57.4455852156057 | 26.4334154204789 | 1 | 1 |
| 23 | 9  | 60.6160164271047 | 26.2857427086326 | 1 | 0 |
| 23 | 10 | 61.2977412731006 | 24.0706520309389 | 1 | 1 |
| 24 | 1  | 35.8056125941136 | 24.4073024583416 | 0 | 0 |
| 24 | 2  | 36.9281314168378 | 23.152069760484  | 0 | 0 |
| 24 | 3  | 38.7898699520876 | 24.5467727581036 | 0 | 0 |
| 24 | 4  | 40.7063655030801 | 24.8257133576275 | 0 | 0 |
| 24 | 5  | 42.6639288158795 | 25.5230648564372 | 0 | 0 |

|    |    |                  |                  |   |
|----|----|------------------|------------------|---|
| 24 | 6  | 44.6351813826146 | 24.6862430578655 | 0 |
| 24 | 7  | 47.1950718685832 | 24.5467727581036 | 0 |
| 24 | 8  | 49.2484599589322 | 24.4073024583416 | 0 |
| 24 | 9  | 51.2197125256674 | 25.3835945566753 | 0 |
| 24 | 10 | 53.09787816564   | 25.3835945566753 | 0 |
| 25 | 1  | 27.4661190965092 | 23.9617660089184 | 0 |
| 25 | 2  | 30.0013689253936 | 23.8182823801224 | 0 |
| 25 | 3  | 31.129363449692  | 23.5313151225306 | 0 |
| 25 | 4  | 32.911704312115  | 24.3922168953061 | 0 |
| 25 | 5  | 34.9185489390828 | 24.3922168953061 | 0 |
| 25 | 6  | 36.9062286105407 | 23.2443478649388 | 0 |
| 25 | 7  | 39.0006844626968 | 23.9617660089184 | 0 |
| 25 | 8  | 41.2046543463381 | 23.9617660089184 | 0 |
| 25 | 9  | 43.1676933607118 | 25.6835695544694 | 0 |
| 25 | 10 | 44.7337440109514 | 25.3966022968776 | 0 |
| 26 | 1  | 45.0869267624914 | 31.3218803863754 | 0 |
| 26 | 2  | 46.9678302532512 | 32.2341681646194 | 0 |
| 26 | 3  | 52.1670088980151 | 32.2341681646194 | 0 |
| 26 | 4  | 56.7501711156742 | 29.3452568668469 | 0 |
| 26 | 5  | 57.5797399041752 | 28.2809211255623 | 0 |
| 26 | 6  | 60.5831622176591 | 29.1932089038062 | 0 |
| 26 | 7  | 62.9295003422314 | 29.4973048298875 | 0 |
| 26 | 8  | 63.7289527720739 | 28.2809211255623 | 0 |
| 26 | 9  | 64.2162902121834 | 28.2809211255623 | 0 |
| 26 | 10 | 66.3353867214237 | 27.064537421237  | 0 |
| 28 | 1  | 34.4147843942505 | 23.1008642361429 | 0 |
| 28 | 2  | 35.0006844626968 | 23.6747987513265 | 0 |
| 28 | 3  | 36.3449691991786 | 23.6747987513265 | 0 |
| 28 | 4  | 37.5195071868583 | 24.3922168953061 | 0 |
| 28 | 5  | 39.2635181382615 | 25.3966022968776 | 0 |
| 28 | 6  | 39.4962354551677 | 25.5400859256735 | 0 |
| 28 | 7  | 41.1416837782341 | 23.9617660089184 | 0 |
| 28 | 8  | 42.0041067761807 | 24.3922168953061 | 0 |
| 28 | 9  | 42.1629021218344 | 23.9617660089184 | 0 |
| 28 | 10 | 42.9952087611225 | 25.8270531832653 | 0 |
| 29 | 1  | 31.3538672142368 | 23.1846157598614 | 0 |
| 29 | 2  | 36.9993155373032 | 25.3997064375551 | 0 |
| 29 | 3  | 42.4202600958248 | 23.9229793190926 | 0 |
| 29 | 4  | 46.590006844627  | 24.5136701664776 | 0 |
| 29 | 5  | 49.6673511293634 | 26.2857427086326 | 0 |
| 29 | 6  | 52.7501711156742 | 25.3997064375551 | 0 |
| 29 | 7  | 55.6659822039699 | 23.6276338954001 | 0 |
| 29 | 8  | 59.3730321697468 | 21.5602159295526 | 0 |
| 29 | 9  | 65.7111567419576 | 23.9229793190926 | 0 |
| 29 | 10 | 66.0369609856263 | 24.9566883020164 | 0 |
| 32 | 1  | 40.6652977412731 | 24.8090155901701 | 0 |
| 32 | 2  | 40.8651608487337 | 25.8427245730939 | 0 |
| 32 | 3  | 47.0828199863107 | 25.2520337257089 | 0 |
| 32 | 4  | 47.9945242984257 | 25.1043610138626 | 0 |
| 32 | 5  | 50.5407255304586 | 25.3997064375551 | 0 |
| 32 | 6  | 50.9979466119097 | 24.9566883020164 | 0 |
| 32 | 7  | 52.0766598220397 | 23.9229793190926 | 0 |
| 32 | 8  | 55.3319644079398 | 24.2183247427851 | 0 |
| 32 | 9  | 57.9986310746064 | 23.6276338954001 | 0 |

|    |    |                  |                  |   |
|----|----|------------------|------------------|---|
| 32 | 10 | 60.9171800136893 | 25.1043610138626 | 0 |
| 33 | 1  | 31.419575633128  | 23.5647814601928 | 0 |
| 33 | 2  | 32.5722108145106 | 23.8875866856749 | 0 |
| 33 | 3  | 37.1663244353183 | 24.210391911157  | 0 |
| 33 | 4  | 41.9219712525667 | 25.5016128130854 | 0 |
| 33 | 5  | 46.0013689253936 | 25.5016128130854 | 0 |
| 33 | 6  | 48.7529089664613 | 25.8244180385675 | 0 |
| 33 | 7  | 51.6769336071184 | 25.5016128130854 | 1 |
| 33 | 8  | 54.7652292950034 | 25.5016128130854 | 1 |
| 33 | 9  | 57.7713894592745 | 23.4033788474518 | 1 |
| 33 | 10 | 57.9466119096509 | 24.3717945238981 | 0 |
| 34 | 1  | 32.6078028747433 | 23.1104018623083 | 0 |
| 34 | 2  | 33.3305954825462 | 22.8536196193937 | 0 |
| 34 | 3  | 35.5865845311431 | 23.1104018623083 | 0 |
| 34 | 4  | 36.2737850787132 | 23.3671841052228 | 0 |
| 34 | 5  | 38.6858316221766 | 23.7523574695946 | 0 |
| 34 | 6  | 38.8035592060233 | 23.2387929837655 | 0 |
| 34 | 7  | 42.3545516769336 | 23.2387929837655 | 0 |
| 34 | 8  | 45.2347707049966 | 23.7523574695946 | 0 |
| 34 | 9  | 47.1895961670089 | 24.2659219554237 | 0 |
| 34 | 10 | 49.1690622861054 | 23.2387929837655 | 0 |
| 35 | 1  | 34.0835044490075 | 25.5400859256735 | 0 |
| 35 | 2  | 39.9561943874059 | 26.400987698449  | 0 |
| 35 | 3  | 44.3504449007529 | 26.2575040696531 | 1 |
| 35 | 4  | 47.3976728268309 | 26.5444713272449 | 0 |
| 35 | 5  | 50.9158110882957 | 26.9749222136327 | 0 |
| 35 | 6  | 53.9520876112252 | 25.3966022968776 | 0 |
| 35 | 7  | 57.1964407939767 | 25.9705368120612 | 0 |
| 35 | 8  | 58.7679671457906 | 24.9661514104898 | 1 |
| 35 | 9  | 58.9623545516769 | 26.1140204408571 | 1 |
| 35 | 10 | 61.2867898699521 | 25.3966022968776 | 1 |
| 37 | 1  | 30.6639288158795 | 26.1522496429931 | 0 |
| 37 | 2  | 33.4976043805613 | 28.5850170516436 | 0 |
| 37 | 3  | 39.5811088295688 | 29.9534487190095 | 1 |
| 37 | 4  | 44.580424366872  | 28.2809211255623 | 0 |
| 37 | 5  | 47.6632443531828 | 27.3686333473183 | 0 |
| 37 | 6  | 50.2505133470226 | 27.3686333473183 | 0 |
| 37 | 7  | 54.4093086926762 | 32.6903120537414 | 1 |
| 37 | 8  | 59.0362765229295 | 31.9300722385381 | 1 |
| 37 | 9  | 62.0451745379877 | 31.4739283494161 | 1 |
| 37 | 10 | 64.498288843258  | 34.0587437211073 | 0 |
| 39 | 1  | 32.3340177960301 | 25.9858206513085 | 0 |
| 39 | 2  | 40.3340177960301 | 27.438444165978  | 0 |
| 39 | 3  | 44.4188911704312 | 27.2770415532369 | 0 |
| 39 | 4  | 48.5859000684463 | 27.1156389404959 | 0 |
| 39 | 5  | 52.0082135523614 | 26.7928337150138 | 0 |
| 39 | 6  | 55.0499657768652 | 23.0805736219697 | 0 |
| 39 | 7  | 57.8836413415469 | 23.8875866856749 | 0 |
| 39 | 8  | 60.7556468172485 | 23.5647814601928 | 1 |
| 39 | 9  | 63.8247775496235 | 22.9191710092287 | 1 |
| 39 | 10 | 65.80424366872   | 22.9191710092287 | 1 |
| 40 | 1  | 21.4893908281999 | 21.4387627887327 | 0 |
| 40 | 2  | 25.4592744695414 | 23.5674342713019 | 0 |
| 40 | 3  | 25.9986310746064 | 22.8071944560986 | 0 |

|    |    |                  |                  |   |   |
|----|----|------------------|------------------|---|---|
| 40 | 4  | 28.0876112251882 | 23.1112903821799 | 0 | 0 |
| 40 | 5  | 28.8459958932238 | 22.5030985300173 | 0 | 0 |
| 40 | 6  | 30.2505133470226 | 23.2633383452206 | 0 | 0 |
| 40 | 7  | 32.041067761807  | 23.5674342713019 | 0 | 0 |
| 40 | 8  | 35.1676933607118 | 23.1112903821799 | 0 | 0 |
| 40 | 9  | 39.9151266255989 | 22.8071944560986 | 0 | 0 |
| 40 | 10 | 42.2669404517454 | 22.8071944560986 | 0 | 0 |
| 41 | 1  | 31.5811088295688 | 25.7268919711953 | 0 | 1 |
| 41 | 2  | 37.9192334017796 | 24.2756313984613 | 0 | 0 |
| 41 | 3  | 42.2477754962355 | 26.5184886472321 | 0 | 1 |
| 41 | 4  | 45.3333333333333 | 25.067228074498  | 0 | 0 |
| 41 | 5  | 48.2464065708419 | 25.067228074498  | 0 | 1 |
| 41 | 6  | 51.1375770020534 | 27.1781525439294 | 0 | 1 |
| 41 | 7  | 54.8199863107461 | 26.6504214265716 | 0 | 1 |
| 41 | 8  | 57.8590006844627 | 25.1991608538375 | 0 | 1 |
| 41 | 9  | 58.7816563997262 | 24.5394969571402 | 0 | 0 |
| 41 | 10 | 59.5318275154004 | 23.8798330604429 | 0 | 1 |
| 42 | 1  | 28.5010266940452 | 21.5640615730903 | 0 | 0 |
| 42 | 2  | 29.3196440793977 | 21.1571924868056 | 0 | 0 |
| 42 | 3  | 30.5242984257358 | 21.6996846018519 | 0 | 0 |
| 42 | 4  | 30.757015742642  | 21.4284385443287 | 0 | 0 |
| 42 | 5  | 32.6680355920602 | 22.5134227744213 | 0 | 0 |
| 42 | 6  | 34.5653661875428 | 23.0559148894676 | 0 | 0 |
| 42 | 7  | 36.6023271731691 | 21.2928155155671 | 0 | 0 |
| 42 | 8  | 38.5845311430527 | 22.920291860706  | 0 | 0 |
| 42 | 9  | 40.6652977412731 | 24.4121451770833 | 0 | 0 |
| 42 | 10 | 42.7515400410678 | 23.5984070045139 | 0 | 0 |
| 43 | 1  | 26.9240246406571 | 25.5400859256735 | 0 | 0 |
| 43 | 2  | 28.6707734428474 | 25.5400859256735 | 0 | 0 |
| 43 | 3  | 30.2477754962355 | 26.1140204408571 | 0 | 0 |
| 43 | 4  | 34.92128678987   | 25.8270531832653 | 0 | 0 |
| 43 | 5  | 36.4188911704312 | 25.8270531832653 | 0 | 0 |
| 43 | 6  | 40               | 26.2575040696531 | 0 | 0 |
| 43 | 7  | 43.1950718685832 | 27.4053731000204 | 0 | 0 |
| 43 | 8  | 45.9219712525667 | 25.5400859256735 | 0 | 0 |
| 43 | 9  | 49.0841889117043 | 20.8051261754082 | 0 | 0 |
| 43 | 10 | 51.6960985626283 | 26.1140204408571 | 0 | 0 |
| 44 | 1  | 26.9158110882957 | 22.1509067769376 | 0 | 0 |
| 44 | 2  | 30.9158110882957 | 22.7415976243226 | 0 | 0 |
| 44 | 3  | 33.1498973305955 | 23.3322884717076 | 0 | 0 |
| 44 | 4  | 35.2525667351129 | 24.2183247427851 | 0 | 0 |
| 44 | 5  | 38.9623545516769 | 26.5810881323251 | 0 | 0 |
| 44 | 6  | 39.0444900752909 | 26.2857427086326 | 0 | 0 |
| 44 | 7  | 40               | 26.4334154204789 | 0 | 0 |
| 44 | 8  | 40.9308692676249 | 25.6950518612476 | 0 | 0 |
| 44 | 9  | 42.8720054757016 | 25.2520337257089 | 0 | 0 |
| 44 | 10 | 43.9151266255989 | 23.9229793190926 | 0 | 0 |
| 45 | 1  | 28.8377823408624 | 20.2311916602245 | 0 | 0 |
| 45 | 2  | 30.4558521560575 | 20.6616425466122 | 0 | 0 |
| 45 | 3  | 35.2498288843258 | 20.9486098042041 | 0 | 0 |
| 45 | 4  | 39.9206023271732 | 21.5225443193878 | 0 | 0 |
| 45 | 5  | 44.0848733744011 | 22.6704133497551 | 0 | 0 |
| 45 | 6  | 46.92128678987   | 23.3878314937347 | 0 | 0 |
| 45 | 7  | 49.7522245037645 | 22.6704133497551 | 0 | 0 |

|    |    |                  |                  |   |   |
|----|----|------------------|------------------|---|---|
| 45 | 8  | 53.0376454483231 | 22.9573806073469 | 0 | 0 |
| 45 | 9  | 56.1752224503765 | 22.3834460921633 | 0 | 0 |
| 45 | 10 | 59.0554414784394 | 22.3834460921633 | 0 | 0 |
| 46 | 1  | 28               | 24.3276740865052 | 0 | 0 |
| 46 | 2  | 30.8911704312115 | 25.2399618647491 | 0 | 0 |
| 46 | 3  | 33.3360711841205 | 24.7838179756272 | 0 | 0 |
| 46 | 4  | 34.2505133470226 | 25.5440577908304 | 0 | 0 |
| 46 | 5  | 37.8343600273785 | 23.7194822343426 | 0 | 0 |
| 46 | 6  | 38.6201232032854 | 23.7194822343426 | 0 | 0 |
| 46 | 7  | 42.0013689253936 | 24.6317700125865 | 0 | 0 |
| 46 | 8  | 43.813826146475  | 24.3276740865052 | 0 | 0 |
| 46 | 9  | 44.082135523614  | 24.9358659386678 | 0 | 0 |
| 46 | 10 | 45.7494866529774 | 24.3276740865052 | 0 | 0 |
| 47 | 1  | 24.2518822724162 | 22.5030985300173 | 0 | 0 |
| 47 | 2  | 30.5845311430527 | 22.8071944560986 | 0 | 0 |
| 47 | 3  | 35.8384668035592 | 24.3276740865052 | 0 | 0 |
| 47 | 4  | 39.9233401779603 | 26.1522496429931 | 0 | 0 |
| 47 | 5  | 43.0855578370979 | 27.064537421237  | 0 | 0 |
| 47 | 6  | 45.9986310746064 | 25.2399618647491 | 0 | 0 |
| 47 | 7  | 48.9226557152635 | 26.7604414951557 | 0 | 0 |
| 47 | 8  | 49.1663244353183 | 28.8891129777249 | 0 | 0 |
| 47 | 9  | 51.0006844626968 | 27.3686333473183 | 0 | 0 |
| 47 | 10 | 53.7056810403833 | 26.3042976060337 | 0 | 0 |
| 48 | 1  | 29.8343600273785 | 24.9026721307418 | 0 | 0 |
| 48 | 2  | 31.6906228610541 | 25.2159132896191 | 0 | 0 |
| 48 | 3  | 37.2539356605065 | 25.9990161868122 | 0 | 0 |
| 48 | 4  | 41.7494866529774 | 24.5894309718646 | 0 | 0 |
| 48 | 5  | 44.331279945243  | 23.4930869157942 | 0 | 0 |
| 48 | 6  | 47.4140999315537 | 24.2761898129873 | 0 | 0 |
| 48 | 7  | 50.0013689253936 | 24.2761898129873 | 0 | 0 |
| 48 | 8  | 53.0075290896646 | 22.709984018601  | 0 | 0 |
| 48 | 9  | 56.1396303901437 | 25.0592927101804 | 0 | 0 |
| 48 | 10 | 59.4058863791923 | 23.1798457569169 | 0 | 0 |
| 49 | 1  | 32.3696098562628 | 22.5269297209592 | 0 | 0 |
| 49 | 2  | 34.6721423682409 | 23.3878314937347 | 0 | 0 |
| 49 | 3  | 35.4360027378508 | 24.3922168953061 | 0 | 0 |
| 49 | 4  | 39.3347022587269 | 25.8270531832653 | 0 | 0 |
| 49 | 5  | 41.3251197809719 | 26.6879549560408 | 0 | 0 |
| 49 | 6  | 41.9876796714579 | 26.8314385848367 | 0 | 0 |
| 49 | 7  | 44.0657084188912 | 27.4053731000204 | 0 | 0 |
| 49 | 8  | 45.4209445585216 | 28.2662748727959 | 0 | 0 |
| 49 | 9  | 48.9171800136893 | 28.8402093879796 | 0 | 0 |
| 49 | 10 | 53.3360711841205 | 26.9749222136327 | 0 | 0 |
| 50 | 1  | 30.5051334702259 | 20.6416043647689 | 1 | 0 |
| 50 | 2  | 36.3340177960301 | 21.1994855638167 | 1 | 0 |
| 50 | 3  | 40.9226557152635 | 20.9205449642928 | 1 | 0 |
| 50 | 4  | 45.1690622861054 | 20.9205449642928 | 1 | 1 |
| 50 | 5  | 48.3340177960301 | 22.0363073623884 | 1 | 1 |
| 50 | 6  | 51.3347022587269 | 21.1994855638167 | 1 | 1 |
| 50 | 7  | 54.9787816563997 | 20.6416043647689 | 1 | 1 |
| 50 | 8  | 58.5790554414784 | 22.3152479619123 | 1 | 1 |
| 50 | 9  | 60.8432580424367 | 20.9205449642928 | 1 | 1 |
| 50 | 10 | 71.4332648870637 | 20.9205449642928 | 1 | 0 |
| 51 | 1  | 30.6091718001369 | 25.5473791494014 | 0 | 0 |



|    |    |                  |                  |   |   |
|----|----|------------------|------------------|---|---|
| 51 | 2  | 33.5249828884326 | 24.3659974546314 | 0 | 0 |
| 51 | 3  | 39.8603696098563 | 24.9566883020164 | 0 | 1 |
| 51 | 4  | 44.7748117727584 | 23.6276338954001 | 0 | 1 |
| 51 | 5  | 47.4414784394251 | 25.1043610138626 | 0 | 1 |
| 51 | 6  | 50.113620807666  | 23.3322884717076 | 0 | 1 |
| 51 | 7  | 54.0177960301164 | 24.6613428783239 | 0 | 0 |
| 51 | 8  | 57.9466119096509 | 24.5136701664776 | 0 | 0 |
| 51 | 9  | 62.1382614647502 | 24.8090155901701 | 0 | 1 |
| 51 | 10 | 65.0759753593429 | 25.3997064375551 | 0 | 1 |
| 53 | 1  | 31.3347022587269 | 26.2857427086326 | 0 | 0 |
| 53 | 2  | 35.7481177275838 | 29.2391969455577 | 0 | 0 |
| 53 | 3  | 36.3394934976044 | 28.7961788100189 | 0 | 0 |
| 53 | 4  | 37.6728268309377 | 28.7961788100189 | 0 | 0 |
| 53 | 5  | 38.7734428473648 | 29.9775605047889 | 0 | 0 |
| 53 | 6  | 42.0862422997947 | 30.7159240640202 | 0 | 0 |
| 53 | 7  | 44.5037645448323 | 31.0112694877127 | 0 | 0 |
| 53 | 8  | 46.611909650924  | 31.7496330469439 | 0 | 0 |
| 53 | 9  | 48.1670088980151 | 30.4205786403277 | 0 | 0 |
| 53 | 10 | 50.5817932922656 | 31.6019603350977 | 0 | 0 |
| 54 | 1  | 28.0164271047228 | 23.7479002811034 | 0 | 0 |
| 54 | 2  | 29.0020533880903 | 23.4840347224245 | 0 | 0 |
| 54 | 3  | 30.1190965092402 | 25.5949591918559 | 0 | 0 |
| 54 | 4  | 32.1341546885695 | 22.9563036050666 | 0 | 0 |
| 54 | 5  | 34.5817932922656 | 24.8033625158191 | 0 | 0 |
| 54 | 6  | 36.0985626283368 | 25.7268919711953 | 0 | 0 |
| 54 | 7  | 36.3011635865845 | 25.7268919711953 | 0 | 0 |
| 54 | 8  | 39.6659822039699 | 25.5949591918559 | 0 | 0 |
| 54 | 9  | 42.6666666666667 | 25.5949591918559 | 0 | 0 |
| 54 | 10 | 45.4154688569473 | 26.6504214265716 | 0 | 0 |
| 55 | 1  | 31.5811088295688 | 25.9903972849401 | 0 | 0 |
| 55 | 2  | 32.1341546885695 | 25.5473791494014 | 0 | 0 |
| 55 | 3  | 34.6858316221766 | 27.3194516915564 | 0 | 0 |
| 55 | 4  | 36.2518822724162 | 26.5810881323251 | 0 | 0 |
| 55 | 5  | 37.1882272416153 | 27.0241062678639 | 0 | 0 |
| 55 | 6  | 39.564681724846  | 26.2857427086326 | 0 | 0 |
| 55 | 7  | 43.0006844626968 | 25.6950518612476 | 0 | 0 |
| 55 | 8  | 45.0595482546201 | 27.1717789797101 | 0 | 0 |
| 55 | 9  | 47.0006844626968 | 27.3194516915564 | 0 | 0 |
| 55 | 10 | 49.0814510609172 | 26.4334154204789 | 0 | 0 |
| 56 | 1  | 24.0766598220397 | 23.8875866856749 | 0 | 0 |
| 56 | 2  | 29.9164955509925 | 26.7928337150138 | 0 | 1 |
| 56 | 3  | 30.507871321013  | 25.8244180385675 | 0 | 1 |
| 56 | 4  | 36.3668720054757 | 29.0524702933884 | 0 | 1 |
| 56 | 5  | 36.7337440109514 | 29.0524702933884 | 0 | 0 |
| 56 | 6  | 41.7467488021903 | 25.0174049748623 | 0 | 0 |
| 56 | 7  | 46.0835044490075 | 27.7612493914601 | 0 | 0 |
| 56 | 8  | 47.8329911019849 | 24.048989298416  | 0 | 0 |
| 56 | 9  | 50.5927446954141 | 27.438444165978  | 0 | 0 |
| 56 | 10 | 53.1225188227242 | 25.5016128130854 | 0 | 0 |
| 59 | 1  | 32.580424366872  | 23.1798457569169 | 0 | 0 |
| 59 | 2  | 38.7460643394935 | 23.8063280746714 | 0 | 0 |
| 59 | 3  | 43.4962354551677 | 23.4930869157942 | 0 | 0 |
| 59 | 4  | 47.5811088295688 | 23.4930869157942 | 0 | 0 |
| 59 | 5  | 50.4941820670773 | 25.0592927101804 | 0 | 0 |

|    |    |                  |                  |   |   |
|----|----|------------------|------------------|---|---|
| 59 | 6  | 53.1663244353183 | 24.7460515513032 | 0 | 1 |
| 59 | 7  | 56.186173853525  | 25.685775027935  | 0 | 1 |
| 59 | 8  | 59.3237508555784 | 25.9990161868122 | 0 | 1 |
| 59 | 9  | 63.4113620807666 | 26.1556367662508 | 0 | 1 |
| 59 | 10 | 66.2861054072553 | 26.938739663444  | 0 | 1 |
| 60 | 1  | 29.5441478439425 | 21.5050430323325 | 0 | 0 |
| 60 | 2  | 31.2498288843258 | 20.3176480182774 | 0 | 0 |
| 60 | 3  | 32.2464065708419 | 21.7689085910114 | 0 | 0 |
| 60 | 4  | 33.223819301848  | 21.5050430323325 | 0 | 0 |
| 60 | 5  | 35.2662559890486 | 21.3731102529931 | 0 | 0 |
| 60 | 6  | 35.668720054757  | 21.9008413703509 | 0 | 0 |
| 60 | 7  | 37.9767282683094 | 23.352101943085  | 0 | 0 |
| 60 | 8  | 38.4722792607803 | 23.6159675017639 | 0 | 0 |
| 60 | 9  | 41.1663244353183 | 24.4075641778007 | 0 | 0 |
| 60 | 10 | 44.4626967830253 | 24.1436986191218 | 0 | 0 |
| 61 | 1  | 29.8343600273785 | 22.1509067769376 | 0 | 0 |
| 61 | 2  | 31.6878850102669 | 22.8892703361689 | 0 | 0 |
| 61 | 3  | 37.0020533880903 | 22.4462522006301 | 0 | 0 |
| 61 | 4  | 41.2484599589322 | 24.8090155901701 | 0 | 0 |
| 61 | 5  | 44.249144421629  | 23.6276338954001 | 0 | 0 |
| 61 | 6  | 47.0006844626968 | 24.6613428783239 | 0 | 0 |
| 61 | 7  | 50.4996577686516 | 23.6276338954001 | 0 | 0 |
| 61 | 8  | 53.1526351813826 | 24.0706520309389 | 0 | 0 |
| 61 | 9  | 56.2765229295003 | 24.3659974546314 | 0 | 0 |
| 61 | 10 | 57.3524982888433 | 23.9229793190926 | 0 | 0 |
| 62 | 1  | 28.6652977412731 | 23.152069760484  | 0 | 0 |
| 62 | 2  | 29.160848733744  | 23.5704806597699 | 0 | 0 |
| 62 | 3  | 31.3127994524298 | 23.9888915590557 | 0 | 0 |
| 62 | 4  | 33.5824777549624 | 23.9888915590557 | 0 | 0 |
| 62 | 5  | 33.6153319644079 | 24.4073024583416 | 0 | 0 |
| 62 | 6  | 33.9849418206708 | 24.2678321585796 | 0 | 0 |
| 62 | 7  | 35.958932238193  | 24.2678321585796 | 0 | 0 |
| 62 | 8  | 37.82340862423   | 24.9651836573894 | 0 | 0 |
| 62 | 9  | 38.7488021902806 | 24.8257133576275 | 0 | 0 |
| 62 | 10 | 40.9089664613279 | 24.6862430578655 | 0 | 0 |
| 63 | 1  | 30.9185489390828 | 23.8715301973832 | 0 | 0 |
| 63 | 2  | 31.9726214921287 | 24.0235781604239 | 0 | 0 |
| 63 | 3  | 32.5037645448323 | 23.7194822343426 | 0 | 0 |
| 63 | 4  | 33.4948665297741 | 24.9358659386678 | 0 | 0 |
| 63 | 5  | 34.6748802190281 | 23.4153863082612 | 0 | 0 |
| 63 | 6  | 36               | 23.7194822343426 | 0 | 0 |
| 63 | 7  | 36.9691991786448 | 25.0879139017085 | 0 | 1 |
| 63 | 8  | 38.8720054757016 | 25.6961057538711 | 0 | 0 |
| 63 | 9  | 39.6632443531828 | 26.6083935321151 | 0 | 0 |
| 63 | 10 | 40.9171800136893 | 27.3686333473183 | 0 | 0 |
| 64 | 1  | 28.9993155373032 | 21.457019383092  | 1 | 0 |
| 64 | 2  | 34.4120465434634 | 25.5291544484963 | 1 | 0 |
| 64 | 3  | 39.4962354551677 | 26.938739663444  | 1 | 0 |
| 64 | 4  | 43.1622176591376 | 27.8784631400757 | 1 | 0 |
| 64 | 5  | 45.9137577002053 | 26.6254985045667 | 1 | 0 |
| 64 | 6  | 49.160848733744  | 27.7218425606371 | 1 | 0 |
| 64 | 7  | 51.8494182067077 | 28.3483248783916 | 1 | 0 |
| 64 | 8  | 55.62765229295   | 28.3483248783916 | 1 | 0 |
| 64 | 9  | 57.8261464750171 | 24.5894309718646 | 1 | 0 |

|    |    |                  |                  |   |   |
|----|----|------------------|------------------|---|---|
| 64 | 10 | 63.1841204654346 | 24.7460515513032 | 1 | 0 |
| 65 | 1  | 27.9151266255989 | 20.4790773429977 | 0 | 0 |
| 65 | 2  | 28.3696098562628 | 20.3434543142361 | 0 | 0 |
| 65 | 3  | 30.9568788501027 | 20.3434543142361 | 0 | 0 |
| 65 | 4  | 32.7775496235455 | 20.3434543142361 | 0 | 0 |
| 65 | 5  | 33.6673511293634 | 19.5297161416667 | 0 | 0 |
| 65 | 6  | 35.9151266255989 | 21.021569458044  | 0 | 0 |
| 65 | 7  | 41.3333333333333 | 21.6996846018519 | 0 | 0 |
| 65 | 8  | 44.3340177960301 | 23.0559148894676 | 0 | 0 |
| 65 | 9  | 47.0828199863107 | 21.6996846018519 | 0 | 0 |
| 65 | 10 | 52.6160164271047 | 22.5134227744213 | 0 | 0 |
| 67 | 1  | 33.2457221081451 | 21.5225443193878 | 0 | 0 |
| 67 | 2  | 39.3292265571526 | 20.2311916602245 | 0 | 0 |
| 67 | 3  | 44               | 21.2355770617959 | 0 | 0 |
| 67 | 4  | 48.0793976728268 | 21.6660279481837 | 0 | 0 |
| 67 | 5  | 50.8309377138946 | 21.6660279481837 | 0 | 0 |
| 67 | 6  | 54.0013689253936 | 22.813896978551  | 0 | 0 |
| 67 | 7  | 57.0896646132786 | 21.5225443193878 | 0 | 0 |
| 67 | 8  | 61.1225188227242 | 23.2443478649388 | 0 | 0 |
| 67 | 9  | 65.160848733744  | 23.9617660089184 | 0 | 0 |
| 67 | 10 | 67.7864476386037 | 23.9617660089184 | 0 | 0 |
| 68 | 1  | 34.3381245722108 | 21.9100693556094 | 0 | 0 |
| 68 | 2  | 38.1683778234086 | 23.0055728233899 | 0 | 0 |
| 68 | 3  | 43.1676933607118 | 25.4400249740132 | 0 | 0 |
| 68 | 4  | 46.8336755646817 | 24.1010762911704 | 0 | 0 |
| 68 | 5  | 49.4154688569473 | 24.9531345438885 | 0 | 0 |
| 68 | 6  | 52.580424366872  | 23.9793536836392 | 0 | 0 |
| 68 | 7  | 55.6878850102669 | 24.7096893288262 | 0 | 1 |
| 68 | 8  | 58.4147843942505 | 25.5617475815443 | 0 | 1 |
| 68 | 9  | 61.223819301848  | 24.9531345438885 | 0 | 1 |
| 68 | 10 | 64.5503080082135 | 25.1965797589508 | 0 | 1 |
| 69 | 1  | 28.829568788501  | 24.4073024583416 | 0 | 0 |
| 69 | 2  | 36.2436687200548 | 27.3361787533426 | 0 | 0 |
| 69 | 3  | 41.409993155373  | 26.9177678540567 | 0 | 0 |
| 69 | 4  | 43.8083504449008 | 27.1967084535806 | 0 | 0 |
| 69 | 5  | 45.5797399041752 | 26.7782975542948 | 0 | 1 |
| 69 | 6  | 47.3347022587269 | 24.5467727581036 | 0 | 0 |
| 69 | 7  | 47.3949349760438 | 24.8257133576275 | 0 | 0 |
| 69 | 8  | 47.5345653661875 | 25.1046539571514 | 0 | 0 |
| 69 | 9  | 50.2505133470226 | 27.1967084535806 | 0 | 1 |
| 69 | 10 | 53.8891170431211 | 26.7782975542948 | 0 | 0 |
| 70 | 1  | 34.0835044490075 | 29.6493527929282 | 0 | 1 |
| 70 | 2  | 43.3347022587269 | 31.3218803863754 | 0 | 0 |
| 70 | 3  | 47.1649555099247 | 29.6493527929282 | 0 | 0 |
| 70 | 4  | 47.192334017796  | 29.6493527929282 | 0 | 0 |
| 70 | 5  | 49.7549623545517 | 29.4973048298875 | 0 | 0 |
| 70 | 6  | 52.5037645448323 | 27.6727292733997 | 0 | 0 |
| 70 | 7  | 56.7693360711841 | 28.5850170516436 | 0 | 0 |
| 70 | 8  | 58.0835044490075 | 28.1288731625216 | 0 | 0 |
| 70 | 9  | 58.1656399726215 | 28.1288731625216 | 0 | 0 |
| 70 | 10 | 59.895961670089  | 28.1288731625216 | 0 | 0 |
| 71 | 1  | 37.2703627652293 | 23.1112903821799 | 0 | 0 |
| 71 | 2  | 44.1204654346338 | 23.5674342713019 | 0 | 0 |
| 71 | 3  | 47.5975359342916 | 23.5674342713019 | 0 | 1 |

|    |    |                  |                  |   |   |
|----|----|------------------|------------------|---|---|
| 71 | 4  | 48.4544832306639 | 23.5674342713019 | 0 | 0 |
| 71 | 5  | 49.4647501711157 | 22.8071944560986 | 0 | 0 |
| 71 | 6  | 51.6906228610541 | 23.2633383452206 | 0 | 0 |
| 71 | 7  | 55.1211498973306 | 22.8071944560986 | 0 | 0 |
| 71 | 8  | 57.9493497604381 | 22.8071944560986 | 0 | 0 |
| 71 | 9  | 60.7008898015058 | 22.0469546408953 | 0 | 0 |
| 71 | 10 | 65.3908281998631 | 22.3510505669766 | 0 | 1 |
| 73 | 1  | 24.1670088980151 | 22.5269297209592 | 0 | 0 |
| 73 | 2  | 26.9185489390828 | 23.8182823801224 | 0 | 0 |
| 73 | 3  | 27.5838466803559 | 23.6747987513265 | 0 | 0 |
| 73 | 4  | 29.6618754277892 | 23.6747987513265 | 0 | 0 |
| 73 | 5  | 32.3696098562628 | 25.8270531832653 | 0 | 0 |
| 73 | 6  | 34.3326488706366 | 23.5313151225306 | 0 | 0 |
| 73 | 7  | 36.3422313483915 | 23.5313151225306 | 0 | 0 |
| 73 | 8  | 38.3326488706366 | 24.679184152898  | 0 | 0 |
| 73 | 9  | 40.2354551676934 | 24.9661514104898 | 0 | 0 |
| 73 | 10 | 42.0807665982204 | 25.3966022968776 | 0 | 0 |
| 74 | 1  | 33.3333333333333 | 26.3042976060337 | 0 | 0 |
| 74 | 2  | 37.8316221765914 | 28.2809211255623 | 0 | 1 |
| 74 | 3  | 42.5817932922656 | 28.5850170516436 | 0 | 1 |
| 74 | 4  | 46.5817932922656 | 24.3276740865052 | 0 | 0 |
| 74 | 5  | 49.3333333333333 | 27.2165853842777 | 0 | 0 |
| 74 | 6  | 52.2518822724162 | 27.064537421237  | 0 | 0 |
| 74 | 7  | 55.2854209445585 | 29.0411609407656 | 0 | 0 |
| 74 | 8  | 58.4093086926762 | 28.5850170516436 | 0 | 0 |
| 74 | 9  | 61.6509240246407 | 28.7370650146843 | 0 | 1 |
| 74 | 10 | 64.5119780971937 | 29.0411609407656 | 0 | 1 |
| 76 | 1  | 25.9164955509925 | 32.6851499315394 | 0 | 0 |
| 76 | 2  | 35.7481177275838 | 34.719495362963  | 0 | 1 |
| 76 | 3  | 40.5010266940452 | 35.5332335355324 | 0 | 0 |
| 76 | 4  | 44.5010266940452 | 35.9401026218171 | 0 | 1 |
| 76 | 5  | 47.2470910335387 | 37.2963329094329 | 0 | 1 |
| 76 | 6  | 48.5831622176591 | 34.8551183917245 | 0 | 1 |
| 76 | 7  | 50.3052703627652 | 33.9057571903935 | 0 | 1 |
| 76 | 8  | 52.5448323066393 | 32.5495269027778 | 0 | 1 |
| 76 | 9  | 53.1033538672142 | 34.5838723342014 | 0 | 0 |
| 76 | 10 | 56.0219028062971 | 36.3469717081018 | 0 | 1 |
| 77 | 1  | 32.8377823408624 | 27.2618894712245 | 0 | 0 |
| 77 | 2  | 34.7488021902806 | 28.5532421303878 | 0 | 0 |
| 77 | 3  | 37.5523613963039 | 28.6967257591837 | 0 | 0 |
| 77 | 4  | 40.5037645448323 | 27.9793076152041 | 0 | 0 |
| 77 | 5  | 43.5044490075291 | 29.1271766455714 | 0 | 0 |
| 77 | 6  | 46.8911704312115 | 27.2618894712245 | 0 | 0 |
| 77 | 7  | 48.9171800136893 | 29.4141439031633 | 0 | 0 |
| 77 | 8  | 50.8939082819986 | 28.6967257591837 | 0 | 0 |
| 77 | 9  | 52.9171800136893 | 28.6967257591837 | 0 | 0 |
| 77 | 10 | 54.9158110882957 | 30.9924638199184 | 0 | 0 |
| 78 | 1  | 27.9151266255989 | 24.4073024583416 | 1 | 1 |
| 78 | 2  | 35.7481177275838 | 25.1046539571514 | 1 | 1 |
| 78 | 3  | 39.7481177275838 | 25.8020054559611 | 1 | 1 |
| 78 | 4  | 42.4147843942505 | 26.4993569547709 | 1 | 0 |
| 78 | 5  | 45.3278576317591 | 27.0572381538187 | 1 | 0 |
| 78 | 6  | 54.8145106091718 | 25.5230648564372 | 1 | 1 |
| 78 | 7  | 61.2950034223135 | 25.6625351561992 | 1 | 1 |

|    |    |                  |                  |   |   |
|----|----|------------------|------------------|---|---|
| 78 | 8  | 68.8186173853525 | 25.9414757557231 | 1 | 0 |
| 78 | 9  | 80.5503080082135 | 29.2887629500099 | 1 | 0 |
| 78 | 10 | 84.3039014373717 | 29.149292650248  | 1 | 1 |
| 79 | 1  | 30.4202600958248 | 18.5495498683396 | 0 | 0 |
| 79 | 2  | 32.8377823408624 | 18.8284904678635 | 0 | 0 |
| 79 | 3  | 39.0828199863107 | 20.362663765245  | 0 | 0 |
| 79 | 4  | 43.7535934291581 | 20.362663765245  | 0 | 1 |
| 79 | 5  | 47.1676933607118 | 20.362663765245  | 0 | 1 |
| 79 | 6  | 50.1683778234086 | 21.4784261633406 | 0 | 0 |
| 79 | 7  | 52.8213552361396 | 19.1074310673874 | 0 | 1 |
| 79 | 8  | 56.2929500342231 | 20.5021340650069 | 0 | 0 |
| 79 | 9  | 58.8774811772758 | 21.7573667628645 | 0 | 0 |
| 79 | 10 | 62.1218343600274 | 19.5258419666733 | 0 | 0 |
| 80 | 1  | 29.0841889117043 | 22.2399624633673 | 0 | 0 |
| 80 | 2  | 35.3347022587269 | 23.2443478649388 | 0 | 0 |
| 80 | 3  | 40               | 24.1052496377143 | 0 |   |
| 80 | 4  | 44               | 23.5313151225306 | 0 |   |
| 80 | 5  | 46.8309377138946 | 25.6835695544694 | 0 | 1 |
| 80 | 6  | 49.7549623545517 | 25.2531186680816 | 0 | 0 |
| 80 | 7  | 52.7967145790554 | 25.3966022968776 | 0 | 1 |
| 80 | 8  | 55.6249144421629 | 24.3922168953061 | 0 | 0 |
| 80 | 9  | 58.8884325804244 | 25.2531186680816 | 0 | 0 |
| 80 | 10 | 61.7549623545517 | 24.3922168953061 | 0 | 0 |
| 81 | 1  | 30.5872689938398 | 21.4665474945592 | 0 | 0 |
| 81 | 2  | 31.4469541409993 | 20.9823396563361 | 0 | 0 |
| 81 | 3  | 34.3819301848049 | 21.3051448818182 | 0 | 0 |
| 81 | 4  | 36.5859000684463 | 22.2735605582645 | 0 | 0 |
| 81 | 5  | 38.5544147843943 | 21.6279501073003 | 0 | 0 |
| 81 | 6  | 39.772758384668  | 22.9191710092287 | 0 | 0 |
| 81 | 7  | 40.8350444900753 | 23.2419762347107 | 0 | 0 |
| 81 | 8  | 43.8329911019849 | 22.5963657837466 | 0 | 0 |
| 81 | 9  | 46.8336755646817 | 22.2735605582645 | 0 | 0 |
| 81 | 10 | 47.0143737166324 | 22.4349631710055 | 0 | 0 |
| 82 | 1  | 25.9137577002053 | 22.709984018601  | 0 | 0 |
| 82 | 2  | 34.8336755646817 | 22.5533634391624 | 0 | 0 |
| 82 | 3  | 40.1670088980151 | 21.7702605419693 | 0 | 0 |
| 82 | 4  | 43.5811088295688 | 23.4930869157942 | 0 | 0 |
| 82 | 5  | 46.2477754962355 | 22.709984018601  | 0 | 0 |
| 82 | 6  | 49.1663244353183 | 23.0232251774783 | 0 | 0 |
| 82 | 7  | 52.3586584531143 | 23.8063280746714 | 0 | 0 |
| 82 | 8  | 56.3641341546886 | 25.2159132896191 | 0 | 0 |
| 82 | 9  | 58.2258726899384 | 23.96294865411   | 0 | 0 |
| 82 | 10 | 60.5612594113621 | 25.685775027935  | 0 | 0 |
| 83 | 1  | 33.0075290896646 | 25.5440577908304 | 0 | 0 |
| 83 | 2  | 35.501711156742  | 26.4563455690744 | 0 | 0 |
| 83 | 3  | 40.4161533196441 | 27.976825199481  | 0 | 1 |
| 83 | 4  | 45.0047912388775 | 28.2809211255623 | 0 | 0 |
| 83 | 5  | 49.9219712525667 | 29.4973048298875 | 0 | 0 |
| 83 | 6  | 53.2511978097194 | 29.4973048298875 | 0 | 0 |
| 83 | 7  | 55.7535934291581 | 29.8014007559689 | 0 | 0 |
| 83 | 8  | 58.7843942505133 | 29.3452568668469 | 0 | 0 |
| 83 | 9  | 62.6967830253251 | 28.2809211255623 | 0 | 0 |
| 83 | 10 | 64.9281314168378 | 26.7604414951557 | 0 | 1 |
| 87 | 1  | 36.2518822724162 | 22.9573806073469 | 0 | 0 |

|    |    |                  |                  |   |   |
|----|----|------------------|------------------|---|---|
| 87 | 2  | 42.5051334702259 | 25.2531186680816 | 0 | 0 |
| 87 | 3  | 47.0855578370979 | 24.8226677816939 | 0 | 0 |
| 87 | 4  | 49.7522245037645 | 25.1096350392857 | 0 | 0 |
| 87 | 5  | 53.0841889117043 | 25.1096350392857 | 0 | 0 |
| 87 | 6  | 55.419575633128  | 26.5444713272449 | 0 | 0 |
| 87 | 7  | 59.0034223134839 | 25.5400859256735 | 0 | 0 |
| 87 | 8  | 61.5414099931554 | 26.5444713272449 | 0 | 0 |
| 87 | 9  | 64.9089664613279 | 26.6879549560408 | 0 | 0 |
| 87 | 10 | 66.0944558521561 | 26.1140204408571 | 0 | 0 |
| 88 | 1  | 34.4147843942505 | 26.4993569547709 | 0 | 0 |
| 88 | 2  | 40.331279945243  | 36.4017482378695 | 0 | 1 |
| 88 | 3  | 41.1663244353183 | 30.6834659476294 | 0 | 0 |
| 88 | 4  | 46.1683778234086 | 29.2887629500099 | 0 | 1 |
| 88 | 5  | 49.4976043805613 | 30.9624065471533 | 0 | 0 |
| 88 | 6  | 52.5831622176591 | 29.2887629500099 | 0 | 1 |
| 88 | 7  | 55.7399041752224 | 29.8466441490577 | 0 | 0 |
| 88 | 8  | 58.2450376454483 | 29.9861144488197 | 0 | 0 |
| 88 | 9  | 63.7864476386037 | 27.0572381538187 | 0 | 1 |
| 88 | 10 | 65.3552361396304 | 26.3598866550089 | 0 | 1 |
| 91 | 1  | 32.6680355920602 | 23.7523574695946 | 1 | 0 |
| 91 | 2  | 37.5003422313484 | 23.6239663481373 | 1 | 0 |
| 91 | 3  | 42.4202600958248 | 25.5498331699963 | 1 | 0 |
| 91 | 4  | 46.1683778234086 | 24.5227041983382 | 1 | 0 |
| 91 | 5  | 48.8377823408624 | 25.9350065343681 | 1 | 1 |
| 91 | 6  | 51.5865845311431 | 25.0362686841673 | 1 | 1 |
| 91 | 7  | 54.5845311430527 | 25.8066154129109 | 1 | 1 |
| 91 | 8  | 57.8206707734428 | 26.5769621416545 | 1 | 1 |
| 91 | 9  | 61.1252566735113 | 27.4756999918554 | 1 | 1 |
| 91 | 10 | 64.3230663928816 | 26.833744384569  | 1 | 0 |
| 92 | 1  | 31.0198494182067 | 24.2183247427851 | 0 | 0 |
| 92 | 2  | 31.5564681724846 | 24.2183247427851 | 0 | 0 |
| 92 | 3  | 34.8884325804244 | 25.8427245730939 | 0 | 0 |
| 92 | 4  | 35.1047227926078 | 25.1043610138626 | 0 | 0 |
| 92 | 5  | 37.6344969199179 | 25.1043610138626 | 0 | 1 |
| 92 | 6  | 38.1327857631759 | 25.1043610138626 | 0 | 0 |
| 92 | 7  | 38.3107460643395 | 25.1043610138626 | 0 | 0 |
| 92 | 8  | 41.6071184120465 | 25.2520337257089 | 0 | 0 |
| 92 | 9  | 41.6728268309377 | 25.8427245730939 | 0 | 0 |
| 92 | 10 | 42.1601642710472 | 24.8090155901701 | 0 | 0 |
| 95 | 1  | 39.9014373716632 | 24.2761898129873 | 0 | 0 |
| 95 | 2  | 41.5852156057495 | 25.0592927101804 | 0 | 0 |
| 95 | 3  | 45.0814510609172 | 25.0592927101804 | 0 | 0 |
| 95 | 4  | 48.5092402464066 | 25.685775027935  | 0 | 0 |
| 95 | 5  | 49.0841889117043 | 26.6254985045667 | 0 | 0 |
| 95 | 6  | 49.5934291581109 | 26.7821190840053 | 0 | 0 |
| 95 | 7  | 49.8918548939083 | 26.938739663444  | 0 | 0 |
| 95 | 8  | 50.5051334702259 | 26.6254985045667 | 0 | 0 |
| 95 | 9  | 50.9568788501027 | 26.6254985045667 | 0 | 0 |
| 95 | 10 | 51.6659822039699 | 26.4688779251281 | 0 | 0 |
| 96 | 1  | 32.9993155373032 | 24.6317700125865 | 0 | 0 |
| 96 | 2  | 33.6043805612594 | 24.9358659386678 | 0 | 0 |
| 96 | 3  | 36.6899383983573 | 25.8481537169118 | 0 | 0 |
| 96 | 4  | 37.8288843258042 | 25.5440577908304 | 0 | 0 |
| 96 | 5  | 39.4524298425736 | 27.2165853842777 | 0 | 0 |

|     |    |                  |                  |   |   |
|-----|----|------------------|------------------|---|---|
| 96  | 6  | 41.864476386037  | 24.3276740865052 | 0 | 0 |
| 96  | 7  | 42.2477754962355 | 24.0235781604239 | 0 | 0 |
| 96  | 8  | 45.7467488021903 | 24.3276740865052 | 0 | 0 |
| 96  | 9  | 47.9890485968515 | 25.0879139017085 | 0 | 0 |
| 96  | 10 | 48.6954140999316 | 26.7604414951557 | 0 | 0 |
| 97  | 1  | 34.6091718001369 | 22.3152479619123 | 0 | 0 |
| 97  | 2  | 35.5893223819302 | 22.1757776621504 | 0 | 0 |
| 97  | 3  | 36.1259411362081 | 22.0363073623884 | 0 | 0 |
| 97  | 4  | 38.0588637919233 | 22.5941885614362 | 0 | 0 |
| 97  | 5  | 40.5037645448323 | 22.3152479619123 | 0 | 0 |
| 97  | 6  | 42.8172484599589 | 21.3389558635787 | 0 | 0 |
| 97  | 7  | 44.7501711156742 | 23.0125994607221 | 0 | 0 |
| 97  | 8  | 46.8966461327858 | 23.7099509595318 | 0 | 0 |
| 97  | 9  | 48.1505817932923 | 23.9888915590557 | 0 | 0 |
| 97  | 10 | 48.9171800136893 | 24.1283618588177 | 0 | 0 |
| 98  | 1  | 33.6673511293634 | 26.6879549560408 | 0 | 0 |
| 98  | 2  | 34.2340862422998 | 26.5444713272449 | 0 | 0 |
| 98  | 3  | 35.3456536618754 | 27.5488567288163 | 0 | 0 |
| 98  | 4  | 36.7118412046543 | 28.6967257591837 | 0 | 0 |
| 98  | 5  | 38.3381245722108 | 29.4141439031633 | 0 | 0 |
| 98  | 6  | 40.7556468172485 | 29.2706602743673 | 0 | 0 |
| 98  | 7  | 41.3114305270363 | 29.4141439031633 | 0 | 0 |
| 98  | 8  | 44.3367556468172 | 30.1315620471429 | 0 | 0 |
| 98  | 9  | 47.3127994524298 | 30.5620129335306 | 0 | 0 |
| 98  | 10 | 49.2539356605065 | 29.844594789551  | 0 | 0 |
| 99  | 1  | 26.7488021902806 | 20.6616425466122 | 0 | 0 |
| 99  | 2  | 29.5715263518138 | 20.8051261754082 | 0 | 0 |
| 99  | 3  | 31.0006844626968 | 21.5225443193878 | 0 | 0 |
| 99  | 4  | 33.1006160164271 | 21.8095115769796 | 0 | 0 |
| 99  | 5  | 33.9000684462697 | 21.8095115769796 | 0 | 0 |
| 99  | 6  | 36.5010266940452 | 22.0964788345714 | 0 | 0 |
| 99  | 7  | 39.5181382614647 | 23.1008642361429 | 0 | 0 |
| 99  | 8  | 41.8343600273785 | 23.8182823801224 | 0 | 0 |
| 99  | 9  | 43.7289527720739 | 23.1008642361429 | 0 | 0 |
| 99  | 10 | 45.7494866529774 | 23.5313151225306 | 0 | 0 |
| 100 | 1  | 38.4503764544832 | 26.6054238453369 | 0 | 0 |
| 100 | 2  | 42.9158110882957 | 27.9786070115479 | 0 | 0 |
| 100 | 3  | 45.8562628336756 | 25.5755364706787 | 0 | 0 |
| 100 | 4  | 49.3333333333333 | 28.1502549073242 | 0 | 0 |
| 100 | 5  | 52.9144421629021 | 29.0084943862061 | 0 | 0 |
| 100 | 6  | 55.4633812457221 | 31.7548607186279 | 0 | 1 |
| 100 | 7  | 57.4948665297741 | 30.2100296566406 | 0 | 0 |
| 100 | 8  | 59.4962354551677 | 30.7249733439697 | 0 | 0 |
| 100 | 9  | 61.4948665297741 | 29.1801422819824 | 0 | 0 |
| 100 | 10 | 63.5373032169747 | 29.6950859693115 | 0 | 0 |
| 103 | 1  | 26.7104722792608 | 19.8007407738367 | 0 | 0 |
| 103 | 2  | 36.1670088980151 | 20.5181589178163 | 0 | 0 |
| 103 | 3  | 36.3860369609856 | 20.5181589178163 | 0 | 0 |
| 103 | 4  | 42.1656399726215 | 22.6704133497551 | 0 | 0 |
| 103 | 5  | 45.3333333333333 | 22.6704133497551 | 0 | 0 |
| 103 | 6  | 47.4168377823409 | 23.5313151225306 | 0 | 0 |
| 103 | 7  | 52.5913757700205 | 23.5313151225306 | 0 | 0 |
| 103 | 8  | 56.3340177960301 | 23.6747987513265 | 0 | 0 |
| 103 | 9  | 59.4551676933607 | 22.9573806073469 | 0 | 0 |

|     |    |                  |                  |   |   |
|-----|----|------------------|------------------|---|---|
| 103 | 10 | 66.4914442162902 | 23.6747987513265 | 0 | 0 |
| 104 | 1  | 30.8939082819986 | 23.1008642361429 | 0 | 0 |
| 104 | 2  | 36.331279945243  | 24.3922168953061 | 0 | 0 |
| 104 | 3  | 42.6666666666667 | 23.6747987513265 | 0 | 0 |
| 104 | 4  | 46.7515400410678 | 23.9617660089184 | 0 | 0 |
| 104 | 5  | 49.2484599589322 | 25.5400859256735 | 0 | 0 |
| 104 | 6  | 52.4134154688569 | 24.9661514104898 | 0 | 1 |
| 104 | 7  | 55.4140999315537 | 27.1184058424286 | 0 | 0 |
| 104 | 8  | 58.1848049281314 | 25.2531186680816 | 0 | 1 |
| 104 | 9  | 61.2594113620808 | 24.3922168953061 | 0 | 1 |
| 104 | 10 | 62.113620807666  | 22.0964788345714 | 0 | 0 |
| 105 | 1  | 33.6947296372348 | 26.4334154204789 | 0 | 0 |
| 105 | 2  | 34.2477754962355 | 26.5810881323251 | 0 | 0 |
| 105 | 3  | 34.7405886379192 | 27.3194516915564 | 0 | 0 |
| 105 | 4  | 35.2498288843258 | 27.3194516915564 | 0 | 0 |
| 105 | 5  | 35.7043121149897 | 27.3194516915564 | 0 | 0 |
| 105 | 6  | 36.186173853525  | 27.3194516915564 | 0 | 0 |
| 105 | 7  | 36.6981519507187 | 27.3194516915564 | 0 | 0 |
| 105 | 8  | 36.8514715947981 | 27.3194516915564 | 0 | 0 |
| 105 | 9  | 37.1827515400411 | 27.3194516915564 | 0 | 0 |
| 105 | 10 | 37.6728268309377 | 27.3194516915564 | 0 | 0 |
| 106 | 1  | 31.8384668035592 | 23.4799611835539 | 0 | 0 |
| 106 | 2  | 39.668720054757  | 27.3194516915564 | 0 | 0 |
| 106 | 3  | 40.9144421629021 | 26.5810881323251 | 0 | 0 |
| 106 | 4  | 44.7529089664613 | 28.6485060981727 | 0 | 0 |
| 106 | 5  | 48.9883641341547 | 30.4205786403277 | 0 | 0 |
| 106 | 6  | 50.5872689938398 | 31.3066149114052 | 0 | 0 |
| 106 | 7  | 53.9219712525667 | 28.7961788100189 | 0 | 0 |
| 106 | 8  | 56.9089664613279 | 31.0112694877127 | 0 | 0 |
| 106 | 9  | 59.6659822039699 | 26.5810881323251 | 0 | 0 |
| 106 | 10 | 62.3244353182752 | 28.0578152507877 | 0 | 0 |
| 107 | 1  | 27.0855578370979 | 20.4495807976168 | 0 | 1 |
| 107 | 2  | 32.5886379192334 | 19.921849680259  | 0 | 0 |
| 107 | 3  | 38.6666666666667 | 20.7134463562957 | 0 | 1 |
| 107 | 4  | 43.0006844626968 | 23.8798330604429 | 0 | 0 |
| 107 | 5  | 45.8316221765914 | 23.0882363844061 | 0 | 0 |
| 107 | 6  | 49.9028062970568 | 24.6714297364796 | 0 | 0 |
| 107 | 7  | 53.3826146475017 | 24.1436986191218 | 0 | 0 |
| 107 | 8  | 56.1615331964408 | 23.7479002811034 | 0 | 0 |
| 107 | 9  | 59.9425051334702 | 22.9563036050666 | 0 | 0 |
| 107 | 10 | 61.5523613963039 | 22.9563036050666 | 0 | 1 |
| 110 | 1  | 27.6659822039699 | 23.8807485910519 | 0 | 0 |
| 110 | 2  | 28.9445585215606 | 23.8807485910519 | 0 | 0 |
| 110 | 3  | 33.6646132785763 | 25.1646598056245 | 0 | 0 |
| 110 | 4  | 36.1779603011636 | 26.32017989874   | 0 | 0 |
| 110 | 5  | 37.9986310746064 | 26.5769621416545 | 0 | 0 |
| 110 | 6  | 41.3305954825462 | 26.833744384569  | 0 | 0 |
| 110 | 7  | 44.9993155373032 | 28.246046720599  | 0 | 1 |
| 110 | 8  | 47.917864476386  | 27.6040911133126 | 0 | 1 |
| 110 | 9  | 52.2683093771389 | 29.1447845707999 | 0 | 1 |
| 110 | 10 | 56.4626967830253 | 23.1104018623083 | 0 | 0 |
| 111 | 1  | 28.7529089664613 | 23.7753066072464 | 1 | 0 |
| 111 | 2  | 31.6878850102669 | 25.8427245730939 | 1 | 0 |
| 111 | 3  | 33.4182067077344 | 28.5008333863264 | 1 | 1 |



|     |    |                  |                  |   |   |
|-----|----|------------------|------------------|---|---|
| 111 | 4  | 36.4243668720055 | 27.4671244034026 | 1 | 0 |
| 111 | 5  | 38.1656399726215 | 27.7624698270951 | 1 | 0 |
| 111 | 6  | 38.8939082819986 | 29.8298877929427 | 1 | 0 |
| 111 | 7  | 41.4182067077344 | 29.2391969455577 | 1 | 1 |
| 111 | 8  | 44.3340177960301 | 29.5345423692502 | 1 | 0 |
| 111 | 9  | 47.4168377823409 | 30.5682513521739 | 1 | 1 |
| 111 | 10 | 50.0013689253936 | 29.3868696574039 | 1 | 1 |
| 112 | 1  | 27.5811088295688 | 24.3922168953061 | 0 | 0 |
| 112 | 2  | 28.4161533196441 | 23.9617660089184 | 0 | 0 |
| 112 | 3  | 30.9869952087611 | 23.2443478649388 | 0 | 0 |
| 112 | 4  | 34.4996577686516 | 23.9617660089184 | 0 | 0 |
| 112 | 5  | 35.4442162902122 | 24.8226677816939 | 0 | 0 |
| 112 | 6  | 38.9185489390828 | 24.3922168953061 | 0 | 0 |
| 112 | 7  | 40.2765229295003 | 23.9617660089184 | 0 | 0 |
| 112 | 8  | 43.0006844626968 | 24.535700524102  | 0 | 1 |
| 112 | 9  | 45.5003422313484 | 24.3922168953061 | 0 | 0 |
| 112 | 10 | 48               | 24.679184152898  | 0 | 0 |
| 113 | 1  | 30.0287474332649 | 23.6747987513265 | 0 | 1 |
| 113 | 2  | 30.5325119780972 | 24.3922168953061 | 0 | 0 |
| 113 | 3  | 33.7522245037645 | 22.6704133497551 | 0 | 0 |
| 113 | 4  | 40.0219028062971 | 25.3966022968776 | 0 | 0 |
| 113 | 5  | 40.517453798768  | 26.5444713272449 | 0 | 1 |
| 113 | 6  | 41.0102669404517 | 26.5444713272449 | 0 | 0 |
| 113 | 7  | 41.4182067077344 | 25.3966022968776 | 0 | 0 |
| 113 | 8  | 41.9383983572895 | 27.6923403576122 | 0 | 0 |
| 113 | 9  | 42.2422997946612 | 27.6923403576122 | 0 | 0 |
| 113 | 10 | 42.425735797399  | 24.9661514104898 | 0 | 0 |
| 114 | 1  | 21.1498973305955 | 18.6375894634793 | 0 | 0 |
| 114 | 2  | 23.7481177275838 | 18.9704035610414 | 0 | 0 |
| 114 | 3  | 24.8432580424367 | 19.1368106098225 | 0 | 0 |
| 114 | 4  | 25.3552361396304 | 20.468067000071  | 0 | 0 |
| 114 | 5  | 26.0643394934976 | 19.3032176586036 | 0 | 0 |
| 114 | 6  | 27.3292265571526 | 22.7977656830059 | 0 | 0 |
| 114 | 7  | 28.0191649555099 | 24.4618361708166 | 0 | 1 |
| 114 | 8  | 28.9993155373032 | 24.6282432195976 | 0 | 0 |
| 114 | 9  | 29.9466119096509 | 24.7946502683787 | 0 | 0 |
| 114 | 10 | 30.9349760438056 | 25.1274643659408 | 0 | 0 |
| 115 | 1  | 30.5462012320329 | 21.2928155155671 | 0 | 0 |
| 115 | 2  | 34.3326488706366 | 23.4627839757523 | 0 | 0 |
| 115 | 3  | 39.3347022587269 | 24.9546372921296 | 0 | 0 |
| 115 | 4  | 39.4989733059548 | 24.9546372921296 | 0 | 0 |
| 115 | 5  | 44.580424366872  | 24.6833912346065 | 0 | 0 |
| 115 | 6  | 48.0848733744011 | 24.9546372921296 | 0 | 1 |
| 115 | 7  | 50.5817932922656 | 24.0052760907986 | 0 | 0 |
| 115 | 8  | 54.135523613963  | 22.5134227744213 | 0 | 0 |
| 115 | 9  | 56.4654346338125 | 22.920291860706  | 0 | 1 |
| 115 | 10 | 59.4168377823409 | 20.072208256713  | 0 | 0 |
| 116 | 1  | 36.8350444900753 | 25.8481537169118 | 0 | 1 |
| 116 | 2  | 36.9965776865161 | 26.1522496429931 | 0 | 1 |
| 116 | 3  | 37.4948665297741 | 25.8481537169118 | 0 | 1 |
| 116 | 4  | 38.4229979466119 | 25.8481537169118 | 0 | 1 |
| 116 | 5  | 38.8966461327858 | 23.7194822343426 | 0 | 1 |
| 116 | 6  | 39.4004106776181 | 23.5674342713019 | 0 | 1 |
| 116 | 7  | 39.7946611909651 | 23.5674342713019 | 0 | 1 |

|     |    |                  |                  |   |   |
|-----|----|------------------|------------------|---|---|
| 116 | 8  | 39.9123887748118 | 24.7838179756272 | 0 | 1 |
| 116 | 9  | 40.4079397672827 | 25.8481537169118 | 0 | 1 |
| 116 | 10 | 40.8980150581793 | 26.1522496429931 | 0 | 1 |
| 117 | 1  | 34.9158110882957 | 26.7604414951557 | 0 | 0 |
| 117 | 2  | 41.4182067077344 | 27.3686333473183 | 0 | 0 |
| 117 | 3  | 43.5044490075291 | 29.1932089038062 | 0 | 0 |
| 117 | 4  | 46.5051334702259 | 27.6727292733997 | 0 | 0 |
| 117 | 5  | 50.6666666666667 | 28.8891129777249 | 0 | 0 |
| 117 | 6  | 53.3333333333333 | 26.4563455690744 | 0 | 0 |
| 117 | 7  | 56.7529089664613 | 26.6083935321151 | 0 | 0 |
| 117 | 8  | 59.4442162902122 | 27.3686333473183 | 0 | 0 |
| 117 | 9  | 62.4120465434634 | 26.0002016799524 | 0 | 0 |
| 117 | 10 | 63.3894592744695 | 27.520681310359  | 0 | 1 |
| 119 | 1  | 29.3388090349076 | 24.3943130768809 | 0 | 0 |
| 119 | 2  | 32.6926762491444 | 27.6040911133126 | 0 | 0 |
| 119 | 3  | 34.9404517453799 | 25.4214420485391 | 0 | 0 |
| 119 | 4  | 37.4045174537988 | 25.6782242914536 | 0 | 1 |
| 119 | 5  | 37.8918548939083 | 24.7794864412527 | 0 | 0 |
| 119 | 6  | 38.3709787816564 | 25.0362686841673 | 0 | 0 |
| 119 | 7  | 38.8364134154689 | 25.4214420485391 | 0 | 0 |
| 119 | 8  | 39.4140999315537 | 27.2189177489408 | 0 | 0 |
| 119 | 9  | 39.8329911019849 | 25.4214420485391 | 0 | 0 |
| 119 | 10 | 40.4106776180698 | 25.8066154129109 | 0 | 0 |
| 120 | 1  | 33.6646132785763 | 23.2443478649388 | 0 | 0 |
| 120 | 2  | 37.7494866529774 | 23.8182823801224 | 0 | 0 |
| 120 | 3  | 41.8973305954825 | 24.3922168953061 | 0 | 0 |
| 120 | 4  | 42.7488021902806 | 23.5313151225306 | 0 | 0 |
| 120 | 5  | 45.7932922655715 | 25.8270531832653 | 0 | 0 |
| 120 | 6  | 46.3353867214237 | 22.813896978551  | 0 | 0 |
| 120 | 7  | 50.1683778234086 | 23.9617660089184 | 0 | 0 |
| 120 | 8  | 52.4188911704312 | 24.9661514104898 | 0 | 0 |
| 120 | 9  | 55.8110882956879 | 23.3878314937347 | 0 | 0 |
| 120 | 10 | 58.8336755646817 | 24.3922168953061 | 0 | 0 |
| 122 | 1  | 25.9849418206708 | 23.3322884717076 | 0 | 0 |
| 122 | 2  | 27.0006844626968 | 22.7415976243226 | 0 | 0 |
| 122 | 3  | 27.8603696098563 | 23.6276338954001 | 0 | 0 |
| 122 | 4  | 27.9972621492129 | 23.6276338954001 | 0 | 0 |
| 122 | 5  | 28.3230663928816 | 22.5939249124764 | 0 | 0 |
| 122 | 6  | 28.8268309377139 | 23.0369430480151 | 0 | 0 |
| 122 | 7  | 31.2717316906229 | 23.3322884717076 | 0 | 0 |
| 122 | 8  | 31.6659822039699 | 22.8892703361689 | 0 | 0 |
| 122 | 9  | 34.1820670773443 | 24.3659974546314 | 0 | 0 |
| 122 | 10 | 34.2888432580424 | 24.3659974546314 | 0 | 0 |
| 123 | 1  | 30.5160848733744 | 22.0032340650914 | 1 | 0 |
| 123 | 2  | 43.8329911019849 | 26.5810881323251 | 1 | 0 |
| 123 | 3  | 47.6659822039699 | 26.5810881323251 | 1 | 0 |
| 123 | 4  | 52               | 26.5810881323251 | 1 | 0 |
| 123 | 5  | 54.7597535934292 | 26.5810881323251 | 1 | 0 |
| 123 | 6  | 58.6803559206023 | 26.5810881323251 | 1 | 0 |
| 123 | 7  | 62.3271731690623 | 26.2857427086326 | 1 | 0 |
| 123 | 8  | 67.3949349760438 | 26.5810881323251 | 1 | 0 |
| 123 | 9  | 73.7577002053388 | 27.1717789797101 | 1 | 0 |
| 123 | 10 | 75.1786447638604 | 27.4671244034026 | 1 | 1 |
| 124 | 1  | 29.5852156057495 | 21.5908107517734 | 0 | 0 |

|     |    |                  |                  |   |   |
|-----|----|------------------|------------------|---|---|
| 124 | 2  | 30.7433264887064 | 22.8071944560986 | 0 | 0 |
| 124 | 3  | 31.750855578371  | 22.8071944560986 | 0 | 0 |
| 124 | 4  | 33.8891170431211 | 22.8071944560986 | 0 | 0 |
| 124 | 5  | 34.8364134154689 | 21.8949066778547 | 0 | 0 |
| 124 | 6  | 35.8494182067077 | 22.0469546408953 | 0 | 0 |
| 124 | 7  | 37.9986310746064 | 22.655146493058  | 0 | 0 |
| 124 | 8  | 41.2922655715264 | 23.1112903821799 | 0 | 0 |
| 124 | 9  | 42.7515400410678 | 23.1112903821799 | 0 | 0 |
| 124 | 10 | 44.7008898015058 | 23.2633383452206 | 0 | 0 |
| 126 | 1  | 20.1998631074606 | 21.6178964631026 | 0 | 0 |
| 126 | 2  | 22.5051334702259 | 22.3152479619123 | 0 | 0 |
| 126 | 3  | 25.533196440794  | 23.4310103600079 | 0 | 0 |
| 126 | 4  | 26.5872689938398 | 24.4073024583416 | 0 | 0 |
| 126 | 5  | 28.6488706365503 | 25.1046539571514 | 0 | 0 |
| 126 | 6  | 29.264887063655  | 25.1046539571514 | 0 | 0 |
| 126 | 7  | 32.5859000684463 | 25.9414757557231 | 0 | 0 |
| 126 | 8  | 35.9890485968515 | 24.9651836573894 | 0 | 0 |
| 126 | 9  | 37.6728268309377 | 26.4993569547709 | 0 | 0 |
| 126 | 10 | 40.5037645448323 | 25.8020054559611 | 0 | 0 |
| 127 | 1  | 25.4592744695414 | 22.5030985300173 | 0 | 0 |
| 127 | 2  | 28.4134154688569 | 22.8071944560986 | 0 | 0 |
| 127 | 3  | 30.6502395619439 | 24.3276740865052 | 0 | 0 |
| 127 | 4  | 31.7426420260096 | 24.9358659386678 | 0 | 0 |
| 127 | 5  | 32.7775496235455 | 25.0879139017085 | 0 | 0 |
| 127 | 6  | 34.0807665982204 | 26.6083935321151 | 0 | 1 |
| 127 | 7  | 35.1457905544148 | 26.6083935321151 | 0 | 0 |
| 127 | 8  | 35.7672826830938 | 25.5440577908304 | 0 | 0 |
| 127 | 9  | 36.0684462696783 | 26.6083935321151 | 0 | 1 |
| 127 | 10 | 37.5496235455168 | 25.8481537169118 | 0 | 0 |
| 128 | 1  | 25.5578370978782 | 21.6178964631026 | 0 | 0 |
| 128 | 2  | 31.9206023271732 | 23.0125994607221 | 0 | 0 |
| 128 | 3  | 38.0835044490075 | 27.0572381538187 | 0 | 0 |
| 128 | 4  | 42.9979466119097 | 27.3361787533426 | 0 | 0 |
| 128 | 5  | 46.1656399726215 | 28.4519411514382 | 0 | 0 |
| 128 | 6  | 48.6707734428474 | 30.4045253481055 | 0 | 0 |
| 128 | 7  | 52.5612594113621 | 32.3571095447729 | 0 | 0 |
| 128 | 8  | 56.5968514715948 | 32.7755204440587 | 0 | 0 |
| 128 | 9  | 60.9828884325804 | 35.1465155400119 | 0 | 1 |
| 128 | 10 | 63.192334017796  | 35.9833373385836 | 0 | 0 |
| 129 | 1  | 38.4339493497604 | 21.6136399625306 | 0 | 0 |
| 129 | 2  | 42.0506502395619 | 20.9871576447761 | 0 | 0 |
| 129 | 3  | 45.3826146475017 | 21.1437782242147 | 0 | 0 |
| 129 | 4  | 48.5941136208077 | 21.1437782242147 | 0 | 0 |
| 129 | 5  | 52.2710472279261 | 21.1437782242147 | 0 | 0 |
| 129 | 6  | 54.5407255304586 | 21.9268811214079 | 0 | 0 |
| 129 | 7  | 56.5448323066393 | 22.5533634391624 | 0 | 0 |
| 129 | 8  | 58.6913073237509 | 22.8666045980397 | 0 | 0 |
| 129 | 9  | 60.6488706365503 | 21.7702605419693 | 0 | 1 |
| 129 | 10 | 63.7234770704997 | 21.6136399625306 | 0 | 1 |
| 130 | 1  | 36               | 27.8940599523904 | 0 | 0 |
| 130 | 2  | 40.9007529089665 | 26.4993569547709 | 0 | 0 |
| 130 | 3  | 41.7960301163587 | 26.6388272545328 | 0 | 0 |
| 130 | 4  | 43.1238877481177 | 26.7782975542948 | 0 | 0 |
| 130 | 5  | 45.9164955509925 | 24.4073024583416 | 0 | 0 |

|     |    |                  |                  |   |   |
|-----|----|------------------|------------------|---|---|
| 130 | 6  | 48.580424366872  | 26.7782975542948 | 0 | 0 |
| 130 | 7  | 52.0848733744011 | 27.4756490531045 | 0 | 0 |
| 130 | 8  | 55.5811088295688 | 26.4993569547709 | 0 | 0 |
| 130 | 9  | 59.4058863791923 | 25.3835945566753 | 0 | 0 |
| 130 | 10 | 62.6858316221766 | 27.1967084535806 | 0 | 1 |
| 131 | 1  | 40.4134154688569 | 25.8481537169118 | 0 | 0 |
| 131 | 2  | 42.611909650924  | 27.3686333473183 | 0 | 0 |
| 131 | 3  | 43.6960985626283 | 27.2165853842777 | 0 | 1 |
| 131 | 4  | 45.0650239561944 | 26.6083935321151 | 0 | 0 |
| 131 | 5  | 46.4531143052704 | 26.6083935321151 | 0 | 0 |
| 131 | 6  | 48.2874743326489 | 28.5850170516436 | 0 | 0 |
| 131 | 7  | 49.4592744695414 | 27.976825199481  | 0 | 0 |
| 131 | 8  | 52.4544832306639 | 29.8014007559689 | 0 | 0 |
| 131 | 9  | 55.4496919917864 | 29.4973048298875 | 0 | 0 |
| 131 | 10 | 58.8993839835729 | 30.4095926081315 | 0 | 1 |
| 133 | 1  | 28.2847364818617 | 23.8875866856749 | 0 | 0 |
| 133 | 2  | 37.8316221765914 | 24.5331971366391 | 0 | 0 |
| 133 | 3  | 42.2477754962355 | 24.5331971366391 | 0 | 0 |
| 133 | 4  | 46.0835044490075 | 26.6314311022727 | 0 | 1 |
| 133 | 5  | 49.0924024640657 | 27.2770415532369 | 0 | 0 |
| 133 | 6  | 49.4127310061602 | 25.8244180385675 | 0 | 0 |
| 133 | 7  | 51.2470910335387 | 25.5016128130854 | 0 | 0 |
| 133 | 8  | 54.4394250513347 | 24.210391911157  | 0 | 1 |
| 133 | 9  | 59.482546201232  | 25.8244180385675 | 0 | 0 |
| 133 | 10 | 64.8432580424367 | 25.8244180385675 | 0 | 0 |
| 134 | 1  | 33.2511978097194 | 21.4284385443287 | 0 | 0 |
| 134 | 2  | 38.7460643394935 | 21.6996846018519 | 0 | 0 |
| 134 | 3  | 43.6659822039699 | 21.021569458044  | 0 | 0 |
| 134 | 4  | 47.4989733059548 | 20.8859464292824 | 0 | 0 |
| 134 | 5  | 50.1656399726215 | 22.3777997456597 | 0 | 0 |
| 134 | 6  | 53.0841889117043 | 21.5640615730903 | 0 | 1 |
| 134 | 7  | 56.4298425735797 | 22.2421767168981 | 0 | 0 |
| 134 | 8  | 59.0417522245038 | 22.2421767168981 | 0 | 0 |
| 134 | 9  | 62.8172484599589 | 22.3777997456597 | 0 | 0 |
| 134 | 10 | 64.1724845995893 | 21.8353076306134 | 0 | 0 |
| 135 | 1  | 31.1676933607118 | 23.9888915590557 | 0 | 0 |
| 135 | 2  | 31.5427789185489 | 23.9888915590557 | 0 | 0 |
| 135 | 3  | 33.1772758384668 | 25.1046539571514 | 0 | 0 |
| 135 | 4  | 34.9568788501027 | 25.2441242569133 | 0 | 0 |
| 135 | 5  | 35.419575633128  | 26.220416355247  | 0 | 0 |
| 135 | 6  | 37.4154688569473 | 26.3598866550089 | 0 | 0 |
| 135 | 7  | 37.9082819986311 | 25.8020054559611 | 0 | 0 |
| 135 | 8  | 39.3839835728953 | 24.8257133576275 | 0 | 0 |
| 135 | 9  | 41.3360711841205 | 26.3598866550089 | 0 | 0 |
| 135 | 10 | 43.3127994524298 | 26.080946055485  | 0 | 0 |
| 136 | 1  | 30.3326488706366 | 22.7846688319444 | 0 | 0 |
| 136 | 2  | 32.580424366872  | 23.3271609469907 | 0 | 0 |
| 136 | 3  | 38.0862422997947 | 25.9039984934606 | 0 | 0 |
| 136 | 4  | 43.0855578370979 | 26.5821136372685 | 0 | 0 |
| 136 | 5  | 46.4996577686516 | 25.6327524359375 | 0 | 0 |
| 136 | 6  | 49.5468856947296 | 25.3615063784144 | 0 | 0 |
| 136 | 7  | 52.2464065708419 | 25.7683754646991 | 0 | 0 |
| 136 | 8  | 54.9869952087611 | 25.3615063784144 | 0 | 0 |
| 136 | 9  | 58.4613278576318 | 24.4121451770833 | 0 | 0 |

|     |    |                  |                  |   |   |
|-----|----|------------------|------------------|---|---|
| 136 | 10 | 61.0869267624914 | 25.9039984934606 | 0 | 0 |
| 139 | 1  | 24.9281314168378 | 21.4284385443287 | 0 | 0 |
| 139 | 2  | 30.2477754962355 | 22.6490458031829 | 0 | 0 |
| 139 | 3  | 31.3456536618754 | 22.3777997456597 | 0 | 0 |
| 139 | 4  | 32.2819986310746 | 23.0559148894676 | 0 | 0 |
| 139 | 5  | 32.7802874743326 | 23.7340300332755 | 0 | 0 |
| 139 | 6  | 34.5817932922656 | 24.4121451770833 | 0 | 0 |
| 139 | 7  | 38.7707049965777 | 25.0902603208912 | 0 | 1 |
| 139 | 8  | 41.9164955509925 | 25.6327524359375 | 0 | 0 |
| 139 | 9  | 44.4955509924709 | 25.7683754646991 | 0 | 0 |
| 139 | 10 | 47.2470910335387 | 26.0396215222222 | 0 | 0 |
| 141 | 1  | 36.0848733744011 | 22.3777997456597 | 0 | 0 |
| 141 | 2  | 36.9801505817933 | 21.970930659375  | 0 | 0 |
| 141 | 3  | 39.0362765229295 | 22.7846688319444 | 0 | 0 |
| 141 | 4  | 41.1362080766598 | 21.4284385443287 | 0 | 0 |
| 141 | 5  | 41.7303216974675 | 21.4284385443287 | 0 | 0 |
| 141 | 6  | 42.1601642710472 | 20.8859464292824 | 0 | 0 |
| 141 | 7  | 43.7234770704997 | 20.7503234005208 | 0 | 0 |
| 141 | 8  | 43.9616700889801 | 21.2928155155671 | 0 | 0 |
| 141 | 9  | 44.2628336755647 | 21.970930659375  | 0 | 0 |
| 141 | 10 | 45.3032169746749 | 21.5640615730903 | 0 | 0 |
| 142 | 1  | 31.9561943874059 | 24.1283618588177 | 0 | 0 |
| 142 | 2  | 33.5003422313484 | 26.4993569547709 | 0 | 0 |
| 142 | 3  | 36.1615331964408 | 25.8020054559611 | 0 | 0 |
| 142 | 4  | 38.1656399726215 | 25.3835945566753 | 0 | 0 |
| 142 | 5  | 40.062970568104  | 26.4993569547709 | 0 | 0 |
| 142 | 6  | 42.0451745379877 | 26.220416355247  | 0 | 0 |
| 142 | 7  | 44.082135523614  | 26.080946055485  | 0 | 0 |
| 142 | 8  | 46.1820670773443 | 26.4993569547709 | 0 | 0 |
| 142 | 9  | 48.1670088980151 | 26.9177678540567 | 0 | 0 |
| 142 | 10 | 49.8206707734428 | 27.1967084535806 | 0 | 1 |
| 143 | 1  | 22.4969199178645 | 22.709984018601  | 0 | 0 |
| 143 | 2  | 23.5071868583162 | 21.1437782242147 | 0 | 0 |
| 143 | 3  | 28.3285420944559 | 21.3003988036534 | 0 | 0 |
| 143 | 4  | 29.347022587269  | 22.0835017008465 | 0 | 0 |
| 143 | 5  | 30.9952087611225 | 22.0835017008465 | 0 | 0 |
| 143 | 6  | 34.4969199178645 | 22.709984018601  | 0 | 0 |
| 143 | 7  | 39.4962354551677 | 23.4930869157942 | 0 | 0 |
| 143 | 8  | 39.9780971937029 | 23.4930869157942 | 0 | 0 |
| 143 | 9  | 40.476386036961  | 23.4930869157942 | 0 | 0 |
| 143 | 10 | 40.9774127310062 | 23.8063280746714 | 0 | 0 |
| 144 | 1  | 29.8288843258042 | 22.9573806073469 | 0 | 0 |
| 144 | 2  | 32.5941136208077 | 23.8182823801224 | 0 | 0 |
| 144 | 3  | 33.2895277207392 | 24.3922168953061 | 0 | 0 |
| 144 | 4  | 35.4962354551677 | 23.9617660089184 | 0 | 0 |
| 144 | 5  | 36.4490075290897 | 23.2443478649388 | 0 | 0 |
| 144 | 6  | 39.9151266255989 | 24.2487332665102 | 0 | 0 |
| 144 | 7  | 42.3326488706366 | 24.3922168953061 | 0 | 0 |
| 144 | 8  | 45.9986310746064 | 24.1052496377143 | 0 | 0 |
| 144 | 9  | 48.4188911704312 | 24.1052496377143 | 0 | 0 |
| 144 | 10 | 51.2060232717317 | 25.1096350392857 | 0 | 0 |
| 145 | 1  | 33.5112936344969 | 18.7227030779614 | 0 | 0 |
| 145 | 2  | 35.2525667351129 | 21.7893527200413 | 0 | 0 |
| 145 | 3  | 38.6721423682409 | 21.7893527200413 | 0 | 0 |

|     |    |                  |                  |   |   |
|-----|----|------------------|------------------|---|---|
| 145 | 4  | 42.154688569473  | 20.659534430854  | 0 | 0 |
| 145 | 5  | 45.5852156057495 | 20.9823396563361 | 0 | 0 |
| 145 | 6  | 49.9192334017796 | 22.9191710092287 | 0 | 0 |
| 145 | 7  | 51.791923340178  | 22.9191710092287 | 0 | 0 |
| 145 | 8  | 54.9185489390828 | 22.4349631710055 | 0 | 0 |
| 145 | 9  | 55.8631074606434 | 23.5647814601928 | 0 | 0 |
| 145 | 10 | 57.9082819986311 | 23.4033788474518 | 0 | 0 |
| 146 | 1  | 34.4394250513347 | 24.3276740865052 | 0 | 0 |
| 146 | 2  | 36.580424366872  | 24.3276740865052 | 0 | 0 |
| 146 | 3  | 39.0390143737166 | 25.0879139017085 | 0 | 0 |
| 146 | 4  | 40.0109514031485 | 24.3276740865052 | 0 | 0 |
| 146 | 5  | 42.8336755646817 | 25.8481537169118 | 0 | 0 |
| 146 | 6  | 43.5482546201232 | 25.8481537169118 | 0 | 0 |
| 146 | 7  | 44.3121149897331 | 25.8481537169118 | 0 | 0 |
| 146 | 8  | 44.9801505817933 | 25.0879139017085 | 0 | 0 |
| 146 | 9  | 46.1629021218344 | 25.0879139017085 | 0 | 0 |
| 146 | 10 | 47.0527036276523 | 25.0879139017085 | 0 | 0 |
| 147 | 1  | 29.3908281998631 | 20.3788342347826 | 0 | 0 |
| 147 | 2  | 31.4113620807666 | 21.1171977940139 | 0 | 0 |
| 147 | 3  | 31.6386036960986 | 19.6404706755514 | 0 | 0 |
| 147 | 4  | 33.3908281998631 | 20.3788342347826 | 0 | 0 |
| 147 | 5  | 34.8309377138946 | 19.7881433873976 | 0 | 0 |
| 147 | 6  | 35.3839835728953 | 19.7881433873976 | 0 | 0 |
| 147 | 7  | 37.2457221081451 | 20.5265069466289 | 0 | 0 |
| 147 | 8  | 38.3846680355921 | 20.6741796584751 | 0 | 0 |
| 147 | 9  | 40.0766598220397 | 20.9695250821676 | 0 | 0 |
| 147 | 10 | 42.9377138945927 | 21.5602159295526 | 0 | 0 |
| 148 | 1  | 31.419575633128  | 27.0572381538187 | 0 | 0 |
| 148 | 2  | 32.4517453798768 | 27.7545896526284 | 0 | 0 |
| 148 | 3  | 33.5058179329227 | 27.1967084535806 | 0 | 0 |
| 148 | 4  | 35.4934976043806 | 26.4993569547709 | 0 | 0 |
| 148 | 5  | 38.4640657084189 | 25.6625351561992 | 0 | 0 |
| 148 | 6  | 39.460643394935  | 25.8020054559611 | 0 | 0 |
| 148 | 7  | 41.4182067077344 | 25.1046539571514 | 0 | 0 |
| 148 | 8  | 43.3182751540041 | 25.8020054559611 | 0 | 0 |
| 148 | 9  | 45.2511978097194 | 25.3835945566753 | 0 | 0 |
| 148 | 10 | 47.2854209445585 | 25.9414757557231 | 0 | 0 |
| 150 | 1  | 44.0766598220397 | 32.4193287951667 | 0 | 1 |
| 150 | 2  | 49.9164955509925 | 35.9346777006667 | 0 | 1 |
| 150 | 3  | 54.4969199178645 | 34.9581918935833 | 0 | 1 |
| 150 | 4  | 57.1635865845311 | 35.153489055     | 0 | 1 |
| 150 | 5  | 59.9151266255989 | 32.0287344723333 | 0 | 1 |
| 150 | 6  | 63.3292265571526 | 31.6381401495    | 0 | 1 |
| 150 | 7  | 64.7693360711841 | 32.22403163375   | 0 | 1 |
| 150 | 8  | 68.8952772073922 | 32.6146259565833 | 0 | 1 |
| 150 | 9  | 72.1368925393566 | 31.8334373109167 | 0 | 1 |
| 150 | 10 | 75.066392881588  | 32.4193287951667 | 0 | 1 |
| 151 | 1  | 28.1779603011636 | 25.9990161868122 | 0 | 0 |
| 151 | 2  | 34.8884325804244 | 26.3122573456895 | 0 | 0 |
| 151 | 3  | 37.9164955509925 | 27.8784631400757 | 0 | 0 |
| 151 | 4  | 41.0732375085558 | 27.8784631400757 | 0 | 0 |
| 151 | 5  | 44.082135523614  | 28.191704298953  | 0 | 0 |
| 151 | 6  | 45.8507871321013 | 27.5652219811985 | 0 | 0 |
| 151 | 7  | 47.3675564681725 | 27.5652219811985 | 0 | 0 |

|     |    |                  |                  |   |   |
|-----|----|------------------|------------------|---|---|
| 151 | 8  | 49.3634496919918 | 27.5652219811985 | 0 | 0 |
| 151 | 9  | 51.8932238193018 | 27.8784631400757 | 0 | 0 |
| 151 | 10 | 53.4127310061602 | 26.938739663444  | 0 | 0 |
| 152 | 1  | 40.2464065708419 | 25.8270531832653 | 0 | 0 |
| 152 | 2  | 41.242984257358  | 25.9705368120612 | 0 | 0 |
| 152 | 3  | 42.2094455852156 | 26.6879549560408 | 0 | 0 |
| 152 | 4  | 44.4845995893224 | 27.2618894712245 | 0 | 0 |
| 152 | 5  | 45.9164955509925 | 28.2662748727959 | 0 | 0 |
| 152 | 6  | 46.4366872005476 | 27.9793076152041 | 0 | 0 |
| 152 | 7  | 47.4223134839151 | 28.6967257591837 | 0 | 0 |
| 152 | 8  | 48.3969883641342 | 28.4097585015918 | 0 | 0 |
| 152 | 9  | 50.3299110198494 | 28.8402093879796 | 0 | 0 |
| 152 | 10 | 52.3175906913073 | 28.9836930167755 | 0 | 0 |
| 153 | 1  | 33.7467488021903 | 25.0879139017085 | 0 | 0 |
| 153 | 2  | 39.5811088295688 | 27.2165853842777 | 0 | 0 |
| 153 | 3  | 44.4188911704312 | 29.1932089038062 | 0 | 0 |
| 153 | 4  | 47.6632443531828 | 26.9124894581964 | 0 | 0 |
| 153 | 5  | 50.8281998631075 | 30.1054966820502 | 0 | 0 |
| 153 | 6  | 53.7713894592745 | 28.1288731625216 | 0 | 0 |
| 153 | 7  | 63.564681724846  | 31.6259763124567 | 0 | 0 |
| 153 | 8  | 66.3983572895277 | 31.3218803863754 | 0 | 0 |
| 153 | 9  | 67.7207392197125 | 30.2575446450908 | 0 | 0 |
| 153 | 10 | 74.0068446269678 | 31.7780242754974 | 0 | 0 |
| 154 | 1  | 36.0848733744011 | 25.4971294071759 | 0 | 0 |
| 154 | 2  | 37.0130047912389 | 26.3108675797454 | 0 | 1 |
| 154 | 3  | 39.3730321697468 | 26.3108675797454 | 0 | 0 |
| 154 | 4  | 41.1690622861054 | 27.395851809838  | 0 | 0 |
| 154 | 5  | 43.1321013004791 | 26.4464906085069 | 0 | 0 |
| 154 | 6  | 44.0602327173169 | 26.4464906085069 | 0 | 0 |
| 154 | 7  | 44.0684462696783 | 26.4464906085069 | 0 | 0 |
| 154 | 8  | 45.1143052703628 | 26.5821136372685 | 0 | 0 |
| 154 | 9  | 46.0835044490075 | 26.5821136372685 | 0 | 0 |
| 154 | 10 | 47.0718685831622 | 21.6996846018519 | 0 | 1 |
| 155 | 1  | 35.3319644079398 | 23.9626150244734 | 1 | 0 |
| 155 | 2  | 41.1718001368925 | 24.4618361708166 | 1 | 0 |
| 155 | 3  | 47.0006844626968 | 24.9610573171598 | 1 | 0 |
| 155 | 4  | 49.4154688569473 | 26.7915348537515 | 1 | 0 |
| 155 | 5  | 53.0020533880903 | 27.4571630488757 | 1 | 0 |
| 155 | 6  | 56.4271047227926 | 27.1243489513136 | 1 | 0 |
| 155 | 7  | 60.4325804243669 | 28.6220123903432 | 1 | 0 |
| 155 | 8  | 63.6659822039699 | 27.2907560000947 | 1 | 0 |
| 155 | 9  | 66.8720054757016 | 27.6235700976568 | 1 | 0 |
| 155 | 10 | 74.0752908966461 | 28.4556053415621 | 1 | 0 |
| 156 | 1  | 31.1101984941821 | 31.0112694877127 | 0 | 0 |
| 156 | 2  | 31.8384668035592 | 29.0915242337114 | 0 | 0 |
| 156 | 3  | 35.2525667351129 | 25.8427245730939 | 0 | 0 |
| 156 | 4  | 38.9185489390828 | 28.0578152507877 | 0 | 1 |
| 156 | 5  | 42.1656399726215 | 28.6485060981727 | 0 | 0 |
| 156 | 6  | 45.3798767967146 | 30.4205786403277 | 0 | 0 |
| 156 | 7  | 47.0006844626968 | 26.5810881323251 | 0 | 0 |
| 156 | 8  | 48.5776865160849 | 27.4671244034026 | 0 | 0 |
| 156 | 9  | 51.0006844626968 | 28.3531606744802 | 0 | 0 |
| 156 | 10 | 52.9226557152635 | 28.9438515218652 | 0 | 0 |
| 157 | 1  | 40.2108145106092 | 24.5331971366391 | 0 | 0 |

|     |    |                  |                  |   |   |
|-----|----|------------------|------------------|---|---|
| 157 | 2  | 40.3422313483915 | 24.5331971366391 | 0 | 1 |
| 157 | 3  | 41.2101300479124 | 26.4700284895317 | 0 | 0 |
| 157 | 4  | 42.2094455852156 | 27.1156389404959 | 0 | 0 |
| 157 | 5  | 48.7720739219713 | 25.0174049748623 | 0 | 0 |
| 157 | 6  | 49.0924024640657 | 25.0174049748623 | 0 | 0 |
| 157 | 7  | 52.9144421629021 | 25.0174049748623 | 0 | 1 |
| 157 | 8  | 54.2614647501711 | 26.1472232640496 | 0 | 0 |
| 157 | 9  | 57.4318959616701 | 25.5016128130854 | 0 | 1 |
| 157 | 10 | 59.8631074606434 | 22.5963657837466 | 0 | 1 |
| 159 | 1  | 31.9151266255989 | 21.4284385443287 | 0 | 0 |
| 159 | 2  | 33.5468856947296 | 26.4464906085069 | 0 | 0 |
| 159 | 3  | 34.3518138261465 | 25.7683754646991 | 0 | 0 |
| 159 | 4  | 35.5811088295688 | 25.0902603208912 | 0 | 0 |
| 159 | 5  | 37.3388090349076 | 26.4464906085069 | 0 | 1 |
| 159 | 6  | 37.3607118412047 | 26.5821136372685 | 0 | 1 |
| 159 | 7  | 38.1875427789185 | 25.2258833496528 | 0 | 0 |
| 159 | 8  | 39.1457905544148 | 25.7683754646991 | 0 | 0 |
| 159 | 9  | 39.523613963039  | 26.4464906085069 | 0 | 0 |
| 159 | 10 | 40.0246406570842 | 26.9889827235532 | 0 | 1 |
| 160 | 1  | 33.5167693360712 | 23.1008642361429 | 0 | 0 |
| 160 | 2  | 36.0657084188912 | 21.9529952057755 | 0 | 0 |
| 160 | 3  | 36.5420944558522 | 22.5269297209592 | 0 | 0 |
| 160 | 4  | 39.5455167693361 | 22.0964788345714 | 0 | 0 |
| 160 | 5  | 40.6872005475702 | 22.9573806073469 | 0 | 0 |
| 160 | 6  | 41.6837782340862 | 21.6660279481837 | 0 | 1 |
| 160 | 7  | 44.8240930869268 | 22.5269297209592 | 0 | 0 |
| 160 | 8  | 47.8001368925394 | 22.813896978551  | 0 | 0 |
| 160 | 9  | 49.5578370978782 | 21.9529952057755 | 0 | 0 |
| 160 | 10 | 50.8199863107461 | 21.8095115769796 | 0 | 0 |
| 161 | 1  | 29.5277207392197 | 24.3922168953061 | 1 | 0 |
| 161 | 2  | 38.6694045174538 | 25.8270531832653 | 1 | 0 |
| 161 | 3  | 41.9986310746064 | 25.8270531832653 | 1 | 0 |
| 161 | 4  | 48               | 25.8270531832653 | 1 | 0 |
| 161 | 5  | 49.9986310746064 | 24.9661514104898 | 1 | 0 |
| 161 | 6  | 52.0547570157426 | 24.8226677816939 | 1 | 0 |
| 161 | 7  | 55.7754962354552 | 25.1096350392857 | 1 | 0 |
| 161 | 8  | 58.570841889117  | 24.535700524102  | 1 | 0 |
| 161 | 9  | 61.5222450376454 | 25.1096350392857 | 1 | 0 |
| 161 | 10 | 65.7577002053388 | 23.1008642361429 | 1 | 0 |
| 163 | 1  | 28.580424366872  | 25.6835695544694 | 0 | 1 |
| 163 | 2  | 28.6406570841889 | 25.6835695544694 | 0 | 1 |
| 163 | 3  | 30.8309377138946 | 25.6835695544694 | 0 | 0 |
| 163 | 4  | 36               | 27.9793076152041 | 0 | 0 |
| 163 | 5  | 40.9993155373032 | 27.9793076152041 | 0 | 1 |
| 163 | 6  | 44.8323066392882 | 28.2662748727959 | 0 | 0 |
| 163 | 7  | 47.3292265571526 | 28.122791244     | 0 | 1 |
| 163 | 8  | 50.4284736481862 | 29.4141439031633 | 0 | 0 |
| 163 | 9  | 53.3716632443532 | 29.9880784183469 | 0 | 1 |
| 163 | 10 | 56.7145790554415 | 30.1315620471429 | 0 | 1 |
| 164 | 1  | 23.5400410677618 | 26.4993569547709 | 0 | 0 |
| 164 | 2  | 24.1834360027378 | 26.4993569547709 | 0 | 0 |
| 164 | 3  | 27.6495550992471 | 30.1255847485816 | 0 | 0 |
| 164 | 4  | 28.1259411362081 | 26.7782975542948 | 0 | 0 |
| 164 | 5  | 30.1026694045175 | 25.8020054559611 | 0 | 0 |



|     |    |                  |                  |   |   |
|-----|----|------------------|------------------|---|---|
| 164 | 6  | 30.6420260095825 | 25.5230648564372 | 0 | 0 |
| 164 | 7  | 34.1245722108145 | 24.9651836573894 | 0 | 1 |
| 164 | 8  | 34.5242984257358 | 26.220416355247  | 0 | 1 |
| 164 | 9  | 35.0143737166324 | 25.6625351561992 | 0 | 1 |
| 164 | 10 | 35.4031485284052 | 25.1046539571514 | 0 | 0 |
| 165 | 1  | 25.5879534565366 | 23.2443478649388 | 0 | 0 |
| 165 | 2  | 26.2751540041068 | 23.2443478649388 | 0 | 0 |
| 165 | 3  | 28.8268309377139 | 23.6747987513265 | 0 | 0 |
| 165 | 4  | 28.9171800136893 | 22.9573806073469 | 0 | 0 |
| 165 | 5  | 29.6728268309377 | 22.9573806073469 | 0 | 0 |
| 165 | 6  | 33.1882272416153 | 22.9573806073469 | 0 | 0 |
| 165 | 7  | 37.0020533880903 | 22.9573806073469 | 0 | 0 |
| 165 | 8  | 41.9164955509925 | 24.1052496377143 | 0 | 0 |
| 165 | 9  | 43.8795345653662 | 24.1052496377143 | 0 | 0 |
| 165 | 10 | 45.9164955509925 | 25.1096350392857 | 0 | 0 |
| 167 | 1  | 34.9185489390828 | 28.3424451942555 | 0 | 0 |
| 167 | 2  | 37.1471594798084 | 27.456743781935  | 0 | 0 |
| 167 | 3  | 38.3600273785079 | 27.1024632170068 | 0 | 0 |
| 167 | 4  | 39.8329911019849 | 27.1024632170068 | 0 | 0 |
| 167 | 5  | 43.8329911019849 | 26.9253229345427 | 0 | 0 |
| 167 | 6  | 47.2470910335387 | 27.456743781935  | 0 | 0 |
| 167 | 7  | 51.0006844626968 | 27.456743781935  | 0 | 0 |
| 167 | 8  | 53.0841889117043 | 27.456743781935  | 0 | 1 |
| 167 | 9  | 56.807665982204  | 25.685340957294  | 0 | 0 |
| 167 | 10 | 57.3853524982888 | 24.7996395449735 | 0 | 0 |
| 168 | 1  | 26.8281998631075 | 22.3967428597238 | 0 | 0 |
| 168 | 2  | 27.7864476386037 | 22.709984018601  | 0 | 0 |
| 168 | 3  | 27.8110882956879 | 18.4812283737581 | 0 | 0 |
| 168 | 4  | 28.1916495550992 | 22.709984018601  | 0 | 0 |
| 168 | 5  | 29.0075290896646 | 25.3725338690577 | 0 | 0 |
| 168 | 6  | 30.2012320328542 | 26.6254985045667 | 0 | 0 |
| 168 | 7  | 30.9924709103354 | 26.6254985045667 | 0 | 0 |
| 168 | 8  | 33.1498973305955 | 27.2519808223212 | 0 | 0 |
| 168 | 9  | 35.1238877481177 | 27.8784631400757 | 0 | 0 |
| 168 | 10 | 37.7494866529774 | 27.8784631400757 | 0 | 0 |
| 169 | 1  | 26.6967830253251 | 24.1290220732544 | 0 | 0 |
| 169 | 2  | 33.5030800821355 | 25.626685512284  | 0 | 0 |
| 169 | 3  | 36.5420944558522 | 26.9579419025325 | 0 | 0 |
| 169 | 4  | 39.6714579055441 | 26.9579419025325 | 0 | 0 |
| 169 | 5  | 40.5941136208077 | 27.4571630488757 | 0 | 0 |
| 169 | 6  | 41.5633127994524 | 27.2907560000947 | 0 | 0 |
| 169 | 7  | 42.6365503080082 | 28.2891982927811 | 0 | 0 |
| 169 | 8  | 42.7323750855578 | 28.2891982927811 | 0 | 0 |
| 169 | 9  | 43.7563312799452 | 26.9579419025325 | 0 | 0 |
| 169 | 10 | 44.5530458590007 | 29.1212335366864 | 0 | 0 |
| 170 | 1  | 23.1485284052019 | 22.1509067769376 | 0 | 0 |
| 170 | 2  | 27.5811088295688 | 23.3322884717076 | 0 | 0 |
| 170 | 3  | 28.0027378507871 | 23.6276338954001 | 0 | 0 |
| 170 | 4  | 31.0335386721424 | 25.1043610138626 | 0 | 0 |
| 170 | 5  | 31.1649555099247 | 25.1043610138626 | 0 | 0 |
| 170 | 6  | 34.2450376454483 | 23.7753066072464 | 0 | 0 |
| 170 | 7  | 37.2457221081451 | 24.0706520309389 | 0 | 0 |
| 170 | 8  | 40.3285420944559 | 24.2183247427851 | 0 | 0 |
| 170 | 9  | 42.8090349075975 | 25.1043610138626 | 0 | 0 |

|     |    |                  |                  |   |   |
|-----|----|------------------|------------------|---|---|
| 170 | 10 | 43.8329911019849 | 23.9229793190926 | 0 | 0 |
| 172 | 1  | 37.8973305954825 | 24.4328103924259 | 0 | 0 |
| 172 | 2  | 40.1670088980151 | 25.3725338690577 | 0 | 0 |
| 172 | 3  | 42.4339493497604 | 27.2519808223212 | 0 | 0 |
| 172 | 4  | 44.3340177960301 | 27.2519808223212 | 0 | 0 |
| 172 | 5  | 46.2614647501711 | 26.6254985045667 | 0 | 0 |
| 172 | 6  | 48.1889117043121 | 26.6254985045667 | 0 | 1 |
| 172 | 7  | 51.5865845311431 | 26.3122573456895 | 0 | 1 |
| 172 | 8  | 52.145106091718  | 26.3122573456895 | 0 | 1 |
| 172 | 9  | 55.1676933607118 | 27.8784631400757 | 0 | 0 |
| 172 | 10 | 57.7522245037645 | 27.8784631400757 | 0 | 0 |
| 173 | 1  | 23.917864476386  | 29.5366781316116 | 0 | 0 |
| 173 | 2  | 28.2464065708419 | 28.0840546169422 | 0 | 0 |
| 173 | 3  | 29.2511978097194 | 27.9226520042011 | 0 | 0 |
| 173 | 4  | 32.9993155373032 | 28.7296650679063 | 0 | 0 |
| 173 | 5  | 35.0006844626968 | 28.7296650679063 | 0 | 0 |
| 173 | 6  | 38.9185489390828 | 26.4700284895317 | 0 | 0 |
| 173 | 7  | 41.7549623545517 | 29.0524702933884 | 0 | 0 |
| 173 | 8  | 44.7200547570157 | 29.5366781316116 | 0 | 0 |
| 173 | 9  | 46.9322381930185 | 28.7296650679063 | 0 | 0 |
| 173 | 10 | 50.6475017111567 | 31.6349120972452 | 0 | 0 |
| 174 | 1  | 26.9158110882957 | 25.8270531832653 | 0 | 0 |
| 174 | 2  | 28.6954140999316 | 25.8270531832653 | 0 | 0 |
| 174 | 3  | 35.0855578370979 | 26.5444713272449 | 0 | 0 |
| 174 | 4  | 39.5811088295688 | 27.5488567288163 | 0 | 0 |
| 174 | 5  | 42.2368240930869 | 27.5488567288163 | 0 | 0 |
| 174 | 6  | 46.0835044490075 | 27.4053731000204 | 0 | 0 |
| 174 | 7  | 49.0102669404517 | 27.4053731000204 | 0 | 0 |
| 174 | 8  | 52.1834360027378 | 23.2443478649388 | 0 | 0 |
| 174 | 9  | 55.5318275154004 | 22.9573806073469 | 0 | 0 |
| 174 | 10 | 58.0643394934976 | 22.9573806073469 | 0 | 0 |
| 175 | 1  | 28.2518822724162 | 22.2421767168981 | 0 | 0 |
| 175 | 2  | 30.2395619438741 | 22.3777997456597 | 0 | 0 |
| 175 | 3  | 33.9219712525667 | 21.021569458044  | 0 | 0 |
| 175 | 4  | 36.394250513347  | 17.3597476814815 | 0 | 0 |
| 175 | 5  | 37.9192334017796 | 24.1408991195602 | 0 | 0 |
| 175 | 6  | 37.9986310746064 | 24.1408991195602 | 0 | 0 |
| 175 | 7  | 42.4969199178645 | 24.8190142633681 | 0 | 0 |
| 175 | 8  | 45.9164955509925 | 24.6833912346065 | 0 | 0 |
| 175 | 9  | 49.1663244353183 | 26.1752445509838 | 0 | 0 |
| 175 | 10 | 52.3969883641342 | 26.5821136372685 | 0 | 1 |
| 176 | 1  | 24.3340177960301 | 22.5134227744213 | 0 | 0 |
| 176 | 2  | 26.8501026694045 | 26.0396215222222 | 0 | 0 |
| 176 | 3  | 27.1321013004791 | 27.8027208961227 | 0 | 0 |
| 176 | 4  | 29.0732375085558 | 24.4121451770833 | 0 | 0 |
| 176 | 5  | 29.9986310746064 | 25.7683754646991 | 0 | 0 |
| 176 | 6  | 30.9048596851472 | 26.1752445509838 | 0 | 0 |
| 176 | 7  | 33.2758384668036 | 25.7683754646991 | 0 | 0 |
| 176 | 8  | 35.1676933607118 | 24.4121451770833 | 0 | 0 |
| 176 | 9  | 38.1464750171116 | 23.0559148894676 | 0 | 0 |
| 176 | 10 | 38.8856947296372 | 24.4121451770833 | 0 | 0 |
| 177 | 1  | 27.0773442847365 | 21.021569458044  | 1 | 0 |
| 177 | 2  | 28.9911019849418 | 20.3434543142361 | 1 | 0 |
| 177 | 3  | 34.9158110882957 | 23.7340300332755 | 1 | 0 |

|     |    |                  |                  |   |   |
|-----|----|------------------|------------------|---|---|
| 177 | 4  | 39.4962354551677 | 24.2765221483218 | 1 | 0 |
| 177 | 5  | 42.2450376454483 | 23.7340300332755 | 1 | 0 |
| 177 | 6  | 45.5797399041752 | 24.4121451770833 | 1 | 0 |
| 177 | 7  | 48.4654346338125 | 24.4121451770833 | 1 | 0 |
| 177 | 8  | 51.8412046543463 | 24.8190142633681 | 1 | 0 |
| 177 | 9  | 54.5434633812457 | 23.3271609469907 | 1 | 0 |
| 177 | 10 | 55.2881587953457 | 22.3777997456597 | 1 | 0 |
| 178 | 1  | 30.6721423682409 | 24.0117658397823 | 0 | 0 |
| 178 | 2  | 37.6728268309377 | 27.1781525439294 | 0 | 0 |
| 178 | 3  | 39.6714579055441 | 26.6504214265716 | 0 | 0 |
| 178 | 4  | 42.4339493497604 | 27.3100853232689 | 0 | 1 |
| 178 | 5  | 43.2525667351129 | 26.3865558678927 | 0 | 0 |
| 178 | 6  | 46.4202600958248 | 27.9697492199662 | 0 | 0 |
| 178 | 7  | 49.5030800821355 | 27.1781525439294 | 0 | 1 |
| 178 | 8  | 52.0054757015743 | 29.2890770133609 | 0 | 1 |
| 178 | 9  | 55.5920602327173 | 25.067228074498  | 0 | 1 |
| 178 | 10 | 61.5633127994524 | 31.6638670414712 | 0 | 1 |
| 179 | 1  | 29.4976043805613 | 20.1753265926309 | 0 | 0 |
| 179 | 2  | 35.9151266255989 | 22.2735605582645 | 0 | 0 |
| 179 | 3  | 40.331279945243  | 22.9191710092287 | 0 | 0 |
| 179 | 4  | 44.331279945243  | 22.9191710092287 | 0 | 0 |
| 179 | 5  | 47.1676933607118 | 23.4033788474518 | 0 | 0 |
| 179 | 6  | 50.4969199178645 | 23.7261840729339 | 0 | 0 |
| 179 | 7  | 53.2320328542094 | 24.6945997493802 | 0 | 0 |
| 179 | 8  | 56.3915126625599 | 25.0174049748623 | 0 | 0 |
| 179 | 9  | 58.217659137577  | 24.6945997493802 | 0 | 0 |
| 179 | 10 | 60.8377823408624 | 24.5331971366391 | 0 | 0 |
| 180 | 1  | 51.4551676933607 | 29.6493527929282 | 1 | 1 |
| 180 | 2  | 57.5770020533881 | 28.8891129777249 | 1 | 1 |
| 180 | 3  | 63.0828199863107 | 29.8014007559689 | 1 | 1 |
| 180 | 4  | 67.5783709787817 | 29.1932089038062 | 1 | 0 |
| 180 | 5  | 71.4113620807666 | 28.2809211255623 | 1 | 1 |
| 180 | 6  | 74.9130732375086 | 26.9124894581964 | 1 | 1 |
| 180 | 7  | 77.9164955509925 | 28.1288731625216 | 1 | 1 |
| 180 | 8  | 80.9253935660506 | 28.8891129777249 | 1 | 1 |
| 180 | 9  | 83.1759069130732 | 28.8891129777249 | 1 | 1 |
| 180 | 10 | 87.9534565366188 | 24.3276740865052 | 1 | 1 |
| 181 | 1  | 28.37234770705   | 25.1043610138626 | 0 | 0 |
| 181 | 2  | 35.0828199863107 | 27.3194516915564 | 0 | 0 |
| 181 | 3  | 35.1375770020534 | 27.3194516915564 | 0 | 0 |
| 181 | 4  | 37.0704996577687 | 27.3194516915564 | 0 | 0 |
| 181 | 5  | 38.5845311430527 | 27.7624698270951 | 0 | 0 |
| 181 | 6  | 41.8809034907598 | 29.0915242337114 | 0 | 1 |
| 181 | 7  | 42.9158110882957 | 28.0578152507877 | 0 | 0 |
| 181 | 8  | 48.9993155373032 | 28.6485060981727 | 0 | 1 |
| 181 | 9  | 51.2498288843258 | 24.8090155901701 | 0 | 1 |
| 181 | 10 | 55.6002737850787 | 29.0915242337114 | 0 | 1 |
| 183 | 1  | 24.7529089664613 | 20.7810746645308 | 0 | 0 |
| 183 | 2  | 27.917864476386  | 21.1994855638167 | 0 | 0 |
| 183 | 3  | 29.6180698151951 | 21.1994855638167 | 0 | 0 |
| 183 | 4  | 30.8336755646817 | 20.6416043647689 | 0 | 0 |
| 183 | 5  | 31.813826146475  | 21.3389558635787 | 0 | 0 |
| 183 | 6  | 32.498288843258  | 21.4784261633406 | 0 | 0 |
| 183 | 7  | 35.6002737850787 | 22.5941885614362 | 0 | 0 |

|     |    |                  |                  |   |   |
|-----|----|------------------|------------------|---|---|
| 183 | 8  | 38.6666666666667 | 22.5941885614362 | 0 | 0 |
| 183 | 9  | 42.0013689253936 | 23.8494212592938 | 0 | 0 |
| 183 | 10 | 44               | 23.9888915590557 | 0 | 0 |
| 184 | 1  | 25.0869267624914 | 20.1857152389379 | 0 | 0 |
| 184 | 2  | 28.8268309377139 | 22.4285724877088 | 0 | 0 |
| 184 | 3  | 29.7522245037645 | 22.9563036050666 | 0 | 0 |
| 184 | 4  | 31.5975359342916 | 23.4840347224245 | 0 | 0 |
| 184 | 5  | 34.590006844627  | 24.4075641778007 | 0 | 0 |
| 184 | 6  | 37.9192334017796 | 24.5394969571402 | 0 | 0 |
| 184 | 7  | 40.8350444900753 | 25.8588247505348 | 0 | 1 |
| 184 | 8  | 42.839151266256  | 25.7268919711953 | 0 | 0 |
| 184 | 9  | 44.8350444900753 | 25.4630264125164 | 0 | 0 |
| 184 | 10 | 45.3305954825462 | 25.8588247505348 | 0 | 0 |
| 186 | 1  | 27.1184120465435 | 22.0032340650914 | 0 | 0 |
| 186 | 2  | 28.1615331964408 | 20.9695250821676 | 0 | 0 |
| 186 | 3  | 28.9226557152635 | 21.4125432177064 | 0 | 0 |
| 186 | 4  | 32.1943874058864 | 21.4125432177064 | 0 | 0 |
| 186 | 5  | 33.409993155373  | 22.1509067769376 | 0 | 0 |
| 186 | 6  | 34.1300479123888 | 22.2985794887839 | 0 | 0 |
| 186 | 7  | 35.0198494182067 | 22.7415976243226 | 0 | 0 |
| 186 | 8  | 36.0082135523614 | 23.3322884717076 | 0 | 0 |
| 186 | 9  | 36.9664613278576 | 23.3322884717076 | 0 | 0 |
| 186 | 10 | 38.1601642710472 | 23.9229793190926 | 0 | 0 |
| 187 | 1  | 26.0451745379877 | 22.2399624633673 | 0 | 0 |
| 187 | 2  | 29.3278576317591 | 23.2443478649388 | 0 | 0 |
| 187 | 3  | 33.0239561943874 | 22.3834460921633 | 0 | 0 |
| 187 | 4  | 36.082135523614  | 23.8182823801224 | 0 | 0 |
| 187 | 5  | 38.7953456536619 | 24.679184152898  | 0 | 0 |
| 187 | 6  | 39.3018480492813 | 24.2487332665102 | 0 | 0 |
| 187 | 7  | 39.7481177275838 | 24.2487332665102 | 0 | 0 |
| 187 | 8  | 39.8110882956879 | 22.9573806073469 | 0 | 0 |
| 187 | 9  | 42.9404517453799 | 20.5181589178163 | 0 | 0 |
| 187 | 10 | 43.9151266255989 | 22.2399624633673 | 0 | 0 |
| 189 | 1  | 27.0828199863107 | 27.0953602428826 | 1 | 0 |
| 189 | 2  | 28.3641341546886 | 27.0953602428826 | 1 | 0 |
| 189 | 3  | 29.4428473648186 | 27.4086014017599 | 1 | 1 |
| 189 | 4  | 31.3894592744695 | 27.2519808223212 | 1 | 1 |
| 189 | 5  | 34.2313483915127 | 30.0711512522165 | 1 | 0 |
| 189 | 6  | 34.9377138945927 | 29.1314277755848 | 1 | 0 |
| 189 | 7  | 35.9863107460643 | 29.1314277755848 | 1 | 0 |
| 189 | 8  | 42.0999315537303 | 30.5410129905324 | 1 | 1 |
| 189 | 9  | 44.8186173853525 | 29.444668934462  | 1 | 1 |
| 189 | 10 | 46.4750171115674 | 36.8058361680775 | 1 | 1 |
| 191 | 1  | 35.0855578370979 | 26.6083935321151 | 0 | 0 |
| 191 | 2  | 38.154688569473  | 25.0879139017085 | 0 | 0 |
| 191 | 3  | 41.1690622861054 | 25.0879139017085 | 0 | 0 |
| 191 | 4  | 44.498288843258  | 27.3686333473183 | 0 | 0 |
| 191 | 5  | 47.7426420260096 | 23.7194822343426 | 0 | 0 |
| 191 | 6  | 49.6673511293634 | 28.7370650146843 | 0 | 0 |
| 191 | 7  | 51.8083504449008 | 28.5850170516436 | 0 | 0 |
| 191 | 8  | 53.8343600273785 | 27.3686333473183 | 0 | 0 |
| 191 | 9  | 55.917864476386  | 26.6083935321151 | 0 | 1 |
| 191 | 10 | 57.9356605065024 | 27.6727292733997 | 0 | 0 |
| 193 | 1  | 27.9151266255989 | 23.0882363844061 | 0 | 0 |

|     |    |                  |                  |   |   |
|-----|----|------------------|------------------|---|---|
| 193 | 2  | 28.5530458590007 | 24.8033625158191 | 0 | 0 |
| 193 | 3  | 29.4592744695414 | 25.4630264125164 | 0 | 0 |
| 193 | 4  | 30.7789185489391 | 25.4630264125164 | 0 | 0 |
| 193 | 5  | 34.1711156741958 | 25.5949591918559 | 0 | 0 |
| 193 | 6  | 35.7043121149897 | 25.5949591918559 | 0 | 0 |
| 193 | 7  | 36.6023271731691 | 27.04621976459   | 0 | 0 |
| 193 | 8  | 37.0650239561944 | 26.1226903092137 | 0 | 0 |
| 193 | 9  | 38.0807665982204 | 26.6504214265716 | 0 | 0 |
| 193 | 10 | 39.0335386721424 | 27.1781525439294 | 0 | 0 |
| 194 | 1  | 28.1943874058864 | 23.7194822343426 | 0 | 0 |
| 194 | 2  | 30.0835044490075 | 23.4153863082612 | 0 | 0 |
| 194 | 3  | 31.9671457905544 | 22.655146493058  | 0 | 0 |
| 194 | 4  | 33.9986310746064 | 24.0235781604239 | 0 | 0 |
| 194 | 5  | 36.4955509924709 | 23.2633383452206 | 0 | 0 |
| 194 | 6  | 38.4914442162902 | 23.8715301973832 | 0 | 0 |
| 194 | 7  | 40.5037645448323 | 24.3276740865052 | 0 | 0 |
| 194 | 8  | 42.4969199178645 | 24.6317700125865 | 0 | 0 |
| 194 | 9  | 44.4188911704312 | 27.2165853842777 | 0 | 0 |
| 194 | 10 | 47.4168377823409 | 24.6317700125865 | 0 | 0 |
| 195 | 1  | 25.0841889117043 | 22.8731291609601 | 0 | 0 |
| 195 | 2  | 28.145106091718  | 21.1994855638167 | 0 | 0 |
| 195 | 3  | 30.0013689253936 | 21.1994855638167 | 0 | 0 |
| 195 | 4  | 31.9972621492129 | 22.0363073623884 | 0 | 0 |
| 195 | 5  | 33.990417522245  | 22.0363073623884 | 0 | 0 |
| 195 | 6  | 36               | 21.3389558635787 | 0 | 0 |
| 195 | 7  | 38.2642026009582 | 20.9205449642928 | 0 | 0 |
| 195 | 8  | 40               | 19.8047825661972 | 0 | 0 |
| 195 | 9  | 41.7111567419576 | 20.223193465483  | 0 | 0 |
| 195 | 10 | 43.2525667351129 | 20.362663765245  | 0 | 0 |
| 196 | 1  | 26.0835044490075 | 23.4310103600079 | 0 | 0 |
| 196 | 2  | 28.1314168377823 | 24.5467727581036 | 0 | 0 |
| 196 | 3  | 28.4161533196441 | 24.4073024583416 | 0 | 0 |
| 196 | 4  | 30.1273100616016 | 23.152069760484  | 0 | 0 |
| 196 | 5  | 31.0006844626968 | 23.8494212592938 | 0 | 0 |
| 196 | 6  | 32.0136892539357 | 23.4310103600079 | 0 | 0 |
| 196 | 7  | 34.009582477755  | 23.0125994607221 | 0 | 0 |
| 196 | 8  | 35.9151266255989 | 22.7336588611982 | 0 | 0 |
| 196 | 9  | 37.9383983572895 | 24.4073024583416 | 0 | 0 |
| 196 | 10 | 39.9151266255989 | 24.8257133576275 | 0 | 0 |
| 197 | 1  | 28.6652977412731 | 23.4033788474518 | 0 | 0 |
| 197 | 2  | 38.3353867214237 | 24.210391911157  | 0 | 0 |
| 197 | 3  | 41.9164955509925 | 24.210391911157  | 0 | 0 |
| 197 | 4  | 45.3360711841205 | 24.210391911157  | 0 | 0 |
| 197 | 5  | 47.750855578371  | 24.048989298416  | 0 | 1 |
| 197 | 6  | 50.5681040383299 | 24.5331971366391 | 0 | 0 |
| 197 | 7  | 53.4209445585216 | 24.6945997493802 | 0 | 1 |
| 197 | 8  | 56.4380561259411 | 24.210391911157  | 0 | 0 |
| 197 | 9  | 59.9561943874059 | 25.3402102003444 | 0 | 1 |
| 197 | 10 | 61.7796030116359 | 25.3402102003444 | 0 | 1 |
| 198 | 1  | 30.8090349075975 | 25.067228074498  | 0 | 0 |
| 198 | 2  | 31.337440109514  | 25.7268919711953 | 0 | 0 |
| 198 | 3  | 34.6036960985626 | 24.4075641778007 | 0 | 0 |
| 198 | 4  | 38.1601642710472 | 25.1991608538375 | 0 | 0 |
| 198 | 5  | 41.3223819301848 | 25.8588247505348 | 0 | 0 |

|     |    |                  |                  |   |   |
|-----|----|------------------|------------------|---|---|
| 198 | 6  | 44.7802874743326 | 25.8588247505348 | 0 | 1 |
| 198 | 7  | 46.7898699520876 | 26.1226903092137 | 0 | 1 |
| 198 | 8  | 49.4757015742642 | 27.7058836612873 | 0 | 1 |
| 198 | 9  | 51.8877481177276 | 26.9142869852505 | 0 | 1 |
| 198 | 10 | 52.1423682409309 | 25.5949591918559 | 0 | 1 |
| 201 | 1  | 35.356605065024  | 21.1994855638167 | 0 | 0 |
| 201 | 2  | 37.3278576317591 | 21.4784261633406 | 0 | 0 |
| 201 | 3  | 38.0205338809035 | 21.0600152640548 | 0 | 0 |
| 201 | 4  | 39.9890485968515 | 20.362663765245  | 0 | 0 |
| 201 | 5  | 40.974674880219  | 20.9205449642928 | 0 | 0 |
| 201 | 6  | 42.0807665982204 | 20.9205449642928 | 0 | 0 |
| 201 | 7  | 43.4387405886379 | 21.7573667628645 | 0 | 0 |
| 201 | 8  | 45.1115674195756 | 20.9205449642928 | 0 | 0 |
| 201 | 9  | 47.1649555099247 | 23.7099509595318 | 0 | 1 |
| 201 | 10 | 52               | 22.1757776621504 | 0 | 0 |
| 202 | 1  | 48.3285420944559 | 24.8226677816939 | 1 | 0 |
| 202 | 2  | 55.1731690622861 | 23.6747987513265 | 1 | 1 |
| 202 | 3  | 57.0130047912389 | 27.6923403576122 | 1 | 0 |
| 202 | 4  | 58.3600273785079 | 29.1271766455714 | 1 | 1 |
| 202 | 5  | 60.331279945243  | 28.6967257591837 | 1 | 1 |
| 202 | 6  | 63.088295687885  | 27.5488567288163 | 1 | 0 |
| 202 | 7  | 65.7932922655715 | 27.9793076152041 | 1 | 1 |
| 202 | 8  | 68.8104038329911 | 26.5444713272449 | 1 | 1 |
| 202 | 9  | 71.7837097878166 | 24.679184152898  | 1 | 0 |
| 202 | 10 | 74.9075975359343 | 22.2399624633673 | 1 | 1 |
| 203 | 1  | 29.07871321013   | 25.8244180385675 | 0 | 0 |
| 203 | 2  | 29.4647501711157 | 25.8244180385675 | 0 | 0 |
| 203 | 3  | 31.0937713894593 | 26.7928337150138 | 0 | 0 |
| 203 | 4  | 33.0294318959617 | 25.5016128130854 | 0 | 0 |
| 203 | 5  | 33.3305954825462 | 25.1788075876033 | 0 | 0 |
| 203 | 6  | 35.2717316906229 | 24.048989298416  | 0 | 0 |
| 203 | 7  | 36.1697467488022 | 24.210391911157  | 0 | 0 |
| 203 | 8  | 37.2128678986995 | 25.9858206513085 | 0 | 0 |
| 203 | 9  | 39.2717316906229 | 26.1472232640496 | 0 | 0 |
| 203 | 10 | 41.5770020533881 | 27.1156389404959 | 0 | 0 |
| 204 | 1  | 40.4188911704312 | 27.8247772364403 | 0 | 0 |
| 204 | 2  | 42.4147843942505 | 26.9124894581964 | 0 | 0 |
| 204 | 3  | 45.533196440794  | 28.2809211255623 | 0 | 0 |
| 204 | 4  | 48.8350444900753 | 26.1522496429931 | 0 | 0 |
| 204 | 5  | 52.9199178644764 | 27.520681310359  | 0 | 0 |
| 204 | 6  | 55.2799452429843 | 28.5850170516436 | 0 | 0 |
| 204 | 7  | 57.3388090349076 | 27.6727292733997 | 0 | 0 |
| 204 | 8  | 57.8343600273785 | 27.064537421237  | 0 | 0 |
| 204 | 9  | 58.3463381245722 | 27.064537421237  | 0 | 0 |
| 204 | 10 | 61.0869267624914 | 27.520681310359  | 0 | 1 |
| 206 | 1  | 31.7481177275838 | 25.5440577908304 | 0 | 0 |
| 206 | 2  | 31.9972621492129 | 23.7194822343426 | 0 | 0 |
| 206 | 3  | 34.9869952087611 | 24.7838179756272 | 0 | 0 |
| 206 | 4  | 35.0362765229295 | 24.1756261234645 | 0 | 0 |
| 206 | 5  | 35.9069130732375 | 25.0879139017085 | 0 | 0 |
| 206 | 6  | 36.9828884325804 | 25.3920098277898 | 0 | 0 |
| 206 | 7  | 37.1909650924025 | 24.1756261234645 | 0 | 1 |
| 206 | 8  | 38.1683778234086 | 25.5440577908304 | 0 | 1 |
| 206 | 9  | 38.8254620123203 | 25.8481537169118 | 0 | 1 |

|     |    |                  |                  |   |   |
|-----|----|------------------|------------------|---|---|
| 206 | 10 | 40.0164271047228 | 26.7604414951557 | 0 | 0 |
| 207 | 1  | 41.2676249144422 | 24.6613428783239 | 1 | 0 |
| 207 | 2  | 46.9979466119097 | 22.1509067769376 | 1 | 0 |
| 207 | 3  | 47.0718685831622 | 24.5136701664776 | 1 | 0 |
| 207 | 4  | 50.8939082819986 | 24.0706520309389 | 1 | 0 |
| 207 | 5  | 54.0944558521561 | 26.2857427086326 | 1 | 0 |
| 207 | 6  | 54.4312114989733 | 26.5810881323251 | 1 | 1 |
| 207 | 7  | 58.8090349075975 | 25.6950518612476 | 1 | 0 |
| 207 | 8  | 61.6180698151951 | 25.2520337257089 | 1 | 0 |
| 207 | 9  | 64.7118412046543 | 26.7287608441714 | 1 | 0 |
| 207 | 10 | 67.3894592744695 | 27.6147971152489 | 1 | 0 |
| 208 | 1  | 25.5852156057495 | 19.9006238258766 | 0 | 0 |
| 208 | 2  | 28.1670088980151 | 19.9006238258766 | 0 | 0 |
| 208 | 3  | 34.2532511978097 | 20.7993616760774 | 0 | 0 |
| 208 | 4  | 34.7898699520876 | 21.6980995262783 | 0 | 0 |
| 208 | 5  | 39.2525667351129 | 22.4684462550219 | 0 | 0 |
| 208 | 6  | 41.9329226557153 | 21.569708404821  | 0 | 0 |
| 208 | 7  | 44.5859000684463 | 22.8536196193937 | 0 | 0 |
| 208 | 8  | 48.2984257357974 | 22.5968373764792 | 0 | 0 |
| 208 | 9  | 50.5626283367556 | 23.7523574695946 | 0 | 0 |
| 208 | 10 | 54.3244353182752 | 23.3671841052228 | 0 | 0 |
| 209 | 1  | 21.7166324435318 | 24.4075641778007 | 0 | 0 |
| 209 | 2  | 27.3292265571526 | 23.4840347224245 | 0 | 0 |
| 209 | 3  | 30.8336755646817 | 26.1226903092137 | 0 | 0 |
| 209 | 4  | 34.4613278576318 | 27.04621976459   | 0 | 0 |
| 209 | 5  | 39.0855578370979 | 29.4210097927003 | 0 | 0 |
| 209 | 6  | 42.1629021218344 | 28.761345896003  | 0 | 0 |
| 209 | 7  | 45.3305954825462 | 29.1571442340214 | 0 | 0 |
| 209 | 8  | 47.9151266255989 | 30.0806736893976 | 0 | 0 |
| 209 | 9  | 51.0390143737166 | 31.9277326001501 | 0 | 0 |
| 209 | 10 | 54.1601642710472 | 34.0386570695815 | 0 | 0 |
| 210 | 1  | 26.5982203969884 | 19.9365852279514 | 0 | 0 |
| 210 | 2  | 38.0917180013689 | 21.6996846018519 | 0 | 0 |
| 210 | 3  | 42.4969199178645 | 24.1408991195602 | 0 | 0 |
| 210 | 4  | 45.0896646132786 | 24.9546372921296 | 0 | 0 |
| 210 | 5  | 48.1149897330595 | 24.1408991195602 | 0 | 0 |
| 210 | 6  | 50.776180698152  | 22.2421767168981 | 0 | 0 |
| 210 | 7  | 53.8015058179329 | 26.3108675797454 | 0 | 1 |
| 210 | 8  | 57.160848733744  | 26.4464906085069 | 0 | 0 |
| 210 | 9  | 60.4243668720055 | 25.3615063784144 | 0 | 0 |
| 210 | 10 | 63.3593429158111 | 26.1752445509838 | 0 | 0 |
| 211 | 1  | 27.3538672142368 | 19.2621857835616 | 0 | 0 |
| 211 | 2  | 29.4182067077344 | 20.1857152389379 | 0 | 0 |
| 211 | 3  | 34.9185489390828 | 20.8453791356352 | 0 | 0 |
| 211 | 4  | 39.419575633128  | 21.7689085910114 | 0 | 0 |
| 211 | 5  | 42.1683778234086 | 24.8033625158191 | 0 | 0 |
| 211 | 6  | 44.7556468172485 | 25.067228074498  | 0 | 0 |
| 211 | 7  | 48               | 26.1226903092137 | 0 | 0 |
| 211 | 8  | 51.523613963039  | 27.04621976459   | 0 | 0 |
| 211 | 9  | 53.8562628336756 | 27.8378164406268 | 0 | 0 |
| 211 | 10 | 57.2867898699521 | 26.3865558678927 | 0 | 0 |
| 212 | 1  | 27.1321013004791 | 19.9182831583261 | 0 | 0 |
| 212 | 2  | 28.3394934976044 | 20.3744270474481 | 0 | 0 |
| 212 | 3  | 29.4948665297741 | 21.8949066778547 | 0 | 1 |

|     |    |                  |                  |   |   |
|-----|----|------------------|------------------|---|---|
| 212 | 4  | 32.0383299110199 | 21.8949066778547 | 0 | 0 |
| 212 | 5  | 33.0130047912389 | 22.5030985300173 | 0 | 0 |
| 212 | 6  | 34.1054072553046 | 23.4153863082612 | 0 | 0 |
| 212 | 7  | 35.5318275154004 | 22.3510505669766 | 0 | 0 |
| 212 | 8  | 36.0109514031485 | 23.1112903821799 | 0 | 0 |
| 212 | 9  | 36.9911019849418 | 22.655146493058  | 0 | 0 |
| 212 | 10 | 38.1026694045175 | 22.9592424191393 | 0 | 0 |
| 213 | 1  | 24.1314168377823 | 21.5225443193878 | 0 | 0 |
| 213 | 2  | 28.2026009582478 | 22.2399624633673 | 0 | 0 |
| 213 | 3  | 30.5023956194387 | 22.9573806073469 | 0 | 0 |
| 213 | 4  | 31.3237508555784 | 22.9573806073469 | 0 | 0 |
| 213 | 5  | 32.8678986995209 | 22.2399624633673 | 0 | 0 |
| 213 | 6  | 34.7953456536619 | 23.3878314937347 | 0 | 0 |
| 213 | 7  | 38.9404517453799 | 21.8095115769796 | 0 | 0 |
| 213 | 8  | 41.3689253935661 | 23.6747987513265 | 0 | 0 |
| 213 | 9  | 41.6563997262149 | 23.3878314937347 | 0 | 0 |
| 213 | 10 | 44.2108145106092 | 25.1096350392857 | 0 | 0 |
| 214 | 1  | 28.7529089664613 | 23.4930869157942 | 0 | 0 |
| 214 | 2  | 29.9986310746064 | 25.5291544484963 | 0 | 0 |
| 214 | 3  | 31.6440793976728 | 24.2761898129873 | 0 | 0 |
| 214 | 4  | 31.917864476386  | 25.0592927101804 | 0 | 0 |
| 214 | 5  | 33.3360711841205 | 27.2519808223212 | 0 | 0 |
| 214 | 6  | 33.7522245037645 | 27.5652219811985 | 0 | 0 |
| 214 | 7  | 36.1670088980151 | 27.4086014017599 | 0 | 0 |
| 214 | 8  | 36.5831622176591 | 27.4086014017599 | 0 | 0 |
| 214 | 9  | 41.2484599589322 | 28.9748071961461 | 0 | 0 |
| 214 | 10 | 47.170431211499  | 29.2880483550234 | 0 | 0 |
| 215 | 1  | 27.5263518138261 | 22.7415976243226 | 0 | 0 |
| 215 | 2  | 28.9993155373032 | 23.4799611835539 | 0 | 0 |
| 215 | 3  | 32.0219028062971 | 23.1846157598614 | 0 | 0 |
| 215 | 4  | 34.0752908966461 | 24.3659974546314 | 0 | 0 |
| 215 | 5  | 34.9924709103354 | 24.0706520309389 | 0 | 0 |
| 215 | 6  | 40.0766598220397 | 26.2857427086326 | 0 | 0 |
| 215 | 7  | 43.1676933607118 | 26.5810881323251 | 0 | 0 |
| 215 | 8  | 45.8288843258042 | 24.8090155901701 | 0 | 0 |
| 215 | 9  | 49.9137577002053 | 28.0578152507877 | 0 | 0 |
| 215 | 10 | 54.0424366872005 | 25.6950518612476 | 0 | 0 |
| 216 | 1  | 30.6666666666667 | 21.742858714814  | 0 | 0 |
| 216 | 2  | 33.4072553045859 | 24.0235781604239 | 0 | 0 |
| 216 | 3  | 33.8069815195072 | 23.5674342713019 | 0 | 0 |
| 216 | 4  | 35.5044490075291 | 25.0879139017085 | 0 | 0 |
| 216 | 5  | 42.0862422997947 | 25.0879139017085 | 0 | 0 |
| 216 | 6  | 48.3367556468172 | 25.5440577908304 | 0 | 0 |
| 216 | 7  | 52.4188911704312 | 25.6961057538711 | 0 | 0 |
| 216 | 8  | 55.6221765913758 | 26.7604414951557 | 0 | 0 |
| 216 | 9  | 59.7563312799452 | 26.1522496429931 | 0 | 0 |
| 216 | 10 | 83.6550308008214 | 26.9124894581964 | 0 | 0 |
| 217 | 1  | 27.0828199863107 | 22.5030985300173 | 0 | 0 |
| 217 | 2  | 32.0328542094456 | 24.6317700125865 | 0 | 0 |
| 217 | 3  | 32.082135523614  | 24.6317700125865 | 0 | 0 |
| 217 | 4  | 38.3353867214237 | 24.6317700125865 | 0 | 0 |
| 217 | 5  | 41.9164955509925 | 26.4563455690744 | 0 | 0 |
| 217 | 6  | 44.6680355920602 | 26.6083935321151 | 0 | 1 |
| 217 | 7  | 47.9151266255989 | 25.8481537169118 | 0 | 1 |



|     |    |                  |                  |   |   |
|-----|----|------------------|------------------|---|---|
| 217 | 8  | 54.135523613963  | 26.4563455690744 | 0 | 0 |
| 217 | 9  | 55.9753593429158 | 26.6083935321151 | 0 | 0 |
| 217 | 10 | 56.9993155373032 | 26.7604414951557 | 0 | 1 |
| 218 | 1  | 28.37234770705   | 25.0902603208912 | 0 | 0 |
| 218 | 2  | 34.2915811088296 | 26.0396215222222 | 0 | 0 |
| 218 | 3  | 38.7104722792608 | 24.6833912346065 | 0 | 0 |
| 218 | 4  | 41.8179329226557 | 24.5477682058449 | 0 | 0 |
| 218 | 5  | 44.539356605065  | 24.1408991195602 | 0 | 0 |
| 218 | 6  | 48.539356605065  | 23.7340300332755 | 0 | 0 |
| 218 | 7  | 51.1430527036277 | 23.0559148894676 | 0 | 0 |
| 218 | 8  | 53.7303216974675 | 23.0559148894676 | 0 | 1 |
| 218 | 9  | 56.1095140314853 | 22.920291860706  | 0 | 0 |
| 218 | 10 | 57.2813141683778 | 23.7340300332755 | 0 | 0 |
| 219 | 1  | 48.4955509924709 | 23.3271609469907 | 1 | 0 |
| 219 | 2  | 49.6974674880219 | 22.7846688319444 | 1 | 0 |
| 219 | 3  | 53.4346338124572 | 23.3271609469907 | 1 | 0 |
| 219 | 4  | 56.062970568104  | 23.5984070045139 | 1 | 0 |
| 219 | 5  | 60.5941136208077 | 23.4627839757523 | 1 | 0 |
| 219 | 6  | 61.8945927446954 | 23.7340300332755 | 1 | 0 |
| 219 | 7  | 64.5311430527036 | 23.4627839757523 | 1 | 0 |
| 219 | 8  | 65.2621492128679 | 22.3777997456597 | 1 | 0 |
| 219 | 9  | 65.5523613963039 | 22.3777997456597 | 1 | 0 |
| 219 | 10 | 65.9192334017796 | 21.970930659375  | 1 | 0 |
| 220 | 1  | 31.0006844626968 | 25.1043610138626 | 0 | 0 |
| 220 | 2  | 32.3394934976044 | 24.3659974546314 | 0 | 0 |
| 220 | 3  | 34.4804928131417 | 24.5136701664776 | 0 | 0 |
| 220 | 4  | 35.5044490075291 | 25.3997064375551 | 0 | 0 |
| 220 | 5  | 37.8425735797399 | 27.1717789797101 | 0 | 0 |
| 220 | 6  | 38.1601642710472 | 26.8764335560176 | 0 | 0 |
| 220 | 7  | 39.709787816564  | 27.3194516915564 | 0 | 0 |
| 220 | 8  | 40.8377823408624 | 27.3194516915564 | 0 | 0 |
| 220 | 9  | 44.788501026694  | 27.3194516915564 | 0 | 0 |
| 220 | 10 | 45.1663244353183 | 26.5810881323251 | 0 | 0 |
| 221 | 1  | 29.6646132785763 | 23.0369430480151 | 0 | 0 |
| 221 | 2  | 30.6584531143053 | 22.7415976243226 | 0 | 0 |
| 221 | 3  | 30.7898699520876 | 22.7415976243226 | 0 | 0 |
| 221 | 4  | 33.1498973305955 | 22.8892703361689 | 0 | 0 |
| 221 | 5  | 35.6659822039699 | 24.2183247427851 | 0 | 0 |
| 221 | 6  | 36.684462696783  | 24.0706520309389 | 0 | 0 |
| 221 | 7  | 41.0841889117043 | 24.8090155901701 | 0 | 0 |
| 221 | 8  | 43.6194387405886 | 25.9903972849401 | 0 | 0 |
| 221 | 9  | 45.5879534565366 | 23.7753066072464 | 0 | 0 |
| 221 | 10 | 47.5865845311431 | 23.1846157598614 | 0 | 0 |
| 223 | 1  | 41.3661875427789 | 22.0964788345714 | 0 | 0 |
| 223 | 2  | 43.6331279945243 | 22.5269297209592 | 0 | 0 |
| 223 | 3  | 47.8028747433265 | 21.5225443193878 | 0 | 0 |
| 223 | 4  | 51.0088980150582 | 22.2399624633673 | 0 | 0 |
| 223 | 5  | 54.6338124572211 | 21.5225443193878 | 0 | 0 |
| 223 | 6  | 56.9308692676249 | 23.2443478649388 | 0 | 0 |
| 223 | 7  | 59.5509924709103 | 22.9573806073469 | 0 | 0 |
| 223 | 8  | 61.719370294319  | 23.8182823801224 | 0 | 0 |
| 223 | 9  | 63.7180013689254 | 24.2487332665102 | 0 | 1 |
| 223 | 10 | 66.1519507186858 | 23.8182823801224 | 0 | 1 |
| 224 | 1  | 26.9158110882957 | 22.5269297209592 | 0 | 0 |

|     |    |                  |                  |   |   |
|-----|----|------------------|------------------|---|---|
| 224 | 2  | 30.0835044490075 | 23.9617660089184 | 0 | 0 |
| 224 | 3  | 35.9151266255989 | 26.400987698449  | 0 | 0 |
| 224 | 4  | 40.9144421629021 | 26.9749222136327 | 0 | 1 |
| 224 | 5  | 43.7481177275838 | 26.5444713272449 | 0 | 0 |
| 224 | 6  | 45.3607118412047 | 24.679184152898  | 0 | 0 |
| 224 | 7  | 47.501711156742  | 27.2618894712245 | 0 | 1 |
| 224 | 8  | 50.4202600958248 | 27.2618894712245 | 0 | 1 |
| 224 | 9  | 53.6180698151951 | 26.6879549560408 | 0 | 1 |
| 224 | 10 | 57.8398357289528 | 25.3966022968776 | 0 | 1 |
| 225 | 1  | 30.6666666666667 | 26.6388272545328 | 0 | 0 |
| 225 | 2  | 31.1540041067762 | 26.9177678540567 | 0 | 0 |
| 225 | 3  | 32.6488706365503 | 27.1967084535806 | 0 | 0 |
| 225 | 4  | 34.0889801505818 | 26.3598866550089 | 0 | 0 |
| 225 | 5  | 34.5817932922656 | 26.9177678540567 | 0 | 0 |
| 225 | 6  | 36.5147159479808 | 27.0572381538187 | 0 | 0 |
| 225 | 7  | 36.9993155373032 | 27.1967084535806 | 0 | 0 |
| 225 | 8  | 38.4531143052704 | 26.220416355247  | 0 | 0 |
| 225 | 9  | 40.4134154688569 | 26.220416355247  | 0 | 0 |
| 225 | 10 | 42.3600273785079 | 26.4993569547709 | 0 | 0 |
| 227 | 1  | 26.5270362765229 | 19.7608370427515 | 0 | 0 |
| 227 | 2  | 27.4989733059548 | 21.3786833503452 | 0 | 0 |
| 227 | 3  | 29.5112936344969 | 21.3786833503452 | 0 | 0 |
| 227 | 4  | 30.6255989048597 | 22.187606504142  | 0 | 0 |
| 227 | 5  | 32.0246406570842 | 23.1120901084813 | 0 | 0 |
| 227 | 6  | 33.0841889117043 | 24.1521341633629 | 0 | 0 |
| 227 | 7  | 33.9767282683094 | 24.9610573171598 | 0 | 0 |
| 227 | 8  | 35.0335386721424 | 26.0011013720414 | 0 | 0 |
| 227 | 9  | 35.3347022587269 | 26.0011013720414 | 0 | 0 |
| 227 | 10 | 35.9890485968515 | 25.307738668787  | 0 | 0 |
| 230 | 1  | 25.7494866529774 | 21.4284385443287 | 0 | 0 |
| 230 | 2  | 26.7734428473648 | 21.1571924868056 | 0 | 0 |
| 230 | 3  | 27.7289527720739 | 21.6996846018519 | 0 | 0 |
| 230 | 4  | 29.719370294319  | 23.3271609469907 | 0 | 0 |
| 230 | 5  | 30.2532511978097 | 22.7846688319444 | 0 | 0 |
| 230 | 6  | 33.1964407939767 | 23.5984070045139 | 0 | 0 |
| 230 | 7  | 33.7275838466804 | 24.2765221483218 | 0 | 0 |
| 230 | 8  | 35.7481177275838 | 24.1408991195602 | 0 | 0 |
| 230 | 9  | 37.8343600273785 | 24.9546372921296 | 0 | 0 |
| 230 | 10 | 39.8329911019849 | 24.8190142633681 | 0 | 0 |
| 232 | 1  | 27.3292265571526 | 22.3152479619123 | 0 | 0 |
| 232 | 2  | 27.813826146475  | 23.5704806597699 | 0 | 0 |
| 232 | 3  | 29.2484599589322 | 23.7099509595318 | 0 | 0 |
| 232 | 4  | 31.1622176591376 | 22.3152479619123 | 0 | 0 |
| 232 | 5  | 34.0780287474333 | 22.1757776621504 | 0 | 0 |
| 232 | 6  | 34.5681040383299 | 21.6178964631026 | 0 | 0 |
| 232 | 7  | 36.580424366872  | 21.1994855638167 | 0 | 0 |
| 232 | 8  | 38.7268993839836 | 21.8968370626265 | 0 | 0 |
| 232 | 9  | 40.662559890486  | 22.3152479619123 | 0 | 0 |
| 232 | 10 | 42.6173853524983 | 23.4310103600079 | 0 | 0 |
| 233 | 1  | 25.4976043805613 | 24.0091397125091 | 0 | 0 |
| 233 | 2  | 26.4175222450376 | 26.9621355060263 | 0 | 0 |
| 233 | 3  | 27.0636550308008 | 27.9892644776844 | 0 | 1 |
| 233 | 4  | 29.533196440794  | 27.6040911133126 | 0 | 0 |
| 233 | 5  | 30.0013689253936 | 27.9892644776844 | 0 | 0 |

|     |    |                  |                  |   |   |
|-----|----|------------------|------------------|---|---|
| 233 | 6  | 31.6112251882272 | 27.7324822347699 | 0 | 0 |
| 233 | 7  | 33.2375085557837 | 27.0905266274836 | 0 | 0 |
| 233 | 8  | 33.7330595482546 | 26.7053532631118 | 0 | 0 |
| 233 | 9  | 35.7481177275838 | 26.9621355060263 | 0 | 0 |
| 233 | 10 | 37.7385352498289 | 27.7324822347699 | 0 | 0 |
| 234 | 1  | 26.4175222450376 | 24.0307054086914 | 0 | 0 |
| 234 | 2  | 27.0198494182067 | 24.0307054086914 | 0 | 0 |
| 234 | 3  | 30.154688569473  | 24.3740012002441 | 0 | 0 |
| 234 | 4  | 34.1875427789185 | 23.5157617213623 | 0 | 0 |
| 234 | 5  | 38.4585900068446 | 23.6874096171387 | 0 | 0 |
| 234 | 6  | 41.8918548939083 | 23.859057512915  | 0 | 0 |
| 234 | 7  | 43.8850102669405 | 24.5456490960205 | 0 | 0 |
| 234 | 8  | 44.7145790554415 | 24.7172969917969 | 0 | 0 |
| 234 | 9  | 45.9028062970568 | 23.6874096171387 | 0 | 0 |
| 234 | 10 | 47.8986995208761 | 24.3740012002441 | 0 | 0 |
| 235 | 1  | 27.7043121149897 | 22.3152479619123 | 0 | 0 |
| 235 | 2  | 30.7488021902806 | 21.3389558635787 | 0 | 0 |
| 235 | 3  | 33.2813141683778 | 22.3152479619123 | 0 | 0 |
| 235 | 4  | 33.8370978781656 | 22.0363073623884 | 0 | 0 |
| 235 | 5  | 36.249144421629  | 23.0125994607221 | 0 | 0 |
| 235 | 6  | 36.788501026694  | 22.5941885614362 | 0 | 0 |
| 235 | 7  | 40.1834360027378 | 23.8494212592938 | 0 | 0 |
| 235 | 8  | 40.3449691991786 | 23.7099509595318 | 0 | 0 |
| 235 | 9  | 40.9171800136893 | 23.8494212592938 | 0 | 0 |
| 235 | 10 | 41.9137577002053 | 24.4073024583416 | 0 | 0 |
| 237 | 1  | 32.829568788501  | 28.8891129777249 | 0 | 0 |
| 237 | 2  | 38.9158110882957 | 27.6727292733997 | 0 | 0 |
| 237 | 3  | 41.1663244353183 | 28.7370650146843 | 0 | 0 |
| 237 | 4  | 45.4182067077344 | 26.4563455690744 | 0 | 0 |
| 237 | 5  | 48.7474332648871 | 27.3686333473183 | 0 | 0 |
| 237 | 6  | 51.6632443531828 | 28.8891129777249 | 0 | 0 |
| 237 | 7  | 54.2888432580424 | 29.0411609407656 | 0 | 0 |
| 237 | 8  | 57.1937029431896 | 28.5850170516436 | 0 | 0 |
| 237 | 9  | 60.1834360027378 | 28.2809211255623 | 0 | 1 |
| 237 | 10 | 65.4811772758385 | 28.7370650146843 | 0 | 1 |
| 238 | 1  | 32.8323066392882 | 25.5473791494014 | 0 | 0 |
| 238 | 2  | 40.662559890486  | 25.2520337257089 | 0 | 0 |
| 238 | 3  | 44.8323066392882 | 24.0706520309389 | 0 | 0 |
| 238 | 4  | 47.4140999315537 | 26.5810881323251 | 0 | 0 |
| 238 | 5  | 50.1656399726215 | 25.9903972849401 | 0 | 0 |
| 238 | 6  | 53.1663244353183 | 25.8427245730939 | 0 | 0 |
| 238 | 7  | 56.6488706365503 | 25.8427245730939 | 0 | 0 |
| 238 | 8  | 59.2826830937714 | 24.0706520309389 | 0 | 0 |
| 238 | 9  | 60.974674880219  | 24.2183247427851 | 0 | 0 |
| 238 | 10 | 60.9774127310062 | 24.2183247427851 | 0 | 0 |
| 239 | 1  | 25.0020533880903 | 22.8536196193937 | 0 | 0 |
| 239 | 2  | 26.8555783709788 | 21.1845350404492 | 0 | 0 |
| 239 | 3  | 30.4147843942505 | 23.7523574695946 | 0 | 0 |
| 239 | 4  | 31.3319644079398 | 24.3943130768809 | 0 | 0 |
| 239 | 5  | 32.290212183436  | 25.9350065343681 | 0 | 0 |
| 239 | 6  | 32.4134154688569 | 25.9350065343681 | 0 | 0 |
| 239 | 7  | 33.0184804928131 | 25.5498331699963 | 0 | 0 |
| 239 | 8  | 33.4154688569473 | 24.3943130768809 | 0 | 0 |
| 239 | 9  | 37.7494866529774 | 28.246046720599  | 0 | 1 |

|     |    |                  |                  |   |   |
|-----|----|------------------|------------------|---|---|
| 239 | 10 | 40.1642710472279 | 30.0435224210007 | 0 | 0 |
| 240 | 1  | 27.4989733059548 | 24.2183247427851 | 0 | 0 |
| 240 | 2  | 28.9993155373032 | 25.6950518612476 | 0 | 0 |
| 240 | 3  | 30.9979466119097 | 27.1717789797101 | 0 | 0 |
| 240 | 4  | 33.056810403833  | 26.5810881323251 | 0 | 0 |
| 240 | 5  | 35.2470910335387 | 27.4671244034026 | 0 | 0 |
| 240 | 6  | 37.2457221081451 | 28.3531606744802 | 0 | 0 |
| 240 | 7  | 39.6659822039699 | 28.2054879626339 | 0 | 0 |
| 240 | 8  | 41.6646132785763 | 26.7287608441714 | 0 | 0 |
| 240 | 9  | 43.6714579055441 | 29.2391969455577 | 0 | 0 |
| 240 | 10 | 45.6646132785763 | 29.0915242337114 | 0 | 0 |
| 241 | 1  | 39.6824093086927 | 21.092093433     | 0 | 0 |
| 241 | 2  | 44.9144421629021 | 23.9617660089184 | 0 | 0 |
| 241 | 3  | 46.3436002737851 | 23.2443478649388 | 0 | 0 |
| 241 | 4  | 47.1978097193703 | 23.3878314937347 | 0 | 0 |
| 241 | 5  | 48.6707734428474 | 22.6704133497551 | 0 | 0 |
| 241 | 6  | 50.4202600958248 | 23.6747987513265 | 0 | 0 |
| 241 | 7  | 50.6283367556468 | 23.6747987513265 | 0 | 0 |
| 241 | 8  | 51.2662559890486 | 23.5313151225306 | 0 | 0 |
| 241 | 9  | 53.3552361396304 | 23.2443478649388 | 0 | 0 |
| 241 | 10 | 53.3908281998631 | 22.6704133497551 | 0 | 0 |
| 242 | 1  | 26.1218343600274 | 22.8731291609601 | 0 | 0 |
| 242 | 2  | 31.8329911019849 | 24.2678321585796 | 0 | 0 |
| 242 | 3  | 32.3860369609856 | 24.8257133576275 | 0 | 0 |
| 242 | 4  | 38.0013689253936 | 28.7308817509621 | 0 | 0 |
| 242 | 5  | 42.2532511978097 | 26.4993569547709 | 0 | 0 |
| 242 | 6  | 44.6680355920602 | 28.4519411514382 | 0 | 0 |
| 242 | 7  | 47.5044490075291 | 28.8703520507241 | 0 | 0 |
| 242 | 8  | 50.3381245722108 | 29.009822350486  | 0 | 0 |
| 242 | 9  | 53.3524982888433 | 30.9624065471533 | 0 | 0 |
| 242 | 10 | 53.4154688569473 | 31.2413471466772 | 0 | 0 |
| 243 | 1  | 33.5249828884326 | 25.8244180385675 | 0 | 0 |
| 243 | 2  | 36.9171800136893 | 25.5016128130854 | 0 | 0 |
| 243 | 3  | 37.0540725530459 | 25.5016128130854 | 0 | 0 |
| 243 | 4  | 39.9342915811088 | 27.438444165978  | 0 | 0 |
| 243 | 5  | 40.5941136208077 | 25.5016128130854 | 0 | 0 |
| 243 | 6  | 42.4147843942505 | 25.8244180385675 | 0 | 0 |
| 243 | 7  | 43.7125256673511 | 25.3402102003444 | 0 | 0 |
| 243 | 8  | 46.7488021902806 | 25.5016128130854 | 0 | 0 |
| 243 | 9  | 49.2703627652293 | 25.5016128130854 | 0 | 0 |
| 243 | 10 | 51.1676933607118 | 27.438444165978  | 0 | 0 |
| 244 | 1  | 37.5085557837098 | 25.685775027935  | 0 | 0 |
| 244 | 2  | 39.6632443531828 | 25.8423956073736 | 0 | 0 |
| 244 | 3  | 41.5687885010267 | 25.9990161868122 | 0 | 0 |
| 244 | 4  | 43.5674195756331 | 25.9990161868122 | 0 | 0 |
| 244 | 5  | 45.6646132785763 | 24.9026721307418 | 0 | 0 |
| 244 | 6  | 47.6303901437372 | 25.685775027935  | 0 | 0 |
| 244 | 7  | 49.6646132785763 | 25.9990161868122 | 0 | 0 |
| 244 | 8  | 51.7125256673511 | 27.7218425606371 | 0 | 0 |
| 244 | 9  | 53.6646132785763 | 27.7218425606371 | 0 | 0 |
| 244 | 10 | 54.2450376454483 | 27.5652219811985 | 0 | 0 |
| 245 | 1  | 28.7529089664613 | 23.3271609469907 | 0 | 0 |
| 245 | 2  | 30.0835044490075 | 24.4121451770833 | 0 | 0 |
| 245 | 3  | 33.1498973305955 | 23.7340300332755 | 0 | 0 |

|     |    |                  |                  |   |   |
|-----|----|------------------|------------------|---|---|
| 245 | 4  | 34.4175222450376 | 23.7340300332755 | 0 | 0 |
| 245 | 5  | 35.3538672142368 | 23.7340300332755 | 0 | 0 |
| 245 | 6  | 38.3326488706366 | 24.1408991195602 | 0 | 0 |
| 245 | 7  | 41.7522245037645 | 24.6833912346065 | 0 | 0 |
| 245 | 8  | 43.9671457905544 | 24.4121451770833 | 0 | 0 |
| 245 | 9  | 45.9137577002053 | 25.4971294071759 | 0 | 0 |
| 245 | 10 | 47.9425051334702 | 24.4121451770833 | 0 | 0 |
| 246 | 1  | 38.1245722108145 | 26.5810881323251 | 0 | 0 |
| 246 | 2  | 39.5811088295688 | 26.5810881323251 | 0 | 0 |
| 246 | 3  | 42.2340862422998 | 27.7624698270951 | 0 | 0 |
| 246 | 4  | 43.5455167693361 | 27.7624698270951 | 0 | 0 |
| 246 | 5  | 44.3340177960301 | 26.8764335560176 | 0 | 0 |
| 246 | 6  | 46.4585900068446 | 27.3194516915564 | 0 | 0 |
| 246 | 7  | 46.4887063655031 | 27.3194516915564 | 0 | 0 |
| 246 | 8  | 48.580424366872  | 26.8764335560176 | 0 | 0 |
| 246 | 9  | 50.8473648186174 | 27.1717789797101 | 0 | 0 |
| 246 | 10 | 52.9993155373032 | 26.5810881323251 | 0 | 0 |
| 248 | 1  | 32.4380561259411 | 26.3122573456895 | 0 | 0 |
| 248 | 2  | 35.8329911019849 | 26.4688779251281 | 0 | 0 |
| 248 | 3  | 38.3655030800821 | 27.0953602428826 | 0 | 0 |
| 248 | 4  | 38.9815195071869 | 27.0953602428826 | 0 | 0 |
| 248 | 5  | 40.8350444900753 | 28.0350837195144 | 0 | 0 |
| 248 | 6  | 42.1163586584531 | 27.4086014017599 | 0 | 0 |
| 248 | 7  | 45.1690622861054 | 27.2519808223212 | 0 | 0 |
| 248 | 8  | 49.6728268309377 | 27.7218425606371 | 0 | 0 |
| 248 | 9  | 51.6550308008214 | 26.1556367662508 | 0 | 0 |
| 248 | 10 | 53.6728268309377 | 26.938739663444  | 0 | 0 |
| 249 | 1  | 25.6673511293635 | 24.8560023621212 | 0 | 0 |
| 249 | 2  | 37.0841889117043 | 24.5331971366391 | 0 | 0 |
| 249 | 3  | 40.9993155373032 | 25.0174049748623 | 0 | 0 |
| 249 | 4  | 44.0848733744011 | 25.6630154258264 | 0 | 0 |
| 249 | 5  | 47.0855578370979 | 24.8560023621212 | 0 | 0 |
| 249 | 6  | 50.1054072553046 | 23.8875866856749 | 0 | 0 |
| 249 | 7  | 53.1143052703628 | 23.7261840729339 | 0 | 0 |
| 249 | 8  | 55.6988364134155 | 24.5331971366391 | 0 | 0 |
| 249 | 9  | 60.8870636550308 | 23.7261840729339 | 0 | 0 |
| 249 | 10 | 63.605749486653  | 24.3717945238981 | 0 | 0 |
| 250 | 1  | 31.6605065023956 | 31.0112694877127 | 0 | 0 |
| 250 | 2  | 33.1663244353183 | 30.1252332166352 | 0 | 0 |
| 250 | 3  | 35.1211498973306 | 30.1252332166352 | 0 | 0 |
| 250 | 4  | 37.0814510609172 | 29.6822150810964 | 0 | 0 |
| 250 | 5  | 39.0390143737166 | 30.7159240640202 | 0 | 0 |
| 250 | 6  | 40.9856262833676 | 28.3531606744802 | 0 | 0 |
| 250 | 7  | 42.9979466119097 | 29.6822150810964 | 0 | 0 |
| 250 | 8  | 44.9719370294319 | 28.9438515218652 | 0 | 0 |
| 250 | 9  | 46.9979466119097 | 30.7159240640202 | 0 | 0 |
| 250 | 10 | 49.0595482546201 | 29.9775605047889 | 0 | 0 |
| 251 | 1  | 26.7186858316222 | 22.2401222802851 | 0 | 0 |
| 251 | 2  | 29.0814510609172 | 22.5533634391624 | 0 | 0 |
| 251 | 3  | 31.006160164271  | 24.2761898129873 | 0 | 0 |
| 251 | 4  | 33.2511978097194 | 23.6497074952328 | 0 | 0 |
| 251 | 5  | 35.6796714579055 | 24.1195692335487 | 0 | 0 |
| 251 | 6  | 37.7138945927447 | 24.5894309718646 | 0 | 0 |
| 251 | 7  | 40               | 25.3725338690577 | 0 | 0 |

|     |    |                  |                  |   |   |
|-----|----|------------------|------------------|---|---|
| 251 | 8  | 41.9329226557153 | 24.2761898129873 | 0 | 0 |
| 251 | 9  | 43.9151266255989 | 24.9026721307418 | 0 | 0 |
| 251 | 10 | 45.4346338124572 | 25.3725338690577 | 0 | 0 |
| 254 | 1  | 35.0855578370979 | 34.1134450001183 | 0 | 1 |
| 254 | 2  | 40.580424366872  | 39.1056564635503 | 0 | 1 |
| 254 | 3  | 40.7474332648871 | 35.9439225367101 | 0 | 0 |
| 254 | 4  | 41.4537987679671 | 35.9439225367101 | 0 | 1 |
| 254 | 5  | 44.3340177960301 | 34.2798520488994 | 0 | 1 |
| 254 | 6  | 47.0855578370979 | 35.9439225367101 | 0 | 1 |
| 254 | 7  | 47.8329911019849 | 32.2829674635266 | 0 | 1 |
| 254 | 8  | 48.5037645448323 | 34.1134450001183 | 0 | 1 |
| 254 | 9  | 49.8343600273785 | 33.6142238537751 | 0 | 1 |
| 254 | 10 | 50.5817932922656 | 33.9470379513373 | 0 | 1 |
| 255 | 1  | 28.7802874743326 | 19.8908135887057 | 0 | 0 |
| 255 | 2  | 29.7494866529774 | 20.3606753270216 | 0 | 0 |
| 255 | 3  | 30.4640657084189 | 20.3606753270216 | 0 | 0 |
| 255 | 4  | 31.6440793976728 | 20.0474341681444 | 0 | 0 |
| 255 | 5  | 33.2539356605065 | 20.0474341681444 | 0 | 0 |
| 255 | 6  | 37.1718001368925 | 19.5775724298285 | 0 | 0 |
| 255 | 7  | 37.7878165639973 | 20.5172959064602 | 0 | 0 |
| 255 | 8  | 39.0499657768652 | 21.1437782242147 | 0 | 0 |
| 255 | 9  | 40.0848733744011 | 21.3003988036534 | 0 | 0 |
| 255 | 10 | 41.0485968514716 | 21.3003988036534 | 0 | 0 |
| 257 | 1  | 52.331279945243  | 25.9414757557231 | 0 | 0 |
| 257 | 2  | 54.7022587268994 | 24.4073024583416 | 0 | 0 |
| 257 | 3  | 54.715947980835  | 23.9888915590557 | 0 | 0 |
| 257 | 4  | 55.2908966461328 | 24.8257133576275 | 0 | 0 |
| 257 | 5  | 57.7440109514031 | 25.8020054559611 | 0 | 0 |
| 257 | 6  | 58.299794661191  | 26.7782975542948 | 0 | 0 |
| 257 | 7  | 59.7070499657769 | 26.9177678540567 | 0 | 0 |
| 257 | 8  | 61.3305954825462 | 26.4993569547709 | 0 | 0 |
| 257 | 9  | 64.4407939767283 | 26.080946055485  | 0 | 0 |
| 257 | 10 | 64.9883641341547 | 26.4993569547709 | 0 | 0 |
| 258 | 1  | 34.2532511978097 | 28.191704298953  | 0 | 0 |
| 258 | 2  | 36.041067761807  | 29.2880483550234 | 0 | 0 |
| 258 | 3  | 41.1690622861054 | 30.697633569971  | 0 | 0 |
| 258 | 4  | 44.5859000684463 | 30.0711512522165 | 0 | 0 |
| 258 | 5  | 45.7248459958932 | 30.5410129905324 | 0 | 1 |
| 258 | 6  | 49.6728268309377 | 32.2638393643573 | 0 | 1 |
| 258 | 7  | 53.5030800821355 | 30.5410129905324 | 0 | 0 |
| 258 | 8  | 63.3620807665982 | 33.673424579305  | 0 | 0 |
| 258 | 9  | 65.492128678987  | 35.8661126914458 | 0 | 1 |
| 258 | 10 | 67.917864476386  | 35.7094921120071 | 0 | 1 |
| 259 | 1  | 35.4962354551677 | 22.3152479619123 | 0 | 0 |
| 259 | 2  | 40.4134154688569 | 22.1757776621504 | 0 | 0 |
| 259 | 3  | 44.7474332648871 | 23.0125994607221 | 0 | 0 |
| 259 | 4  | 47.2881587953457 | 22.3152479619123 | 0 | 0 |
| 259 | 5  | 48.6652977412731 | 23.0125994607221 | 0 | 0 |
| 259 | 6  | 49.8891170431211 | 23.0125994607221 | 0 | 0 |
| 259 | 7  | 50.9130732375086 | 22.7336588611982 | 0 | 0 |
| 259 | 8  | 54.0835044490075 | 25.8020054559611 | 0 | 0 |
| 259 | 9  | 56.848733744011  | 23.0125994607221 | 0 | 1 |
| 259 | 10 | 59.6522929500342 | 25.1046539571514 | 0 | 0 |
| 260 | 1  | 28.3340177960301 | 21.7078886413989 | 1 | 0 |

|     |    |                  |                  |   |   |
|-----|----|------------------|------------------|---|---|
| 260 | 2  | 35.0006844626968 | 24.5136701664776 | 1 | 0 |
| 260 | 3  | 39.501711156742  | 23.9229793190926 | 1 | 0 |
| 260 | 4  | 42.0835044490075 | 24.0706520309389 | 1 | 0 |
| 260 | 5  | 45.5003422313484 | 24.3659974546314 | 1 | 0 |
| 260 | 6  | 47.8384668035592 | 23.3322884717076 | 1 | 1 |
| 260 | 7  | 50.9322381930185 | 25.3997064375551 | 1 | 0 |
| 260 | 8  | 54.0780287474333 | 25.3997064375551 | 1 | 0 |
| 260 | 9  | 57.2347707049966 | 24.8090155901701 | 1 | 0 |
| 260 | 10 | 59.8631074606434 | 23.6276338954001 | 1 | 0 |
| 261 | 1  | 40.7501711156742 | 24.3717945238981 | 1 | 0 |
| 261 | 2  | 44.3367556468172 | 24.210391911157  | 1 | 0 |
| 261 | 3  | 44.6652977412731 | 24.210391911157  | 1 | 0 |
| 261 | 4  | 51.170431211499  | 22.7577683964876 | 1 | 0 |
| 261 | 5  | 55.5893223819302 | 21.9507553327824 | 1 | 0 |
| 261 | 6  | 59.2525667351129 | 21.3051448818182 | 1 | 0 |
| 261 | 7  | 61.4455852156057 | 20.9823396563361 | 1 | 0 |
| 261 | 8  | 64.8788501026694 | 20.4981318181129 | 1 | 0 |
| 261 | 9  | 67.8110882956879 | 21.3051448818182 | 1 | 0 |
| 261 | 10 | 69.80424366872   | 20.1753265926309 | 1 | 0 |
| 263 | 1  | 39.170431211499  | 25.7268919711953 | 0 | 0 |
| 263 | 2  | 42.4996577686516 | 25.067228074498  | 0 | 0 |
| 263 | 3  | 42.5544147843943 | 25.8588247505348 | 0 | 0 |
| 263 | 4  | 45.5523613963039 | 27.7058836612873 | 0 | 0 |
| 263 | 5  | 46.0177960301164 | 25.067228074498  | 0 | 0 |
| 263 | 6  | 48.5831622176591 | 31.0042031447739 | 0 | 0 |
| 263 | 7  | 48.7611225188227 | 31.0042031447739 | 0 | 0 |
| 263 | 8  | 52.4161533196441 | 27.8378164406268 | 0 | 0 |
| 263 | 9  | 55.337440109514  | 25.331093633177  | 0 | 0 |
| 263 | 10 | 58.7488021902806 | 28.3655475579846 | 0 | 0 |
| 264 | 1  | 27.4277891854894 | 22.5269297209592 | 0 | 0 |
| 264 | 2  | 31.3347022587269 | 22.3834460921633 | 0 | 0 |
| 264 | 3  | 33.7494866529774 | 22.6704133497551 | 0 | 0 |
| 264 | 4  | 34.90212183436   | 23.3878314937347 | 0 | 0 |
| 264 | 5  | 35.1403148528405 | 23.9617660089184 | 0 | 0 |
| 264 | 6  | 36.3340177960301 | 24.535700524102  | 0 | 0 |
| 264 | 7  | 38.0835044490075 | 25.8270531832653 | 0 | 0 |
| 264 | 8  | 41.0020533880903 | 26.6879549560408 | 0 | 0 |
| 264 | 9  | 43.9151266255989 | 26.1140204408571 | 0 | 0 |
| 264 | 10 | 46.6639288158795 | 26.400987698449  | 0 | 0 |
| 265 | 1  | 44.9993155373032 | 26.938739663444  | 0 | 1 |
| 265 | 2  | 51.501711156742  | 29.1314277755848 | 0 | 1 |
| 265 | 3  | 55.501711156742  | 27.4086014017599 | 0 | 1 |
| 265 | 4  | 58.0013689253936 | 27.4086014017599 | 0 | 1 |
| 265 | 5  | 60.9993155373032 | 24.2761898129873 | 0 | 1 |
| 265 | 6  | 63.501711156742  | 24.2761898129873 | 0 | 1 |
| 265 | 7  | 66.3600273785079 | 25.5291544484963 | 0 | 1 |
| 265 | 8  | 69.1526351813826 | 24.1195692335487 | 0 | 1 |
| 265 | 9  | 72.0711841204654 | 25.3725338690577 | 0 | 0 |
| 265 | 10 | 74.3709787816564 | 23.1798457569169 | 0 | 0 |
| 267 | 1  | 33.7522245037645 | 25.3920098277898 | 0 | 0 |
| 267 | 2  | 34.1300479123888 | 24.3276740865052 | 0 | 0 |
| 267 | 3  | 35.7563312799452 | 23.8715301973832 | 0 | 0 |
| 267 | 4  | 37.07871321013   | 25.0879139017085 | 0 | 0 |
| 267 | 5  | 38.0807665982204 | 25.6961057538711 | 0 | 0 |

|     |    |                  |                  |   |   |
|-----|----|------------------|------------------|---|---|
| 267 | 6  | 44.1670088980151 | 28.8891129777249 | 0 | 1 |
| 267 | 7  | 47.9151266255989 | 29.1932089038062 | 0 | 1 |
| 267 | 8  | 51.5838466803559 | 29.3452568668469 | 0 | 1 |
| 267 | 9  | 52.788501026694  | 31.3218803863754 | 0 | 1 |
| 267 | 10 | 55.1649555099247 | 29.4973048298875 | 0 | 1 |
| 268 | 1  | 29.0075290896646 | 19.5137735162449 | 0 | 0 |
| 268 | 2  | 34.9158110882957 | 21.2355770617959 | 0 | 0 |
| 268 | 3  | 39.4140999315537 | 22.9573806073469 | 0 | 0 |
| 268 | 4  | 44.3367556468172 | 23.9617660089184 | 0 | 0 |
| 268 | 5  | 47.4140999315537 | 26.2575040696531 | 0 | 1 |
| 268 | 6  | 50.1656399726215 | 25.5400859256735 | 0 | 1 |
| 268 | 7  | 53.0841889117043 | 24.9661514104898 | 0 | 1 |
| 268 | 8  | 56.2354551676934 | 24.9661514104898 | 0 | 1 |
| 268 | 9  | 59.3210130047912 | 25.8270531832653 | 0 | 1 |
| 268 | 10 | 62.5270362765229 | 24.679184152898  | 0 | 1 |
| 269 | 1  | 29.9794661190965 | 20.8051261754082 | 0 | 0 |
| 269 | 2  | 32               | 19.9442244026327 | 0 | 0 |
| 269 | 3  | 33.9301848049281 | 21.5225443193878 | 0 | 0 |
| 269 | 4  | 36.2518822724162 | 22.0964788345714 | 0 | 0 |
| 269 | 5  | 38.3080082135524 | 22.3834460921633 | 0 | 0 |
| 269 | 6  | 40.1177275838467 | 21.5225443193878 | 0 | 0 |
| 269 | 7  | 42.0835044490075 | 21.3790606905918 | 0 | 0 |
| 269 | 8  | 44.0164271047228 | 22.813896978551  | 0 | 0 |
| 269 | 9  | 45.9986310746064 | 22.3834460921633 | 0 | 0 |
| 269 | 10 | 47.9014373716632 | 23.2443478649388 | 0 | 0 |
| 272 | 1  | 24.9144421629021 | 25.5473791494014 | 0 | 0 |
| 272 | 2  | 37.0841889117043 | 28.2054879626339 | 0 | 1 |
| 272 | 3  | 41.9219712525667 | 27.7624698270951 | 0 | 0 |
| 272 | 4  | 45.0431211498973 | 28.6485060981727 | 0 | 1 |
| 272 | 5  | 47.8384668035592 | 30.4205786403277 | 0 | 1 |
| 272 | 6  | 50.9596167008898 | 30.1252332166352 | 0 | 1 |
| 272 | 7  | 53.7713894592745 | 29.8298877929427 | 0 | 1 |
| 272 | 8  | 56.7720739219713 | 30.4205786403277 | 0 | 0 |
| 272 | 9  | 58.861054072553  | 29.2391969455577 | 0 | 0 |
| 272 | 10 | 58.9514031485284 | 29.2391969455577 | 0 | 1 |
| 273 | 1  | 22.4969199178645 | 25.685775027935  | 0 | 0 |
| 273 | 2  | 22.9979466119097 | 25.8423956073736 | 0 | 0 |
| 273 | 3  | 23.9863107460643 | 27.4086014017599 | 0 | 0 |
| 273 | 4  | 25.4757015742642 | 27.8784631400757 | 0 | 0 |
| 273 | 5  | 26.0123203285421 | 29.444668934462  | 0 | 0 |
| 273 | 6  | 27.0006844626968 | 29.1314277755848 | 0 | 0 |
| 273 | 7  | 27.9671457905544 | 29.6012895139006 | 0 | 0 |
| 273 | 8  | 29.0212183436003 | 26.4688779251281 | 0 | 0 |
| 273 | 9  | 30.0889801505818 | 27.4086014017599 | 0 | 0 |
| 273 | 10 | 31.1786447638604 | 28.191704298953  | 0 | 0 |
| 276 | 1  | 26.2505133470226 | 22.9573806073469 | 0 | 0 |
| 276 | 2  | 29.7467488021903 | 24.3922168953061 | 0 | 0 |
| 276 | 3  | 32.7227926078029 | 26.6879549560408 | 0 | 0 |
| 276 | 4  | 32.8952772073922 | 26.6879549560408 | 0 | 0 |
| 276 | 5  | 35.7481177275838 | 27.2618894712245 | 0 | 0 |
| 276 | 6  | 36.7310061601643 | 27.5488567288163 | 0 | 0 |
| 276 | 7  | 39.9151266255989 | 27.9793076152041 | 0 | 0 |
| 276 | 8  | 43.7481177275838 | 26.5444713272449 | 0 | 0 |
| 276 | 9  | 46.8309377138946 | 26.5444713272449 | 0 | 0 |



|     |    |                  |                  |   |   |
|-----|----|------------------|------------------|---|---|
| 276 | 10 | 56.6050650239562 | 33.7186527670408 | 0 | 1 |
| 277 | 1  | 36.082135523614  | 20.362663765245  | 0 | 0 |
| 277 | 2  | 39.3319644079398 | 21.3389558635787 | 0 | 0 |
| 277 | 3  | 42.5215605749487 | 22.8731291609601 | 0 | 0 |
| 277 | 4  | 45.5852156057495 | 22.4547182616743 | 0 | 0 |
| 277 | 5  | 46.6830937713895 | 22.4547182616743 | 0 | 0 |
| 277 | 6  | 49.9219712525667 | 24.2678321585796 | 0 | 1 |
| 277 | 7  | 51.0088980150582 | 24.5467727581036 | 0 | 0 |
| 277 | 8  | 51.9260780287474 | 24.6862430578655 | 0 | 0 |
| 277 | 9  | 53.5386721423682 | 24.9651836573894 | 0 | 0 |
| 277 | 10 | 54.4175222450376 | 24.5467727581036 | 0 | 0 |
| 278 | 1  | 37.4182067077344 | 26.9749222136327 | 0 | 0 |
| 278 | 2  | 40.5913757700205 | 26.6879549560408 | 0 | 0 |
| 278 | 3  | 41.2566735112936 | 27.1184058424286 | 0 | 1 |
| 278 | 4  | 43.4168377823409 | 26.9749222136327 | 0 | 0 |
| 278 | 5  | 43.5865845311431 | 26.9749222136327 | 0 | 0 |
| 278 | 6  | 44.5557837097878 | 28.122791244     | 0 | 1 |
| 278 | 7  | 45.2320328542094 | 26.8314385848367 | 0 | 1 |
| 278 | 8  | 45.6837782340862 | 27.2618894712245 | 0 | 1 |
| 278 | 9  | 46.2505133470226 | 27.5488567288163 | 0 | 1 |
| 278 | 10 | 49.2511978097194 | 26.1140204408571 | 0 | 1 |
| 279 | 1  | 24.5776865160849 | 22.3152479619123 | 1 | 0 |
| 279 | 2  | 36.5722108145106 | 25.8020054559611 | 1 | 1 |
| 279 | 3  | 36.5859000684463 | 25.8020054559611 | 1 | 1 |
| 279 | 4  | 43.8329911019849 | 25.1046539571514 | 1 | 1 |
| 279 | 5  | 48.4188911704312 | 27.8940599523904 | 1 | 1 |
| 279 | 6  | 50.0807665982204 | 24.6862430578655 | 1 | 1 |
| 279 | 7  | 53.7056810403833 | 28.0335302521524 | 1 | 1 |
| 279 | 8  | 54.4941820670773 | 26.6388272545328 | 1 | 1 |
| 279 | 9  | 57.9028062970568 | 26.220416355247  | 1 | 1 |
| 279 | 10 | 62.0944558521561 | 28.4519411514382 | 1 | 1 |
| 280 | 1  | 28.3997262149213 | 21.3790606905918 | 0 | 0 |
| 280 | 2  | 34.0862422997947 | 25.5400859256735 | 0 | 0 |
| 280 | 3  | 36.0602327173169 | 23.3878314937347 | 0 | 0 |
| 280 | 4  | 37.1553730321697 | 24.3922168953061 | 0 | 0 |
| 280 | 5  | 37.9739904175222 | 24.2487332665102 | 0 | 0 |
| 280 | 6  | 40.0848733744011 | 24.1052496377143 | 0 | 0 |
| 280 | 7  | 43.0527036276523 | 25.1096350392857 | 0 | 0 |
| 280 | 8  | 44.9226557152635 | 25.8270531832653 | 0 | 0 |
| 280 | 9  | 46.9048596851472 | 26.6879549560408 | 0 | 0 |
| 280 | 10 | 48.9226557152635 | 26.1140204408571 | 0 | 0 |
| 282 | 1  | 35.0006844626968 | 23.5157617213623 | 0 | 0 |
| 282 | 2  | 38.1437371663244 | 23.859057512915  | 0 | 0 |
| 282 | 3  | 41.9986310746064 | 21.6276348678223 | 0 | 0 |
| 282 | 4  | 42.1957563312799 | 20.9410432847168 | 0 | 0 |
| 282 | 5  | 42.694045174538  | 21.1126911804932 | 0 | 0 |
| 282 | 6  | 43.170431211499  | 21.2843390762695 | 0 | 0 |
| 282 | 7  | 43.64681724846   | 21.6276348678223 | 0 | 0 |
| 282 | 8  | 44.1232032854209 | 21.7992827635986 | 0 | 0 |
| 282 | 9  | 44.580424366872  | 21.6276348678223 | 0 | 0 |
| 282 | 10 | 47.1622176591376 | 19.5678601185059 | 0 | 0 |
| 283 | 1  | 26.5106091718001 | 21.8095115769796 | 0 | 0 |
| 283 | 2  | 28.498288843258  | 22.3834460921633 | 0 | 0 |
| 283 | 3  | 29.9712525667351 | 21.3790606905918 | 0 | 0 |

|     |    |                  |                  |   |   |
|-----|----|------------------|------------------|---|---|
| 283 | 4  | 30.4695414099932 | 22.6704133497551 | 0 | 0 |
| 283 | 5  | 31.9452429842574 | 22.0964788345714 | 0 | 0 |
| 283 | 6  | 32.4216290212183 | 23.5313151225306 | 0 | 0 |
| 283 | 7  | 34.4147843942505 | 23.1008642361429 | 0 | 0 |
| 283 | 8  | 36.3805612594114 | 23.3878314937347 | 0 | 0 |
| 283 | 9  | 38.3353867214237 | 23.2443478649388 | 0 | 0 |
| 283 | 10 | 40.3394934976044 | 24.679184152898  | 0 | 0 |
| 284 | 1  | 26.9185489390828 | 26.2857427086326 | 0 | 0 |
| 284 | 2  | 27.9260780287474 | 24.9566883020164 | 0 | 0 |
| 284 | 3  | 29.9575633127995 | 25.8427245730939 | 0 | 0 |
| 284 | 4  | 31.6714579055441 | 24.2183247427851 | 0 | 0 |
| 284 | 5  | 33.0212183436003 | 24.3659974546314 | 0 | 0 |
| 284 | 6  | 34.9349760438056 | 27.7624698270951 | 0 | 0 |
| 284 | 7  | 37.9192334017796 | 27.9101425389414 | 0 | 0 |
| 284 | 8  | 40.8350444900753 | 28.7961788100189 | 0 | 0 |
| 284 | 9  | 43.5865845311431 | 24.9566883020164 | 0 | 0 |
| 284 | 10 | 46.5051334702259 | 25.3997064375551 | 0 | 0 |
| 285 | 1  | 30.8336755646817 | 19.7881433873976 | 0 | 0 |
| 285 | 2  | 32.7200547570157 | 20.9695250821676 | 0 | 0 |
| 285 | 3  | 33.6399726214921 | 20.0834888110901 | 0 | 0 |
| 285 | 4  | 35.5811088295688 | 20.3788342347826 | 0 | 0 |
| 285 | 5  | 37.9247091033539 | 19.7881433873976 | 0 | 0 |
| 285 | 6  | 39.8247775496235 | 21.1171977940139 | 0 | 0 |
| 285 | 7  | 41.8343600273785 | 22.2985794887839 | 0 | 0 |
| 285 | 8  | 42.0752908966461 | 22.2985794887839 | 0 | 0 |
| 285 | 9  | 43.8932238193018 | 21.8555613532451 | 0 | 0 |
| 285 | 10 | 45.6673511293634 | 22.5939249124764 | 0 | 0 |
| 286 | 1  | 29.9137577002053 | 24.3943130768809 | 0 | 0 |
| 286 | 2  | 35.1649555099247 | 24.2659219554237 | 0 | 0 |
| 286 | 3  | 40.2518822724162 | 23.7523574695946 | 0 | 0 |
| 286 | 4  | 43.3292265571526 | 24.90787756271   | 0 | 0 |
| 286 | 5  | 46.0807665982204 | 24.90787756271   | 0 | 0 |
| 286 | 6  | 49.0814510609172 | 24.90787756271   | 0 | 0 |
| 286 | 7  | 52.0328542094456 | 25.0362686841673 | 0 | 0 |
| 286 | 8  | 55.1375770020534 | 24.0091397125091 | 0 | 0 |
| 286 | 9  | 57.6125941136208 | 25.1646598056245 | 0 | 0 |
| 286 | 10 | 60.2436687200548 | 25.0362686841673 | 0 | 0 |
| 287 | 1  | 25.3908281998631 | 22.9563036050666 | 0 | 0 |
| 287 | 2  | 30.3353867214237 | 22.1647069290298 | 0 | 0 |
| 287 | 3  | 32.2819986310746 | 22.4285724877088 | 0 | 0 |
| 287 | 4  | 34.8336755646817 | 22.4285724877088 | 0 | 0 |
| 287 | 5  | 38.2642026009582 | 23.0882363844061 | 0 | 0 |
| 287 | 6  | 41.5879534565366 | 24.6714297364796 | 0 | 0 |
| 287 | 7  | 43.8193018480493 | 23.4840347224245 | 0 | 0 |
| 287 | 8  | 45.0540725530459 | 22.9563036050666 | 0 | 0 |
| 287 | 9  | 46.7515400410678 | 23.7479002811034 | 0 | 0 |
| 287 | 10 | 49.5030800821355 | 23.0882363844061 | 0 | 0 |
| 288 | 1  | 31.501711156742  | 28.9748071961461 | 0 | 0 |
| 288 | 2  | 37.9164955509925 | 27.5652219811985 | 0 | 0 |
| 288 | 3  | 42.5872689938398 | 28.191704298953  | 0 | 0 |
| 288 | 4  | 45.5030800821355 | 30.0711512522165 | 0 | 0 |
| 288 | 5  | 49.9986310746064 | 28.3483248783916 | 0 | 0 |
| 288 | 6  | 52.4873374401095 | 26.6254985045667 | 0 | 0 |
| 288 | 7  | 55.4934976043806 | 26.6254985045667 | 0 | 0 |

|     |    |                  |                  |   |   |
|-----|----|------------------|------------------|---|---|
| 288 | 8  | 59.5619438740589 | 26.938739663444  | 0 | 0 |
| 288 | 9  | 62.3600273785079 | 26.7821190840053 | 0 | 0 |
| 288 | 10 | 65.6016427104723 | 25.5291544484963 | 0 | 0 |
| 289 | 1  | 34.9130732375086 | 22.5963657837466 | 0 | 0 |
| 289 | 2  | 40.1615331964408 | 22.1121579455234 | 0 | 0 |
| 289 | 3  | 41.388090349076  | 21.7893527200413 | 0 | 0 |
| 289 | 4  | 46.0752908966461 | 21.7893527200413 | 0 | 0 |
| 289 | 5  | 49.242984257358  | 22.5963657837466 | 0 | 0 |
| 289 | 6  | 52.3285420944559 | 21.7893527200413 | 0 | 0 |
| 289 | 7  | 58.5872689938398 | 20.9823396563361 | 0 | 0 |
| 289 | 8  | 64.3148528405202 | 19.6911187544077 | 0 | 0 |
| 289 | 9  | 64.3696098562628 | 19.6911187544077 | 0 | 0 |
| 289 | 10 | 64.5776865160849 | 20.1753265926309 | 0 | 0 |
| 290 | 1  | 28.5831622176591 | 23.291540060246  | 0 | 0 |
| 290 | 2  | 29.8069815195072 | 23.0125994607221 | 0 | 0 |
| 290 | 3  | 30.3134839151266 | 23.7099509595318 | 0 | 0 |
| 290 | 4  | 30.8199863107461 | 23.9888915590557 | 0 | 0 |
| 290 | 5  | 31.709787816564  | 22.7336588611982 | 0 | 0 |
| 290 | 6  | 31.7864476386037 | 22.7336588611982 | 0 | 0 |
| 290 | 7  | 31.8685831622177 | 22.7336588611982 | 0 | 0 |
| 290 | 8  | 33.0349075975359 | 23.4310103600079 | 0 | 0 |
| 290 | 9  | 33.9164955509925 | 22.3152479619123 | 0 | 0 |
| 290 | 10 | 35.2580424366872 | 22.3152479619123 | 0 | 0 |
| 291 | 1  | 26.0862422997947 | 20.0877080314286 | 0 | 0 |
| 291 | 2  | 33.2539356605065 | 21.2355770617959 | 0 | 0 |
| 291 | 3  | 38.6721423682409 | 22.2399624633673 | 0 | 0 |
| 291 | 4  | 42.2532511978097 | 21.8095115769796 | 0 | 0 |
| 291 | 5  | 44.9226557152635 | 21.9529952057755 | 0 | 0 |
| 291 | 6  | 53.0102669404517 | 21.5225443193878 | 0 | 0 |
| 291 | 7  | 54.5763175906913 | 21.2355770617959 | 0 | 0 |
| 291 | 8  | 55.8877481177276 | 20.6616425466122 | 0 | 0 |
| 291 | 9  | 56.208076659822  | 20.9486098042041 | 0 | 0 |
| 291 | 10 | 57.3032169746749 | 20.8051261754082 | 0 | 0 |
| 293 | 1  | 28.6023271731691 | 23.5596575677249 | 0 | 0 |
| 293 | 2  | 33.8316221765914 | 21.965395025548  | 0 | 0 |
| 293 | 3  | 39.750855578371  | 24.6224992625095 | 0 | 0 |
| 293 | 4  | 44.0848733744011 | 25.1539201099017 | 0 | 0 |
| 293 | 5  | 46.7515400410678 | 24.9767798274376 | 0 | 0 |
| 293 | 6  | 49.5879534565366 | 24.4453589800454 | 0 | 0 |
| 293 | 7  | 52.5037645448323 | 24.2682186975813 | 0 | 0 |
| 293 | 8  | 55.4743326488706 | 24.4453589800454 | 0 | 0 |
| 293 | 9  | 58.6173853524983 | 24.0910784151172 | 0 | 0 |
| 293 | 10 | 62.0068446269678 | 24.4453589800454 | 0 | 0 |
| 294 | 1  | 26.6639288158795 | 23.869653062037  | 0 | 0 |
| 294 | 2  | 29.1663244353183 | 25.9039984934606 | 0 | 0 |
| 294 | 3  | 35.2525667351129 | 27.395851809838  | 0 | 0 |
| 294 | 4  | 40.4955509924709 | 26.4464906085069 | 0 | 0 |
| 294 | 5  | 43.1676933607118 | 27.1246057523148 | 0 | 0 |
| 294 | 6  | 46.0013689253936 | 27.5314748385995 | 0 | 0 |
| 294 | 7  | 49.4264202600958 | 26.8533596947917 | 0 | 0 |
| 294 | 8  | 52.5311430527036 | 28.4808360399306 | 0 | 0 |
| 294 | 9  | 55.3538672142368 | 27.9383439248843 | 0 | 0 |
| 294 | 10 | 58.3134839151266 | 27.6670978673611 | 0 | 0 |
| 295 | 1  | 28.8350444900753 | 22.3834460921633 | 0 | 0 |

|     |    |                   |                  |   |   |
|-----|----|-------------------|------------------|---|---|
| 295 | 2  | 29.33333333333333 | 24.1052496377143 | 0 | 0 |
| 295 | 3  | 31.9260780287474  | 22.6704133497551 | 0 | 0 |
| 295 | 4  | 33.4976043805613  | 25.5400859256735 | 0 | 0 |
| 295 | 5  | 35.1512662559891  | 25.5400859256735 | 0 | 0 |
| 295 | 6  | 35.9698836413415  | 26.2575040696531 | 0 | 0 |
| 295 | 7  | 38.6666666666667  | 26.1140204408571 | 0 | 0 |
| 295 | 8  | 41.678302532512   | 25.8270531832653 | 0 | 0 |
| 295 | 9  | 43.4140999315537  | 25.9705368120612 | 0 | 0 |
| 295 | 10 | 45.3826146475017  | 26.2575040696531 | 0 | 0 |
| 298 | 1  | 26.4996577686516  | 25.5230648564372 | 0 | 0 |
| 298 | 2  | 26.7652292950034  | 25.2441242569133 | 0 | 0 |
| 298 | 3  | 28.7227926078029  | 26.080946055485  | 0 | 0 |
| 298 | 4  | 30.1601642710472  | 26.080946055485  | 0 | 0 |
| 298 | 5  | 31.6659822039699  | 26.4993569547709 | 0 | 0 |
| 298 | 6  | 32.3477070499658  | 26.6388272545328 | 0 | 0 |
| 298 | 7  | 33.7987679671458  | 26.6388272545328 | 0 | 0 |
| 298 | 8  | 34.8829568788501  | 26.080946055485  | 0 | 0 |
| 298 | 9  | 35.7809719370294  | 25.8020054559611 | 0 | 0 |
| 298 | 10 | 35.9260780287474  | 26.3598866550089 | 0 | 0 |
| 299 | 1  | 37.0184804928131  | 28.9836930167755 | 0 | 0 |
| 299 | 2  | 37.5879534565366  | 28.9836930167755 | 0 | 0 |
| 299 | 3  | 38.1054072553046  | 29.5576275319592 | 0 | 0 |
| 299 | 4  | 38.5434633812457  | 29.9880784183469 | 0 | 0 |
| 299 | 5  | 39.1047227926078  | 29.5576275319592 | 0 | 0 |
| 299 | 6  | 39.6002737850787  | 29.5576275319592 | 0 | 0 |
| 299 | 7  | 40.5913757700205  | 29.5576275319592 | 0 | 0 |
| 299 | 8  | 41.1718001368925  | 30.8489801911225 | 0 | 0 |
| 299 | 9  | 41.8425735797399  | 26.6879549560408 | 0 | 0 |
| 299 | 10 | 42.4202600958248  | 27.6923403576122 | 0 | 0 |
| 300 | 1  | 27.501711156742   | 24.679184152898  | 0 | 0 |
| 300 | 2  | 33.1690622861054  | 25.5400859256735 | 0 | 1 |
| 300 | 3  | 37.7494866529774  | 24.8226677816939 | 0 | 0 |
| 300 | 4  | 41.3360711841205  | 25.8270531832653 | 0 | 0 |
| 300 | 5  | 43.419575633128   | 25.8270531832653 | 0 | 1 |
| 300 | 6  | 46.5872689938398  | 26.8314385848367 | 0 | 1 |
| 300 | 7  | 47.3839835728953  | 27.6923403576122 | 0 | 0 |
| 300 | 8  | 50.0533880903491  | 28.4097585015918 | 0 | 1 |
| 300 | 9  | 51.2799452429843  | 29.2706602743673 | 0 | 1 |
| 300 | 10 | 53.4866529774127  | 29.7011111607551 | 0 | 1 |
| 301 | 1  | 20.5859000684463  | 19.2643312709512 | 0 | 0 |
| 301 | 2  | 22.5544147843943  | 20.3606753270216 | 0 | 0 |
| 301 | 3  | 25.0047912388775  | 20.3606753270216 | 0 | 0 |
| 301 | 4  | 25.9137577002053  | 20.3606753270216 | 0 | 0 |
| 301 | 5  | 27.9260780287474  | 19.8908135887057 | 0 | 0 |
| 301 | 6  | 29.0704996577687  | 19.5775724298285 | 0 | 0 |
| 301 | 7  | 33.2539356605065  | 19.4209518503898 | 0 | 0 |
| 301 | 8  | 34.9979466119097  | 19.8908135887057 | 0 | 0 |
| 301 | 9  | 39.4004106776181  | 19.1077106915126 | 0 | 0 |
| 301 | 10 | 39.9151266255989  | 20.3606753270216 | 0 | 0 |
| 302 | 1  | 36.1560574948665  | 22.709984018601  | 0 | 1 |
| 302 | 2  | 39.6331279945243  | 24.5894309718646 | 0 | 1 |
| 302 | 3  | 42.8199863107461  | 26.3122573456895 | 0 | 1 |
| 302 | 4  | 45.9028062970568  | 25.685775027935  | 0 | 1 |
| 302 | 5  | 49.0814510609172  | 24.9026721307418 | 0 | 1 |

|     |    |                  |                  |   |   |
|-----|----|------------------|------------------|---|---|
| 302 | 6  | 50.9869952087611 | 25.3725338690577 | 0 | 1 |
| 302 | 7  | 51.4414784394251 | 25.685775027935  | 0 | 1 |
| 302 | 8  | 51.9808350444901 | 24.7460515513032 | 0 | 1 |
| 302 | 9  | 52.4599589322382 | 24.2761898129873 | 0 | 1 |
| 302 | 10 | 52.9883641341547 | 24.4328103924259 | 0 | 1 |
| 304 | 1  | 27.5893223819302 | 28.8891129777249 | 0 | 0 |
| 304 | 2  | 39.5865845311431 | 32.2341681646194 | 0 | 1 |
| 304 | 3  | 44.0848733744011 | 30.7136885342128 | 0 | 1 |
| 304 | 4  | 46.715947980835  | 31.9300722385381 | 0 | 1 |
| 304 | 5  | 49.1690622861054 | 31.9300722385381 | 0 | 1 |
| 304 | 6  | 51.8384668035592 | 33.6025998319853 | 0 | 1 |
| 304 | 7  | 54.6721423682409 | 33.298503905904  | 0 | 1 |
| 304 | 8  | 57.492128678987  | 33.754647795026  | 0 | 1 |
| 304 | 9  | 60.1505817932923 | 33.4505518689446 | 0 | 1 |
| 304 | 10 | 61.5167693360712 | 34.2107916841479 | 0 | 1 |
| 306 | 1  | 31.6632443531828 | 20.6416043647689 | 0 | 0 |
| 306 | 2  | 32.9034907597536 | 21.6178964631026 | 0 | 0 |
| 306 | 3  | 35.1019849418207 | 20.9205449642928 | 0 | 0 |
| 306 | 4  | 36.580424366872  | 20.9205449642928 | 0 | 0 |
| 306 | 5  | 37.596167008898  | 21.6178964631026 | 0 | 0 |
| 306 | 6  | 40.9144421629021 | 22.3152479619123 | 0 | 0 |
| 306 | 7  | 45.3278576317591 | 23.4310103600079 | 0 | 0 |
| 306 | 8  | 48.3285420944559 | 23.7099509595318 | 0 | 0 |
| 306 | 9  | 51.2525667351129 | 23.4310103600079 | 0 | 0 |
| 306 | 10 | 54.5653661875428 | 24.4073024583416 | 0 | 0 |
| 307 | 1  | 30.6146475017112 | 25.9990161868122 | 0 | 0 |
| 307 | 2  | 31.1676933607118 | 26.1556367662508 | 0 | 0 |
| 307 | 3  | 31.3483915126626 | 26.1556367662508 | 0 | 0 |
| 307 | 4  | 31.7043121149897 | 27.0953602428826 | 0 | 0 |
| 307 | 5  | 32.37234770705   | 28.0350837195144 | 0 | 0 |
| 307 | 6  | 33.3716632443532 | 28.191704298953  | 0 | 0 |
| 307 | 7  | 34.3819301848049 | 27.8784631400757 | 0 | 0 |
| 307 | 8  | 36.3750855578371 | 28.0350837195144 | 0 | 0 |
| 307 | 9  | 36.5037645448323 | 27.2519808223212 | 0 | 0 |
| 307 | 10 | 37.7111567419576 | 27.5652219811985 | 0 | 0 |
| 308 | 1  | 38.0451745379877 | 23.3878314937347 | 0 | 1 |
| 308 | 2  | 44.4599589322382 | 26.9749222136327 | 0 | 0 |
| 308 | 3  | 48.6269678302533 | 26.9749222136327 | 0 | 0 |
| 308 | 4  | 51.3757700205339 | 28.122791244     | 0 | 0 |
| 308 | 5  | 54.2915811088296 | 28.2662748727959 | 0 | 0 |
| 308 | 6  | 57.2922655715264 | 27.2618894712245 | 0 | 0 |
| 308 | 7  | 61.2539356605065 | 26.8314385848367 | 0 | 0 |
| 308 | 8  | 63.7864476386037 | 28.122791244     | 0 | 0 |
| 308 | 9  | 64.290212183436  | 28.122791244     | 0 | 1 |
| 308 | 10 | 64.7885010266941 | 28.122791244     | 0 | 1 |
| 309 | 1  | 24.993839835729  | 21.7689085910114 | 0 | 0 |
| 309 | 2  | 29.7467488021903 | 25.8588247505348 | 0 | 0 |
| 309 | 3  | 35.5811088295688 | 27.7058836612873 | 0 | 0 |
| 309 | 4  | 40               | 30.6084048067555 | 0 | 0 |
| 309 | 5  | 42.8336755646817 | 29.5529425720398 | 0 | 0 |
| 309 | 6  | 45.5797399041752 | 31.0042031447739 | 0 | 0 |
| 309 | 7  | 48.2518822724162 | 31.4000014827923 | 0 | 0 |
| 309 | 8  | 52.1642710472279 | 29.8168081307187 | 0 | 0 |
| 309 | 9  | 54.7433264887064 | 30.6084048067555 | 0 | 0 |

|     |    |                  |                  |   |   |
|-----|----|------------------|------------------|---|---|
| 309 | 10 | 57.8316221765914 | 28.8932786753425 | 0 | 1 |
| 310 | 1  | 33.9986310746064 | 22.8892703361689 | 1 | 0 |
| 310 | 2  | 40.2464065708419 | 23.6276338954001 | 1 | 1 |
| 310 | 3  | 44.6652977412731 | 22.0032340650914 | 1 | 0 |
| 310 | 4  | 47.2498288843258 | 23.1846157598614 | 1 | 0 |
| 310 | 5  | 50.4941820670773 | 23.3322884717076 | 1 | 1 |
| 310 | 6  | 53.3278576317591 | 25.9903972849401 | 1 | 1 |
| 310 | 7  | 55.8466803559206 | 24.2183247427851 | 1 | 1 |
| 310 | 8  | 58.9568788501027 | 25.6950518612476 | 1 | 1 |
| 310 | 9  | 59.4962354551677 | 24.8090155901701 | 1 | 0 |
| 310 | 10 | 62.0205338809035 | 25.3997064375551 | 1 | 1 |
| 311 | 1  | 25.1690622861054 | 23.869653062037  | 0 | 0 |
| 311 | 2  | 27.6851471594798 | 24.0052760907986 | 0 | 0 |
| 311 | 3  | 29.6646132785763 | 23.7340300332755 | 0 | 0 |
| 311 | 4  | 31.047227926078  | 24.6833912346065 | 0 | 0 |
| 311 | 5  | 32.2847364818617 | 25.2258833496528 | 0 | 0 |
| 311 | 6  | 34.0835044490075 | 26.1752445509838 | 0 | 0 |
| 311 | 7  | 37.9164955509925 | 25.7683754646991 | 0 | 0 |
| 311 | 8  | 40.498288843258  | 29.0233281549769 | 0 | 0 |
| 311 | 9  | 42.7022587268994 | 26.4464906085069 | 0 | 0 |
| 311 | 10 | 44.8268309377139 | 26.5821136372685 | 0 | 0 |
| 312 | 1  | 22.9240246406571 | 22.3152479619123 | 1 | 0 |
| 312 | 2  | 27.5865845311431 | 21.6178964631026 | 1 | 0 |
| 312 | 3  | 33.1690622861054 | 23.9888915590557 | 1 | 0 |
| 312 | 4  | 36.6324435318275 | 21.7573667628645 | 1 | 0 |
| 312 | 5  | 37.9164955509925 | 20.9205449642928 | 1 | 0 |
| 312 | 6  | 41.0020533880903 | 26.4993569547709 | 1 | 0 |
| 312 | 7  | 43.668720054757  | 25.3835945566753 | 1 | 0 |
| 312 | 8  | 47.668720054757  | 24.5467727581036 | 1 | 0 |
| 312 | 9  | 49.5906913073238 | 23.0125994607221 | 1 | 0 |
| 312 | 10 | 53.3990417522245 | 24.1283618588177 | 1 | 0 |
| 314 | 1  | 32.2600958247776 | 27.976825199481  | 1 | 0 |
| 314 | 2  | 34.4613278576318 | 28.1288731625216 | 1 | 0 |
| 314 | 3  | 38.8418891170431 | 27.3686333473183 | 1 | 0 |
| 314 | 4  | 42.5133470225873 | 27.3686333473183 | 1 | 1 |
| 314 | 5  | 45.4264202600958 | 26.6083935321151 | 1 | 0 |
| 314 | 6  | 45.6591375770021 | 26.1522496429931 | 1 | 0 |
| 314 | 7  | 50.2614647501711 | 26.4563455690744 | 1 | 1 |
| 314 | 8  | 55.0006844626968 | 26.4563455690744 | 1 | 0 |
| 314 | 9  | 58.2751540041068 | 26.1522496429931 | 1 | 0 |
| 314 | 10 | 58.6064339493498 | 26.1522496429931 | 1 | 1 |
| 315 | 1  | 29.9192334017796 | 22.5030985300173 | 0 | 1 |
| 315 | 2  | 31.5181382614647 | 23.5674342713019 | 0 | 0 |
| 315 | 3  | 36.4626967830253 | 23.8715301973832 | 0 | 0 |
| 315 | 4  | 40.993839835729  | 25.6961057538711 | 0 | 0 |
| 315 | 5  | 44.8624229979466 | 25.2399618647491 | 0 | 1 |
| 315 | 6  | 47.6440793976728 | 24.6317700125865 | 0 | 1 |
| 315 | 7  | 50.5598904859685 | 26.6083935321151 | 0 | 1 |
| 315 | 8  | 53.5797399041752 | 23.1112903821799 | 0 | 1 |
| 315 | 9  | 56.6351813826146 | 23.1112903821799 | 0 | 1 |
| 315 | 10 | 56.7091033538672 | 23.1112903821799 | 0 | 1 |
| 317 | 1  | 28.4955509924709 | 28.191704298953  | 0 | 0 |
| 317 | 2  | 29.9493497604381 | 27.4086014017599 | 0 | 0 |
| 317 | 3  | 33.9137577002053 | 28.5049454578302 | 0 | 0 |

|     |    |                  |                  |   |   |
|-----|----|------------------|------------------|---|---|
| 317 | 4  | 35.1485284052019 | 28.191704298953  | 0 | 0 |
| 317 | 5  | 37.9137577002053 | 25.8423956073736 | 0 | 0 |
| 317 | 6  | 42.2505133470226 | 28.191704298953  | 0 | 0 |
| 317 | 7  | 45.0814510609172 | 29.9145306727779 | 0 | 1 |
| 317 | 8  | 48.2518822724162 | 28.5049454578302 | 0 | 1 |
| 317 | 9  | 51.5920602327173 | 28.191704298953  | 0 | 0 |
| 317 | 10 | 55.4715947980835 | 29.1314277755848 | 0 | 1 |
| 319 | 1  | 27.4962354551677 | 20.5264750104888 | 1 | 0 |
| 319 | 2  | 28.7802874743326 | 20.2223790844074 | 1 | 0 |
| 319 | 3  | 34.1629021218344 | 20.9826188996107 | 1 | 0 |
| 319 | 4  | 38.4969199178645 | 21.4387627887327 | 1 | 0 |
| 319 | 5  | 41.07871321013   | 20.5264750104888 | 1 | 0 |
| 319 | 6  | 43.8302532511978 | 21.1346668626514 | 1 | 0 |
| 319 | 7  | 46.8309377138946 | 20.6785229735294 | 1 | 0 |
| 319 | 8  | 49.9575633127995 | 21.286714825692  | 1 | 0 |
| 319 | 9  | 52.7529089664613 | 19.7662351952855 | 1 | 0 |
| 319 | 10 | 52.7556468172485 | 19.7662351952855 | 1 | 0 |
| 320 | 1  | 27.3100616016427 | 22.2401222802851 | 0 | 0 |
| 320 | 2  | 29.6700889801506 | 20.9871576447761 | 0 | 0 |
| 320 | 3  | 30.3983572895277 | 20.9871576447761 | 0 | 0 |
| 320 | 4  | 33.5030800821355 | 21.457019383092  | 0 | 0 |
| 320 | 5  | 40.2518822724162 | 21.9268811214079 | 0 | 1 |
| 320 | 6  | 45.2511978097194 | 22.2401222802851 | 0 | 1 |
| 320 | 7  | 48.4188911704312 | 22.3967428597238 | 0 | 1 |
| 320 | 8  | 50.9979466119097 | 23.3364663363555 | 0 | 1 |
| 320 | 9  | 53.8836413415469 | 23.0232251774783 | 0 | 1 |
| 320 | 10 | 56.9993155373032 | 23.96294865411   | 0 | 0 |
| 322 | 1  | 24               | 21.5225443193878 | 0 | 0 |
| 322 | 2  | 30.0835044490075 | 23.9617660089184 | 0 | 0 |
| 322 | 3  | 30.735112936345  | 25.5400859256735 | 0 | 0 |
| 322 | 4  | 33.7549623545517 | 24.1052496377143 | 0 | 0 |
| 322 | 5  | 36.8323066392882 | 22.3834460921633 | 0 | 0 |
| 322 | 6  | 39.9972621492129 | 25.3966022968776 | 0 | 0 |
| 322 | 7  | 40.9993155373032 | 25.1096350392857 | 0 | 0 |
| 322 | 8  | 44.9171800136893 | 23.6747987513265 | 0 | 1 |
| 322 | 9  | 48               | 24.1052496377143 | 0 | 0 |
| 322 | 10 | 50.6858316221766 | 24.3922168953061 | 0 | 1 |
| 323 | 1  | 27.7207392197125 | 20.4981318181129 | 0 | 0 |
| 323 | 2  | 28.580424366872  | 20.9823396563361 | 0 | 0 |
| 323 | 3  | 29.5879534565366 | 20.9823396563361 | 0 | 0 |
| 323 | 4  | 31.5455167693361 | 21.6279501073003 | 0 | 0 |
| 323 | 5  | 32.9582477754962 | 21.4665474945592 | 0 | 0 |
| 323 | 6  | 33.4182067077344 | 22.4349631710055 | 0 | 0 |
| 323 | 7  | 35.3757700205339 | 22.9191710092287 | 0 | 0 |
| 323 | 8  | 39.2470910335387 | 22.9191710092287 | 0 | 0 |
| 323 | 9  | 41.1718001368925 | 24.3717945238981 | 0 | 0 |
| 323 | 10 | 43.1649555099247 | 24.3717945238981 | 0 | 0 |
| 324 | 1  | 29.3360711841205 | 25.8481537169118 | 0 | 0 |
| 324 | 2  | 31.4962354551677 | 25.8481537169118 | 0 | 0 |
| 324 | 3  | 38.7488021902806 | 25.8481537169118 | 0 | 0 |
| 324 | 4  | 43.6632443531828 | 27.6727292733997 | 0 | 1 |
| 324 | 5  | 46.7488021902806 | 27.6727292733997 | 0 | 1 |
| 324 | 6  | 49.1690622861054 | 25.5440577908304 | 0 | 0 |
| 324 | 7  | 52.8843258042437 | 24.6317700125865 | 0 | 0 |

|     |    |                  |                  |   |   |
|-----|----|------------------|------------------|---|---|
| 324 | 8  | 55.4305270362765 | 24.3276740865052 | 0 | 0 |
| 324 | 9  | 58.2121834360027 | 22.199002603936  | 0 | 0 |
| 324 | 10 | 63.4661190965092 | 23.2633383452206 | 0 | 0 |
| 325 | 1  | 22.1683778234086 | 19.2586682185902 | 0 | 0 |
| 325 | 2  | 25.0759753593429 | 22.4684462550219 | 0 | 0 |
| 325 | 3  | 28.1670088980151 | 23.1104018623083 | 0 | 0 |
| 325 | 4  | 31.0855578370979 | 24.1375308339664 | 0 | 0 |
| 325 | 5  | 34.1683778234086 | 23.7523574695946 | 0 | 0 |
| 325 | 6  | 37.6673511293634 | 24.0091397125091 | 0 | 0 |
| 325 | 7  | 39.1129363449692 | 24.7794864412527 | 0 | 1 |
| 325 | 8  | 40.1095140314853 | 24.2659219554237 | 0 | 0 |
| 325 | 9  | 40.6023271731691 | 23.6239663481373 | 0 | 1 |
| 325 | 10 | 41.09787816564   | 23.7523574695946 | 0 | 0 |
| 326 | 1  | 36.662559890486  | 21.9529952057755 | 0 | 0 |
| 326 | 2  | 37.9028062970568 | 22.0964788345714 | 0 | 0 |
| 326 | 3  | 42.9979466119097 | 22.6704133497551 | 0 | 0 |
| 326 | 4  | 47.4962354551677 | 23.5313151225306 | 0 | 0 |
| 326 | 5  | 51.4140999315537 | 24.2487332665102 | 0 | 0 |
| 326 | 6  | 54.2505133470226 | 25.3966022968776 | 0 | 1 |
| 326 | 7  | 57.0814510609172 | 23.6747987513265 | 0 | 1 |
| 326 | 8  | 60.2710472279261 | 23.9617660089184 | 0 | 1 |
| 326 | 9  | 64.0273785078713 | 22.9573806073469 | 0 | 0 |
| 326 | 10 | 65.9028062970568 | 23.6747987513265 | 0 | 1 |
| 327 | 1  | 31.9151266255989 | 25.3725338690577 | 0 | 0 |
| 327 | 2  | 37.3333333333333 | 29.6012895139006 | 0 | 0 |
| 327 | 3  | 42.4202600958248 | 25.5291544484963 | 0 | 0 |
| 327 | 4  | 45.6646132785763 | 27.4086014017599 | 0 | 0 |
| 327 | 5  | 49.3333333333333 | 28.191704298953  | 0 | 0 |
| 327 | 6  | 52.4955509924709 | 28.6615660372689 | 0 | 0 |
| 327 | 7  | 53.968514715948  | 27.4086014017599 | 0 | 0 |
| 327 | 8  | 56.8514715947981 | 26.1556367662508 | 0 | 0 |
| 327 | 9  | 59.3456536618754 | 28.0350837195144 | 0 | 0 |
| 327 | 10 | 62.5106091718001 | 27.7218425606371 | 0 | 1 |
| 328 | 1  | 28.3285420944559 | 27.9793076152041 | 0 | 0 |
| 328 | 2  | 35.9151266255989 | 29.7011111607551 | 0 | 1 |
| 328 | 3  | 37.6947296372348 | 29.844594789551  | 0 | 0 |
| 328 | 4  | 38.4093086926762 | 29.4141439031633 | 0 | 0 |
| 328 | 5  | 39.0006844626968 | 28.4097585015918 | 0 | 1 |
| 328 | 6  | 40.0136892539357 | 24.9661514104898 | 0 | 1 |
| 328 | 7  | 42.2422997946612 | 28.122791244     | 0 | 0 |
| 328 | 8  | 45.3278576317591 | 28.5532421303878 | 0 | 1 |
| 328 | 9  | 48.9993155373032 | 27.4053731000204 | 0 | 0 |
| 328 | 10 | 51.9233401779603 | 29.2706602743673 | 0 | 0 |
| 329 | 1  | 35.8494182067077 | 24.4075641778007 | 0 | 0 |
| 329 | 2  | 35.9151266255989 | 24.4075641778007 | 0 | 0 |
| 329 | 3  | 36.1834360027378 | 24.4075641778007 | 0 | 0 |
| 329 | 4  | 39.1047227926078 | 25.7268919711953 | 0 | 0 |
| 329 | 5  | 41.9164955509925 | 25.8588247505348 | 0 | 0 |
| 329 | 6  | 43.066392881588  | 25.8588247505348 | 0 | 0 |
| 329 | 7  | 46.1683778234086 | 25.4630264125164 | 0 | 0 |
| 329 | 8  | 48.6680355920602 | 24.9352952951586 | 0 | 0 |
| 329 | 9  | 49.6646132785763 | 22.4285724877088 | 0 | 0 |
| 329 | 10 | 51.0006844626968 | 22.4285724877088 | 0 | 0 |
| 331 | 1  | 36.6652977412731 | 19.7662351952855 | 0 | 0 |



|     |    |                  |                  |   |   |
|-----|----|------------------|------------------|---|---|
| 331 | 2  | 38.1464750171116 | 19.3100913061635 | 0 | 0 |
| 331 | 3  | 43.0828199863107 | 19.1580433431228 | 0 | 0 |
| 331 | 4  | 47.4989733059548 | 20.3744270474481 | 0 | 0 |
| 331 | 5  | 51.6659822039699 | 21.286714825692  | 0 | 0 |
| 331 | 6  | 54.1656399726215 | 20.6785229735294 | 0 | 0 |
| 331 | 7  | 57.1663244353183 | 20.5264750104888 | 0 | 0 |
| 331 | 8  | 60.7337440109514 | 21.286714825692  | 0 | 0 |
| 331 | 9  | 64.0793976728268 | 20.3744270474481 | 0 | 0 |
| 331 | 10 | 66.3025325119781 | 21.286714825692  | 0 | 0 |
| 332 | 1  | 33.1334702258727 | 23.9888915590557 | 0 | 1 |
| 332 | 2  | 38.6639288158795 | 25.8020054559611 | 0 | 0 |
| 332 | 3  | 40.1095140314853 | 26.4993569547709 | 0 | 1 |
| 332 | 4  | 43.356605065024  | 26.4993569547709 | 0 | 0 |
| 332 | 5  | 43.4140999315537 | 26.4993569547709 | 0 | 0 |
| 332 | 6  | 46.5571526351814 | 26.7782975542948 | 0 | 1 |
| 332 | 7  | 49.5797399041752 | 26.220416355247  | 0 | 0 |
| 332 | 8  | 51.5482546201232 | 27.0572381538187 | 0 | 0 |
| 332 | 9  | 53.3305954825462 | 26.080946055485  | 0 | 0 |
| 332 | 10 | 55.356605065024  | 25.9414757557231 | 0 | 0 |
| 333 | 1  | 35.5044490075291 | 27.4086014017599 | 0 | 0 |
| 333 | 2  | 37.3771389459274 | 28.5049454578302 | 0 | 1 |
| 333 | 3  | 40               | 27.2519808223212 | 0 | 0 |
| 333 | 4  | 43.1184120465435 | 27.4086014017599 | 0 | 0 |
| 333 | 5  | 43.129363449692  | 27.4086014017599 | 0 | 0 |
| 333 | 6  | 46.1656399726215 | 26.1556367662508 | 0 | 0 |
| 333 | 7  | 49.9986310746064 | 28.191704298953  | 0 | 1 |
| 333 | 8  | 52.9993155373032 | 27.2519808223212 | 0 | 0 |
| 333 | 9  | 55.0308008213552 | 28.191704298953  | 0 | 0 |
| 333 | 10 | 56.9993155373032 | 27.8784631400757 | 0 | 0 |
| 334 | 1  | 29.968514715948  | 22.655146493058  | 0 | 0 |
| 334 | 2  | 32.082135523614  | 23.7194822343426 | 0 | 0 |
| 334 | 3  | 37.5824777549624 | 25.5440577908304 | 0 | 0 |
| 334 | 4  | 42.0013689253936 | 24.3276740865052 | 0 | 0 |
| 334 | 5  | 44.5256673511294 | 23.7194822343426 | 0 | 0 |
| 334 | 6  | 47.2498288843258 | 24.4797220495458 | 0 | 0 |
| 334 | 7  | 50.9158110882957 | 24.0235781604239 | 0 | 0 |
| 334 | 8  | 53.3196440793977 | 23.4153863082612 | 0 | 0 |
| 334 | 9  | 56.9500342231348 | 24.1756261234645 | 0 | 0 |
| 334 | 10 | 63.4798083504449 | 23.4153863082612 | 0 | 0 |
| 337 | 1  | 24.1806981519507 | 23.5674342713019 | 0 | 0 |
| 337 | 2  | 36.7529089664613 | 23.5674342713019 | 0 | 0 |
| 337 | 3  | 39.1211498973306 | 23.2633383452206 | 0 | 0 |
| 337 | 4  | 39.9644079397673 | 23.7194822343426 | 0 | 0 |
| 337 | 5  | 42.0013689253936 | 24.0235781604239 | 0 | 1 |
| 337 | 6  | 44.8377823408624 | 25.0879139017085 | 0 | 0 |
| 337 | 7  | 49.5277207392197 | 23.5674342713019 | 0 | 1 |
| 337 | 8  | 52.5667351129363 | 24.6317700125865 | 0 | 0 |
| 337 | 9  | 55.9014373716632 | 23.2633383452206 | 0 | 1 |
| 337 | 10 | 62.1190965092402 | 22.5030985300173 | 0 | 1 |
| 338 | 1  | 26.590006844627  | 26.0396215222222 | 0 | 0 |
| 338 | 2  | 37.0841889117043 | 27.1246057523148 | 0 | 0 |
| 338 | 3  | 38.4175222450376 | 27.1246057523148 | 0 | 0 |
| 338 | 4  | 41.6646132785763 | 27.1246057523148 | 0 | 0 |
| 338 | 5  | 45.2511978097194 | 27.1246057523148 | 0 | 0 |

|     |    |                  |                  |   |   |
|-----|----|------------------|------------------|---|---|
| 338 | 6  | 47.9151266255989 | 26.8533596947917 | 0 | 0 |
| 338 | 7  | 51.378507871321  | 24.0052760907986 | 0 | 0 |
| 338 | 8  | 54.2915811088296 | 22.6490458031829 | 0 | 0 |
| 338 | 9  | 57.1909650924025 | 22.5134227744213 | 0 | 0 |
| 338 | 10 | 60.0328542094456 | 21.970930659375  | 0 | 0 |
| 339 | 1  | 27.419575633128  | 26.3108675797454 | 0 | 0 |
| 339 | 2  | 33.9137577002053 | 26.9889827235532 | 0 | 0 |
| 339 | 3  | 35.6577686516085 | 25.4971294071759 | 0 | 0 |
| 339 | 4  | 36.0246406570842 | 26.3108675797454 | 0 | 0 |
| 339 | 5  | 37.3086926762491 | 25.6327524359375 | 0 | 0 |
| 339 | 6  | 37.3333333333333 | 25.2258833496528 | 0 | 0 |
| 339 | 7  | 38.0342231348392 | 26.5821136372685 | 0 | 0 |
| 339 | 8  | 39.0116358658453 | 26.5821136372685 | 0 | 0 |
| 339 | 9  | 40.3340177960301 | 25.9039984934606 | 0 | 0 |
| 339 | 10 | 44.0711841204654 | 26.0396215222222 | 0 | 0 |
| 340 | 1  | 28.7474332648871 | 23.7340300332755 | 0 | 0 |
| 340 | 2  | 36.9965776865161 | 25.0902603208912 | 0 | 0 |
| 340 | 3  | 41.9986310746064 | 23.0559148894676 | 0 | 0 |
| 340 | 4  | 45.2484599589322 | 23.869653062037  | 0 | 1 |
| 340 | 5  | 48.082135523614  | 23.3271609469907 | 0 | 0 |
| 340 | 6  | 50.1656399726215 | 23.7340300332755 | 0 | 0 |
| 340 | 7  | 53.2566735112936 | 23.869653062037  | 0 | 0 |
| 340 | 8  | 57.1882272416153 | 23.7340300332755 | 0 | 1 |
| 340 | 9  | 59.8193018480493 | 23.0559148894676 | 0 | 0 |
| 340 | 10 | 62.5325119780972 | 23.3271609469907 | 0 | 1 |
| 341 | 1  | 52.5585215605749 | 30.5050938080579 | 0 | 0 |
| 341 | 2  | 53.4127310061602 | 31.4735094845041 | 0 | 0 |
| 341 | 3  | 56.0164271047228 | 31.3121068717631 | 0 | 0 |
| 341 | 4  | 57.4976043805613 | 32.7647303864325 | 0 | 0 |
| 341 | 5  | 59.5674195756331 | 30.3436911953168 | 0 | 0 |
| 341 | 6  | 60.5448323066393 | 31.150704259022  | 0 | 0 |
| 341 | 7  | 61.5468856947296 | 31.9577173227273 | 0 | 1 |
| 341 | 8  | 62.5571526351814 | 31.9577173227273 | 0 | 1 |
| 341 | 9  | 62.6858316221766 | 30.989301646281  | 0 | 1 |
| 341 | 10 | 63.5783709787817 | 30.6664964207989 | 0 | 1 |
| 343 | 1  | 23.8329911019849 | 23.9229793190926 | 0 | 0 |
| 343 | 2  | 24.3696098562628 | 23.6276338954001 | 0 | 1 |
| 343 | 3  | 24.7556468172485 | 24.2183247427851 | 0 | 1 |
| 343 | 4  | 27.5564681724846 | 24.8090155901701 | 0 | 1 |
| 343 | 5  | 27.7344284736482 | 24.8090155901701 | 0 | 1 |
| 343 | 6  | 28.1615331964408 | 25.1043610138626 | 0 | 0 |
| 343 | 7  | 29.6810403832991 | 25.3997064375551 | 0 | 0 |
| 343 | 8  | 31.3675564681725 | 25.1043610138626 | 0 | 0 |
| 343 | 9  | 34.4941820670773 | 25.6950518612476 | 0 | 0 |
| 343 | 10 | 37.8316221765914 | 25.2520337257089 | 0 | 0 |
| 344 | 1  | 27.5893223819302 | 23.0559148894676 | 0 | 0 |
| 344 | 2  | 31.0855578370979 | 26.4464906085069 | 0 | 0 |
| 344 | 3  | 35.917864476386  | 25.6327524359375 | 0 | 0 |
| 344 | 4  | 40.9993155373032 | 25.7683754646991 | 0 | 0 |
| 344 | 5  | 44.2518822724162 | 28.6164590686921 | 0 | 0 |
| 344 | 6  | 48.4188911704312 | 27.8027208961227 | 0 | 1 |
| 344 | 7  | 50.4531143052704 | 26.3108675797454 | 0 | 1 |
| 344 | 8  | 54.1519507186858 | 27.5314748385995 | 0 | 1 |
| 344 | 9  | 54.1902806297057 | 27.6670978673611 | 0 | 1 |

|     |    |                  |                  |   |   |
|-----|----|------------------|------------------|---|---|
| 344 | 10 | 54.3682409308693 | 26.5821136372685 | 0 | 1 |
| 345 | 1  | 27.8494182067077 | 22.5939249124764 | 0 | 0 |
| 345 | 2  | 29.3305954825462 | 21.8555613532451 | 0 | 0 |
| 345 | 3  | 30.2012320328542 | 21.8555613532451 | 0 | 0 |
| 345 | 4  | 32.37234770705   | 21.7078886413989 | 0 | 0 |
| 345 | 5  | 33.7713894592745 | 22.7415976243226 | 0 | 0 |
| 345 | 6  | 34.3299110198494 | 22.1509067769376 | 0 | 0 |
| 345 | 7  | 36.2327173169062 | 23.0369430480151 | 0 | 0 |
| 345 | 8  | 36.3367556468172 | 22.8892703361689 | 0 | 0 |
| 345 | 9  | 38.3299110198494 | 22.8892703361689 | 0 | 0 |
| 345 | 10 | 40.394250513347  | 24.2183247427851 | 0 | 0 |
| 347 | 1  | 32.1286789869952 | 29.0411609407656 | 0 | 0 |
| 347 | 2  | 35.4113620807666 | 27.064537421237  | 0 | 0 |
| 347 | 3  | 35.9780971937029 | 28.2809211255623 | 0 | 0 |
| 347 | 4  | 37.0294318959617 | 27.3686333473183 | 0 | 0 |
| 347 | 5  | 38.1437371663244 | 28.1288731625216 | 0 | 0 |
| 347 | 6  | 38.9787816563997 | 28.7370650146843 | 0 | 0 |
| 347 | 7  | 40.1642710472279 | 28.2809211255623 | 0 | 0 |
| 347 | 8  | 40.9801505817933 | 28.1288731625216 | 0 | 0 |
| 347 | 9  | 42.0068446269678 | 28.4329690886029 | 0 | 0 |
| 347 | 10 | 42.5626283367556 | 28.4329690886029 | 0 | 0 |
| 348 | 1  | 32.3340177960301 | 21.6178964631026 | 0 | 0 |
| 348 | 2  | 33.347022587269  | 23.0125994607221 | 0 | 0 |
| 348 | 3  | 35.3976728268309 | 22.5941885614362 | 0 | 0 |
| 348 | 4  | 37.4182067077344 | 23.5704806597699 | 0 | 0 |
| 348 | 5  | 38.444900752909  | 23.152069760484  | 0 | 0 |
| 348 | 6  | 39.4715947980835 | 23.4310103600079 | 0 | 0 |
| 348 | 7  | 41.4182067077344 | 23.8494212592938 | 0 | 0 |
| 348 | 8  | 44.4818617385353 | 25.6625351561992 | 0 | 0 |
| 348 | 9  | 46.4996577686516 | 26.9177678540567 | 0 | 0 |
| 348 | 10 | 48.4900752908966 | 26.4993569547709 | 0 | 0 |
| 349 | 1  | 25.9986310746064 | 23.4930869157942 | 0 | 0 |
| 349 | 2  | 31.3319644079398 | 26.7821190840053 | 0 | 0 |
| 349 | 3  | 31.8028747433265 | 25.9990161868122 | 0 | 0 |
| 349 | 4  | 32.3778234086242 | 25.5291544484963 | 0 | 1 |
| 349 | 5  | 35.8877481177276 | 25.5291544484963 | 0 | 1 |
| 349 | 6  | 35.9151266255989 | 25.3725338690577 | 0 | 0 |
| 349 | 7  | 39.5811088295688 | 27.4086014017599 | 0 | 1 |
| 349 | 8  | 42.2477754962355 | 25.8423956073736 | 0 | 0 |
| 349 | 9  | 45.3333333333333 | 26.6254985045667 | 0 | 1 |
| 349 | 10 | 48.2409308692676 | 26.3122573456895 | 0 | 1 |
| 350 | 1  | 30.0616016427105 | 23.8715301973832 | 0 | 0 |
| 350 | 2  | 34.2450376454483 | 25.5440577908304 | 0 | 0 |
| 350 | 3  | 35.2169746748802 | 26.9124894581964 | 0 | 0 |
| 350 | 4  | 36.5968514715948 | 24.7838179756272 | 0 | 0 |
| 350 | 5  | 37.5195071868583 | 25.8481537169118 | 0 | 0 |
| 350 | 6  | 37.9986310746064 | 26.1522496429931 | 0 | 0 |
| 350 | 7  | 40.0082135523614 | 27.8247772364403 | 0 | 1 |
| 350 | 8  | 41.0431211498973 | 27.520681310359  | 0 | 1 |
| 350 | 9  | 42.0232717316906 | 27.064537421237  | 0 | 1 |
| 350 | 10 | 42.8774811772758 | 25.6961057538711 | 0 | 1 |
| 351 | 1  | 36.5010266940452 | 24.5136701664776 | 0 | 0 |
| 351 | 2  | 37.0130047912389 | 25.6950518612476 | 0 | 0 |
| 351 | 3  | 39.9808350444901 | 27.4671244034026 | 0 | 0 |

|     |    |                  |                  |   |   |
|-----|----|------------------|------------------|---|---|
| 351 | 4  | 40.1670088980151 | 25.8427245730939 | 0 | 0 |
| 351 | 5  | 42.7652292950034 | 24.0706520309389 | 0 | 0 |
| 351 | 6  | 43.1266255989049 | 24.0706520309389 | 0 | 0 |
| 351 | 7  | 47.1676933607118 | 24.8090155901701 | 0 | 0 |
| 351 | 8  | 51.1676933607118 | 29.5345423692502 | 0 | 0 |
| 351 | 9  | 53.2457221081451 | 28.7961788100189 | 0 | 0 |
| 351 | 10 | 55.3347022587269 | 29.5345423692502 | 0 | 0 |
| 352 | 1  | 28.5859000684463 | 23.9229793190926 | 0 | 0 |
| 352 | 2  | 28.911704312115  | 23.1846157598614 | 0 | 0 |
| 352 | 3  | 30.5790554414784 | 24.9566883020164 | 0 | 0 |
| 352 | 4  | 32.4462696783025 | 25.1043610138626 | 0 | 0 |
| 352 | 5  | 34.4175222450376 | 25.2520337257089 | 0 | 0 |
| 352 | 6  | 34.7460643394935 | 25.3997064375551 | 0 | 0 |
| 352 | 7  | 36.2245037645448 | 24.3659974546314 | 0 | 0 |
| 352 | 8  | 36.7583846680356 | 25.8427245730939 | 0 | 0 |
| 352 | 9  | 39.1649555099247 | 25.3997064375551 | 0 | 0 |
| 352 | 10 | 43.0828199863107 | 25.1043610138626 | 0 | 0 |
| 355 | 1  | 39.6167008898015 | 27.9101425389414 | 0 | 0 |
| 355 | 2  | 41.5797399041752 | 28.6485060981727 | 0 | 0 |
| 355 | 3  | 43.8767967145791 | 29.3868696574039 | 0 | 0 |
| 355 | 4  | 45.8316221765914 | 30.4205786403277 | 0 | 0 |
| 355 | 5  | 47.8028747433265 | 27.3194516915564 | 0 | 0 |
| 355 | 6  | 48.7857631759069 | 26.8764335560176 | 0 | 0 |
| 355 | 7  | 49.7440109514031 | 27.6147971152489 | 0 | 0 |
| 355 | 8  | 50.7214236824093 | 27.0241062678639 | 0 | 0 |
| 355 | 9  | 51.7481177275838 | 27.1717789797101 | 0 | 0 |
| 355 | 10 | 51.9863107460643 | 27.1717789797101 | 0 | 0 |
| 357 | 1  | 34.1683778234086 | 24.3922168953061 | 0 | 0 |
| 357 | 2  | 37.3388090349076 | 25.9705368120612 | 0 | 0 |
| 357 | 3  | 40.7474332648871 | 24.2487332665102 | 0 | 0 |
| 357 | 4  | 43.8329911019849 | 25.2531186680816 | 0 | 0 |
| 357 | 5  | 46.776180698152  | 25.5400859256735 | 0 | 0 |
| 357 | 6  | 48.7474332648871 | 26.400987698449  | 0 | 0 |
| 357 | 7  | 50.7624914442163 | 26.400987698449  | 0 | 0 |
| 357 | 8  | 52.7474332648871 | 26.400987698449  | 0 | 0 |
| 357 | 9  | 54.7624914442163 | 26.8314385848367 | 0 | 0 |
| 357 | 10 | 56.7474332648871 | 26.400987698449  | 0 | 0 |
| 358 | 1  | 36.9144421629021 | 22.9573806073469 | 0 | 0 |
| 358 | 2  | 43.8795345653662 | 23.2443478649388 | 0 | 0 |
| 358 | 3  | 48.4955509924709 | 23.8182823801224 | 0 | 0 |
| 358 | 4  | 51.5811088295688 | 24.1052496377143 | 0 | 0 |
| 358 | 5  | 54.4175222450376 | 22.6704133497551 | 0 | 0 |
| 358 | 6  | 57.2594113620808 | 23.2443478649388 | 0 | 0 |
| 358 | 7  | 60.2573579739904 | 23.5313151225306 | 0 | 0 |
| 358 | 8  | 60.4845995893224 | 23.2443478649388 | 0 | 0 |
| 358 | 9  | 61.3524982888433 | 23.2443478649388 | 0 | 0 |
| 358 | 10 | 62.3572895277207 | 23.2443478649388 | 0 | 0 |
| 359 | 1  | 28.4188911704312 | 23.9617660089184 | 0 | 0 |
| 359 | 2  | 31.0855578370979 | 23.6747987513265 | 0 | 0 |
| 359 | 3  | 32.5585215605749 | 25.5400859256735 | 0 | 0 |
| 359 | 4  | 34.3353867214237 | 25.3966022968776 | 0 | 0 |
| 359 | 5  | 36.6598220396988 | 24.679184152898  | 0 | 0 |
| 359 | 6  | 38.3353867214237 | 24.679184152898  | 0 | 0 |
| 359 | 7  | 40.7693360711841 | 24.9661514104898 | 0 | 0 |

|     |    |                  |                  |   |   |
|-----|----|------------------|------------------|---|---|
| 359 | 8  | 43.0855578370979 | 23.9617660089184 | 0 | 0 |
| 359 | 9  | 45.2511978097194 | 25.2531186680816 | 0 | 0 |
| 359 | 10 | 48.5037645448323 | 24.679184152898  | 0 | 0 |
| 360 | 1  | 28.4134154688569 | 22.4285724877088 | 0 | 0 |
| 360 | 2  | 28.8432580424367 | 22.2966397083693 | 0 | 0 |
| 360 | 3  | 30.9787816563997 | 23.2201691637455 | 0 | 0 |
| 360 | 4  | 31.917864476386  | 23.2201691637455 | 0 | 0 |
| 360 | 5  | 32.9993155373032 | 23.4840347224245 | 0 | 0 |
| 360 | 6  | 34.3518138261465 | 22.0327741496904 | 0 | 0 |
| 360 | 7  | 34.8637919233402 | 23.0882363844061 | 0 | 0 |
| 360 | 8  | 36.7611225188227 | 23.7479002811034 | 0 | 0 |
| 360 | 9  | 38.6639288158795 | 23.4840347224245 | 0 | 0 |
| 360 | 10 | 40.6762491444216 | 23.8798330604429 | 0 | 0 |
| 361 | 1  | 26.5817932922656 | 23.7099509595318 | 0 | 0 |
| 361 | 2  | 28.5338809034908 | 25.1046539571514 | 0 | 0 |
| 361 | 3  | 30.4750171115674 | 25.8020054559611 | 0 | 0 |
| 361 | 4  | 31.0006844626968 | 26.220416355247  | 0 | 0 |
| 361 | 5  | 32.3750855578371 | 26.6388272545328 | 0 | 0 |
| 361 | 6  | 33.3305954825462 | 27.1967084535806 | 0 | 0 |
| 361 | 7  | 34.3052703627652 | 27.4756490531045 | 0 | 0 |
| 361 | 8  | 36.2518822724162 | 27.8940599523904 | 0 | 0 |
| 361 | 9  | 38.1711156741958 | 27.4756490531045 | 0 | 0 |
| 361 | 10 | 40.1670088980151 | 27.6151193528665 | 0 | 0 |
| 362 | 1  | 26.8993839835729 | 20.2078312854745 | 0 | 0 |
| 362 | 2  | 31.6960985626283 | 20.6147003717593 | 0 | 0 |
| 362 | 3  | 38.8364134154689 | 25.3615063784144 | 0 | 0 |
| 362 | 4  | 43.5537303216975 | 24.8190142633681 | 0 | 1 |
| 362 | 5  | 46.9869952087611 | 24.1408991195602 | 0 | 0 |
| 362 | 6  | 49.7467488021903 | 23.7340300332755 | 0 | 0 |
| 362 | 7  | 53.138945927447  | 23.869653062037  | 0 | 0 |
| 362 | 8  | 55.9069130732375 | 23.7340300332755 | 0 | 0 |
| 362 | 9  | 58.8747433264887 | 23.869653062037  | 0 | 0 |
| 362 | 10 | 62.1300479123888 | 23.7340300332755 | 0 | 0 |
| 363 | 1  | 35.1622176591376 | 25.8427245730939 | 0 | 0 |
| 363 | 2  | 37.4948665297741 | 24.8090155901701 | 0 | 0 |
| 363 | 3  | 44.4106776180698 | 26.7287608441714 | 0 | 1 |
| 363 | 4  | 49.160848733744  | 28.7961788100189 | 0 | 1 |
| 363 | 5  | 52.0766598220397 | 26.5810881323251 | 0 | 1 |
| 363 | 6  | 55.6632443531828 | 26.4334154204789 | 0 | 1 |
| 363 | 7  | 58.2943189596167 | 27.3194516915564 | 0 | 0 |
| 363 | 8  | 60.7802874743326 | 26.8764335560176 | 0 | 1 |
| 363 | 9  | 63.9863107460643 | 25.8427245730939 | 0 | 1 |
| 363 | 10 | 67.8740588637919 | 26.8764335560176 | 0 | 1 |
| 364 | 1  | 33.6755646817248 | 20.6785229735294 | 0 | 0 |
| 364 | 2  | 35.1676933607118 | 20.8305709365701 | 0 | 0 |
| 364 | 3  | 40.8323066392882 | 21.286714825692  | 0 | 0 |
| 364 | 4  | 46.0013689253936 | 21.286714825692  | 0 | 0 |
| 364 | 5  | 49.1690622861054 | 21.742858714814  | 0 | 0 |
| 364 | 6  | 52.3340177960301 | 22.3510505669766 | 0 | 0 |
| 364 | 7  | 56               | 23.5674342713019 | 0 | 0 |
| 364 | 8  | 59.0006844626968 | 24.6317700125865 | 0 | 0 |
| 364 | 9  | 61.7522245037645 | 24.0235781604239 | 0 | 0 |
| 364 | 10 | 62.009582477755  | 25.0879139017085 | 0 | 0 |
| 366 | 1  | 42.3299110198494 | 26.6504214265716 | 0 | 0 |

|     |    |                  |                  |   |   |
|-----|----|------------------|------------------|---|---|
| 366 | 2  | 44.2956878850103 | 27.04621976459   | 0 | 0 |
| 366 | 3  | 46.2696783025325 | 27.3100853232689 | 0 | 0 |
| 366 | 4  | 46.7652292950034 | 27.9697492199662 | 0 | 0 |
| 366 | 5  | 48.2464065708419 | 27.4420181026084 | 0 | 0 |
| 366 | 6  | 48.7419575633128 | 27.4420181026084 | 0 | 0 |
| 366 | 7  | 50.2121834360027 | 28.4974803373241 | 0 | 0 |
| 366 | 8  | 52.1615331964408 | 28.8932786753425 | 0 | 0 |
| 366 | 9  | 54.5845311430527 | 27.7058836612873 | 0 | 0 |
| 366 | 10 | 56.2464065708419 | 28.1016819993057 | 0 | 0 |
| 367 | 1  | 29.7549623545517 | 24.4121451770833 | 0 | 0 |
| 367 | 2  | 32.5037645448323 | 27.9383439248843 | 0 | 0 |
| 367 | 3  | 38.1683778234086 | 26.4464906085069 | 0 | 0 |
| 367 | 4  | 42.5051334702259 | 29.1589511837384 | 0 | 1 |
| 367 | 5  | 45.0869267624914 | 28.7520820974537 | 0 | 1 |
| 367 | 6  | 47.6714579055441 | 29.0233281549769 | 0 | 1 |
| 367 | 7  | 50.507871321013  | 28.4808360399306 | 0 | 1 |
| 367 | 8  | 50.8418891170431 | 27.5314748385995 | 0 | 0 |
| 367 | 9  | 53.8699520876112 | 29.2945742125    | 0 | 1 |
| 367 | 10 | 55.8384668035592 | 30.6508045001157 | 0 | 0 |
| 368 | 1  | 33.719370294319  | 24.5394969571402 | 0 | 0 |
| 368 | 2  | 36               | 25.067228074498  | 0 | 0 |
| 368 | 3  | 37.0540725530459 | 25.067228074498  | 0 | 0 |
| 368 | 4  | 40.4873374401095 | 25.067228074498  | 0 | 0 |
| 368 | 5  | 40.7501711156742 | 25.067228074498  | 0 | 0 |
| 368 | 6  | 46.7515400410678 | 24.8033625158191 | 0 | 1 |
| 368 | 7  | 50.4750171115674 | 25.331093633177  | 0 | 0 |
| 368 | 8  | 51.0006844626968 | 25.7268919711953 | 0 | 0 |
| 368 | 9  | 52.062970568104  | 25.1991608538375 | 0 | 0 |
| 368 | 10 | 53.1663244353183 | 25.1991608538375 | 0 | 0 |
| 369 | 1  | 27.5811088295688 | 20.8453791356352 | 0 | 0 |
| 369 | 2  | 33.4976043805613 | 23.7479002811034 | 0 | 0 |
| 369 | 3  | 38.1629021218344 | 23.0882363844061 | 0 | 0 |
| 369 | 4  | 41.2484599589322 | 23.0882363844061 | 0 | 0 |
| 369 | 5  | 44.3285420944559 | 24.1436986191218 | 0 | 0 |
| 369 | 6  | 47.3292265571526 | 24.0117658397823 | 0 | 1 |
| 369 | 7  | 50.0068446269678 | 23.2201691637455 | 0 | 0 |
| 369 | 8  | 53.0540725530459 | 23.4840347224245 | 0 | 0 |
| 369 | 9  | 56.3093771389459 | 23.8798330604429 | 0 | 1 |
| 369 | 10 | 59.1622176591376 | 24.8033625158191 | 0 | 1 |
| 370 | 1  | 33.5003422313484 | 23.8798330604429 | 0 | 0 |
| 370 | 2  | 34.5817932922656 | 22.6924380463877 | 0 | 0 |
| 370 | 3  | 36.4134154688569 | 24.5394969571402 | 0 | 0 |
| 370 | 4  | 38.3655030800821 | 25.5949591918559 | 0 | 0 |
| 370 | 5  | 40.2518822724162 | 25.067228074498  | 0 | 0 |
| 370 | 6  | 42.2313483915127 | 24.8033625158191 | 0 | 0 |
| 370 | 7  | 44.2518822724162 | 26.1226903092137 | 0 | 0 |
| 370 | 8  | 46.2669404517454 | 27.5739508819478 | 0 | 0 |
| 370 | 9  | 48.580424366872  | 27.04621976459   | 0 | 0 |
| 370 | 10 | 50.5872689938398 | 27.4420181026084 | 0 | 0 |
| 372 | 1  | 27.170431211499  | 27.3686333473183 | 0 | 0 |
| 372 | 2  | 32.9993155373032 | 26.4563455690744 | 0 | 0 |
| 372 | 3  | 37.4154688569473 | 27.3686333473183 | 0 | 0 |
| 372 | 4  | 41.4154688569473 | 25.0879139017085 | 0 | 0 |
| 372 | 5  | 44.0848733744011 | 27.6727292733997 | 0 | 0 |

|     |    |                  |                  |   |   |
|-----|----|------------------|------------------|---|---|
| 372 | 6  | 47.2470910335387 | 27.6727292733997 | 0 | 0 |
| 372 | 7  | 50.6338124572211 | 25.6961057538711 | 0 | 0 |
| 372 | 8  | 53.1909650924025 | 26.4563455690744 | 0 | 0 |
| 372 | 9  | 55.9507186858316 | 26.6083935321151 | 0 | 0 |
| 372 | 10 | 58.1848049281314 | 26.6083935321151 | 0 | 0 |
| 373 | 1  | 38.6721423682409 | 20.9205449642928 | 0 | 0 |
| 373 | 2  | 38.8309377138946 | 20.6416043647689 | 0 | 0 |
| 373 | 3  | 41.8507871321013 | 19.9442528659591 | 0 | 0 |
| 373 | 4  | 44.8350444900753 | 19.3863716669113 | 0 | 0 |
| 373 | 5  | 47.8110882956879 | 20.0837231657211 | 0 | 0 |
| 373 | 6  | 49.4565366187543 | 18.1311389690538 | 0 | 0 |
| 373 | 7  | 49.9548254620123 | 17.433787470244  | 0 | 0 |
| 373 | 8  | 50.4421629021218 | 16.8759062711962 | 0 | 0 |
| 373 | 9  | 51.8329911019849 | 16.7364359714342 | 0 | 0 |
| 373 | 10 | 53.9411362080767 | 16.7364359714342 | 0 | 0 |
| 375 | 1  | 29.5058179329227 | 27.2618894712245 | 1 | 1 |
| 375 | 2  | 31.9698836413415 | 25.1096350392857 | 1 | 0 |
| 375 | 3  | 38.0013689253936 | 25.9705368120612 | 1 | 1 |
| 375 | 4  | 42.8172484599589 | 25.8270531832653 | 1 | 0 |
| 375 | 5  | 42.8336755646817 | 25.8270531832653 | 1 | 0 |
| 375 | 6  | 45.7522245037645 | 25.1096350392857 | 1 | 0 |
| 375 | 7  | 48.5037645448323 | 25.8270531832653 | 1 | 1 |
| 375 | 8  | 51.5920602327173 | 25.1096350392857 | 1 | 1 |
| 375 | 9  | 54.3928815879535 | 24.3922168953061 | 1 | 0 |
| 375 | 10 | 57.4976043805613 | 24.679184152898  | 1 | 1 |
| 376 | 1  | 32.848733744011  | 26.4464906085069 | 0 | 0 |
| 376 | 2  | 35.4989733059548 | 26.4464906085069 | 0 | 1 |
| 376 | 3  | 37.886379192334  | 28.4808360399306 | 0 | 1 |
| 376 | 4  | 40.8323066392882 | 27.8027208961227 | 0 | 1 |
| 376 | 5  | 41.1225188227242 | 27.395851809838  | 0 | 0 |
| 376 | 6  | 45.6673511293634 | 29.1589511837384 | 0 | 1 |
| 376 | 7  | 45.7029431895962 | 29.0233281549769 | 0 | 1 |
| 376 | 8  | 49.6673511293634 | 28.4808360399306 | 0 | 1 |
| 376 | 9  | 52.1670088980151 | 29.4301972412616 | 0 | 1 |
| 376 | 10 | 55.1676933607118 | 28.0739669536458 | 0 | 1 |
| 377 | 1  | 26.2532511978097 | 27.7624698270951 | 0 | 0 |
| 377 | 2  | 29.5824777549624 | 27.3194516915564 | 0 | 0 |
| 377 | 3  | 32.9828884325804 | 27.3194516915564 | 0 | 0 |
| 377 | 4  | 36.4188911704312 | 30.1252332166352 | 0 | 0 |
| 377 | 5  | 37.4811772758385 | 30.2729059284814 | 0 | 0 |
| 377 | 6  | 37.9794661190965 | 27.1717789797101 | 0 | 0 |
| 377 | 7  | 39.1457905544148 | 30.4205786403277 | 0 | 0 |
| 377 | 8  | 40.8323066392882 | 30.5682513521739 | 0 | 0 |
| 377 | 9  | 43.2416153319644 | 28.6485060981727 | 0 | 0 |
| 377 | 10 | 43.5811088295688 | 28.6485060981727 | 0 | 0 |
| 378 | 1  | 24.6652977412731 | 21.5908107517734 | 0 | 0 |
| 378 | 2  | 26.5872689938398 | 23.2633383452206 | 0 | 0 |
| 378 | 3  | 29.7659137577002 | 24.0235781604239 | 0 | 0 |
| 378 | 4  | 31.1676933607118 | 24.6317700125865 | 0 | 0 |
| 378 | 5  | 32.9199178644764 | 26.1522496429931 | 0 | 0 |
| 378 | 6  | 34.0944558521561 | 26.4563455690744 | 0 | 0 |
| 378 | 7  | 37.4209445585216 | 27.520681310359  | 0 | 0 |
| 378 | 8  | 41.1882272416153 | 27.8247772364403 | 0 | 0 |
| 378 | 9  | 41.7494866529774 | 27.6727292733997 | 0 | 0 |

|     |    |                  |                  |   |   |
|-----|----|------------------|------------------|---|---|
| 378 | 10 | 42.8062970568104 | 26.3042976060337 | 0 | 0 |
| 379 | 1  | 34.8966461327858 | 24.2761898129873 | 0 | 0 |
| 379 | 2  | 35.9151266255989 | 25.685775027935  | 0 | 0 |
| 379 | 3  | 37.056810403833  | 25.5291544484963 | 0 | 0 |
| 379 | 4  | 37.3716632443532 | 25.8423956073736 | 0 | 0 |
| 379 | 5  | 38.1957563312799 | 25.9990161868122 | 0 | 0 |
| 379 | 6  | 39.4004106776181 | 26.6254985045667 | 0 | 0 |
| 379 | 7  | 40.1560574948665 | 25.8423956073736 | 0 | 0 |
| 379 | 8  | 41.3333333333333 | 26.7821190840053 | 0 | 0 |
| 379 | 9  | 42.7433264887064 | 28.191704298953  | 0 | 0 |
| 379 | 10 | 44.0711841204654 | 28.191704298953  | 0 | 0 |
| 380 | 1  | 33.0814510609172 | 25.3966022968776 | 0 | 0 |
| 380 | 2  | 38.0835044490075 | 25.1096350392857 | 0 | 0 |
| 380 | 3  | 40.9828884325804 | 25.1096350392857 | 0 | 0 |
| 380 | 4  | 44.1670088980151 | 23.6747987513265 | 0 | 1 |
| 380 | 5  | 47.7535934291581 | 25.3966022968776 | 0 | 0 |
| 380 | 6  | 50.4421629021218 | 24.3922168953061 | 0 | 0 |
| 380 | 7  | 52.3340177960301 | 25.1096350392857 | 0 | 0 |
| 380 | 8  | 54.3353867214237 | 24.3922168953061 | 0 | 0 |
| 380 | 9  | 54.9459274469541 | 24.3922168953061 | 0 | 0 |
| 380 | 10 | 56.249144421629  | 25.1096350392857 | 0 | 0 |
| 381 | 1  | 32.9993155373032 | 21.6279501073003 | 0 | 0 |
| 381 | 2  | 34.9815195071869 | 22.7577683964876 | 0 | 0 |
| 381 | 3  | 35.9644079397673 | 23.0805736219697 | 0 | 0 |
| 381 | 4  | 36.933607118412  | 22.4349631710055 | 0 | 0 |
| 381 | 5  | 37.9164955509925 | 22.1121579455234 | 0 | 0 |
| 381 | 6  | 38.9075975359343 | 22.5963657837466 | 0 | 0 |
| 381 | 7  | 39.2443531827515 | 25.6630154258264 | 0 | 0 |
| 381 | 8  | 39.9096509240246 | 22.9191710092287 | 0 | 0 |
| 381 | 9  | 44.4134154688569 | 24.210391911157  | 0 | 0 |
| 381 | 10 | 47.4989733059548 | 24.5331971366391 | 0 | 0 |
| 382 | 1  | 37.5852156057495 | 25.1043610138626 | 0 | 0 |
| 382 | 2  | 43.668720054757  | 25.3997064375551 | 0 | 0 |
| 382 | 3  | 48.7556468172485 | 27.1717789797101 | 0 | 0 |
| 382 | 4  | 51.917864476386  | 25.5473791494014 | 0 | 0 |
| 382 | 5  | 54.6694045174538 | 25.1043610138626 | 0 | 1 |
| 382 | 6  | 57.7549623545517 | 24.9566883020164 | 0 | 0 |
| 382 | 7  | 60.5010266940452 | 25.6950518612476 | 0 | 1 |
| 382 | 8  | 63.6495550992471 | 24.9566883020164 | 0 | 1 |
| 382 | 9  | 66.0260095824778 | 24.2183247427851 | 0 | 0 |
| 382 | 10 | 66.0287474332649 | 24.2183247427851 | 0 | 0 |
| 383 | 1  | 25.2895277207392 | 21.7702605419693 | 0 | 0 |
| 383 | 2  | 25.3360711841205 | 21.7702605419693 | 0 | 0 |
| 383 | 3  | 36.9445585215606 | 24.2761898129873 | 0 | 0 |
| 383 | 4  | 39.3347022587269 | 23.0232251774783 | 0 | 0 |
| 383 | 5  | 41.6892539356605 | 25.0592927101804 | 0 | 0 |
| 383 | 6  | 45.7604380561259 | 22.709984018601  | 0 | 1 |
| 383 | 7  | 48.1971252566735 | 23.1798457569169 | 0 | 0 |
| 383 | 8  | 53.7357973990418 | 26.938739663444  | 0 | 0 |
| 383 | 9  | 56.8432580424367 | 24.4328103924259 | 0 | 0 |
| 383 | 10 | 58.3107460643395 | 24.2761898129873 | 0 | 1 |
| 384 | 1  | 35.5783709787817 | 23.2443478649388 | 0 | 0 |
| 384 | 2  | 47.1622176591376 | 25.3966022968776 | 0 | 0 |
| 384 | 3  | 52.2464065708419 | 26.9749222136327 | 0 | 1 |



|     |    |                  |                  |   |   |
|-----|----|------------------|------------------|---|---|
| 384 | 4  | 55.27446954141   | 28.4097585015918 | 0 | 0 |
| 384 | 5  | 57.8316221765914 | 29.1271766455714 | 0 | 1 |
| 384 | 6  | 61.0841889117043 | 29.2706602743673 | 0 | 0 |
| 384 | 7  | 63.8439425051335 | 29.5576275319592 | 0 | 0 |
| 384 | 8  | 67.3702943189596 | 28.8402093879796 | 0 | 1 |
| 384 | 9  | 69.9767282683094 | 29.5576275319592 | 0 | 1 |
| 384 | 10 | 72.8514715947981 | 25.9705368120612 | 0 | 1 |
| 385 | 1  | 28.5859000684463 | 26.2479384944    | 0 | 0 |
| 385 | 2  | 37.9219712525667 | 29.3726930770667 | 0 | 0 |
| 385 | 3  | 42.0835044490075 | 30.2476243602133 | 0 | 0 |
| 385 | 4  | 44.6707734428474 | 30.6225949101333 | 0 | 1 |
| 385 | 5  | 46.92128678987   | 29.9976439936    | 0 | 0 |
| 385 | 6  | 49.7330595482546 | 29.3726930770667 | 0 | 1 |
| 385 | 7  | 52.684462696783  | 28.7477421605333 | 0 | 0 |
| 385 | 8  | 55.7180013689254 | 30.4976047268267 | 0 | 0 |
| 385 | 9  | 59.8795345653662 | 31.2475458266667 | 0 | 1 |
| 385 | 10 | 60.2573579739904 | 31.7475065598933 | 0 | 1 |
| 386 | 1  | 24.2819986310746 | 18.2706092688157 | 0 | 0 |
| 386 | 2  | 27.1676933607118 | 19.5258419666733 | 0 | 0 |
| 386 | 3  | 27.3483915126626 | 19.5258419666733 | 0 | 0 |
| 386 | 4  | 30.1245722108145 | 19.3863716669113 | 0 | 0 |
| 386 | 5  | 30.8309377138946 | 20.0837231657211 | 0 | 0 |
| 386 | 6  | 31.0006844626968 | 20.0837231657211 | 0 | 0 |
| 386 | 7  | 37.1690622861054 | 20.223193465483  | 0 | 0 |
| 386 | 8  | 41.0869267624914 | 20.223193465483  | 0 | 0 |
| 386 | 9  | 44.2518822724162 | 19.5258419666733 | 0 | 0 |
| 386 | 10 | 47.0855578370979 | 19.5258419666733 | 0 | 1 |
| 387 | 1  | 34.2395619438741 | 28.191704298953  | 0 | 0 |
| 387 | 2  | 37.160848733744  | 28.191704298953  | 0 | 0 |
| 387 | 3  | 40.1341546885695 | 26.1556367662508 | 0 | 0 |
| 387 | 4  | 43.0006844626968 | 24.7460515513032 | 0 | 0 |
| 387 | 5  | 45.8316221765914 | 25.5291544484963 | 0 | 0 |
| 387 | 6  | 48.7939767282683 | 25.5291544484963 | 0 | 0 |
| 387 | 7  | 50.7488021902806 | 25.8423956073736 | 0 | 1 |
| 387 | 8  | 51.1813826146475 | 25.8423956073736 | 0 | 1 |
| 387 | 9  | 52.3011635865845 | 25.8423956073736 | 0 | 0 |
| 387 | 10 | 52.7802874743326 | 26.6254985045667 | 0 | 0 |
| 388 | 1  | 24.249144421629  | 21.7573667628645 | 0 | 0 |
| 388 | 2  | 25.3169062286105 | 21.1994855638167 | 0 | 0 |
| 388 | 3  | 26.2778918548939 | 21.8968370626265 | 0 | 0 |
| 388 | 4  | 32               | 22.8731291609601 | 0 | 0 |
| 388 | 5  | 35.0800821355236 | 24.8257133576275 | 0 | 0 |
| 388 | 6  | 38.9075975359343 | 25.8020054559611 | 0 | 0 |
| 388 | 7  | 40.5859000684463 | 24.8257133576275 | 0 | 0 |
| 388 | 8  | 42.4750171115674 | 25.2441242569133 | 0 | 0 |
| 388 | 9  | 44.5229295003422 | 26.220416355247  | 0 | 0 |
| 388 | 10 | 44.6680355920602 | 25.8020054559611 | 0 | 0 |
| 390 | 1  | 37.5879534565366 | 30.3843924110938 | 0 | 1 |
| 390 | 2  | 37.845311430527  | 29.7579100933393 | 0 | 1 |
| 390 | 3  | 38.3682409308693 | 32.1072187849187 | 0 | 0 |
| 390 | 4  | 38.5598904859685 | 30.2277718316552 | 0 | 0 |
| 390 | 5  | 39.2635181382615 | 31.3241158877256 | 0 | 1 |
| 390 | 6  | 39.7125256673511 | 31.6373570466028 | 0 | 1 |
| 390 | 7  | 40.1943874058864 | 30.8542541494097 | 0 | 1 |

|     |    |                  |                  |   |   |
|-----|----|------------------|------------------|---|---|
| 390 | 8  | 41.0102669404517 | 31.6373570466028 | 0 | 1 |
| 390 | 9  | 41.4893908281999 | 29.9145306727779 | 0 | 1 |
| 390 | 10 | 41.5277207392197 | 30.8542541494097 | 0 | 1 |
| 391 | 1  | 34.0013689253936 | 26.7604414951557 | 1 | 1 |
| 391 | 2  | 34.8555783709788 | 26.0002016799524 | 1 | 1 |
| 391 | 3  | 37.0841889117043 | 27.6727292733997 | 1 | 1 |
| 391 | 4  | 45.8343600273785 | 27.064537421237  | 1 | 1 |
| 391 | 5  | 46.2833675564682 | 26.7604414951557 | 1 | 1 |
| 391 | 6  | 49.9219712525667 | 26.1522496429931 | 1 | 1 |
| 391 | 7  | 52.5886379192334 | 26.7604414951557 | 1 | 0 |
| 391 | 8  | 55.5044490075291 | 29.0411609407656 | 1 | 1 |
| 391 | 9  | 55.750855578371  | 27.8247772364403 | 1 | 0 |
| 391 | 10 | 56.8459958932238 | 29.4973048298875 | 1 | 1 |
| 392 | 1  | 29.3360711841205 | 28.191704298953  | 0 | 0 |
| 392 | 2  | 37.9739904175222 | 28.5049454578302 | 0 | 1 |
| 392 | 3  | 39.3347022587269 | 28.191704298953  | 0 | 0 |
| 392 | 4  | 41.347022587269  | 29.2880483550234 | 0 | 0 |
| 392 | 5  | 42.6639288158795 | 27.4086014017599 | 0 | 1 |
| 392 | 6  | 46.2505133470226 | 28.191704298953  | 0 | 1 |
| 392 | 7  | 48.3011635865845 | 29.2880483550234 | 0 | 1 |
| 392 | 8  | 51.3867214236824 | 28.9748071961461 | 0 | 1 |
| 392 | 9  | 54.7186858316222 | 28.191704298953  | 0 | 1 |
| 392 | 10 | 56.9856262833676 | 28.9748071961461 | 0 | 1 |
| 393 | 1  | 25.8316221765914 | 21.3731102529931 | 0 | 0 |
| 393 | 2  | 26.321697467488  | 20.1857152389379 | 0 | 0 |
| 393 | 3  | 27.0965092402464 | 21.1092446943141 | 0 | 0 |
| 393 | 4  | 27.8740588637919 | 22.4285724877088 | 0 | 0 |
| 393 | 5  | 29.0376454483231 | 21.7689085910114 | 0 | 0 |
| 393 | 6  | 30.3080082135524 | 22.1647069290298 | 0 | 0 |
| 393 | 7  | 30.5954825462012 | 22.1647069290298 | 0 | 0 |
| 393 | 8  | 30.9979466119097 | 22.1647069290298 | 0 | 0 |
| 393 | 9  | 33.0020533880903 | 22.1647069290298 | 0 | 0 |
| 393 | 10 | 34.0369609856263 | 24.0117658397823 | 0 | 0 |
| 394 | 1  | 28.2026009582478 | 26.3122573456895 | 0 | 0 |
| 394 | 2  | 30.3326488706366 | 25.9990161868122 | 0 | 0 |
| 394 | 3  | 34.3326488706366 | 25.8423956073736 | 0 | 0 |
| 394 | 4  | 37.7029431895962 | 25.5291544484963 | 0 | 0 |
| 394 | 5  | 40.5037645448323 | 24.7460515513032 | 0 | 0 |
| 394 | 6  | 42.9404517453799 | 24.7460515513032 | 0 | 0 |
| 394 | 7  | 43.4743326488706 | 24.4328103924259 | 0 | 0 |
| 394 | 8  | 44.9226557152635 | 24.7460515513032 | 0 | 0 |
| 394 | 9  | 46.9103353867214 | 22.709984018601  | 0 | 0 |
| 394 | 10 | 47.8357289527721 | 23.96294865411   | 0 | 0 |
| 396 | 1  | 28.0383299110199 | 23.6747987513265 | 0 | 0 |
| 396 | 2  | 30.7515400410678 | 22.6704133497551 | 0 | 0 |
| 396 | 3  | 32.6461327857632 | 23.6747987513265 | 0 | 0 |
| 396 | 4  | 33.5496235455168 | 24.535700524102  | 0 | 0 |
| 396 | 5  | 35.917864476386  | 25.1096350392857 | 0 | 0 |
| 396 | 6  | 35.9945242984257 | 24.8226677816939 | 0 | 0 |
| 396 | 7  | 36.5284052019165 | 24.679184152898  | 0 | 0 |
| 396 | 8  | 39.4989733059548 | 26.400987698449  | 0 | 0 |
| 396 | 9  | 43.170431211499  | 26.2575040696531 | 0 | 0 |
| 396 | 10 | 46.5817932922656 | 26.8314385848367 | 0 | 0 |
| 397 | 1  | 28.4188911704312 | 21.970930659375  | 0 | 0 |

|     |    |                  |                  |   |   |
|-----|----|------------------|------------------|---|---|
| 397 | 2  | 30.1327857631759 | 23.3271609469907 | 0 | 0 |
| 397 | 3  | 32.9144421629021 | 24.9546372921296 | 0 | 0 |
| 397 | 4  | 36.3778234086242 | 25.3615063784144 | 0 | 0 |
| 397 | 5  | 39.4168377823409 | 27.1246057523148 | 0 | 0 |
| 397 | 6  | 42.4284736481862 | 26.7177366660301 | 0 | 0 |
| 397 | 7  | 44.4188911704312 | 27.395851809838  | 0 | 0 |
| 397 | 8  | 46.4312114989733 | 27.395851809838  | 0 | 0 |
| 397 | 9  | 47.4332648870637 | 27.8027208961227 | 0 | 0 |
| 397 | 10 | 47.9151266255989 | 27.2602287810764 | 0 | 0 |
| 398 | 1  | 28.8459958932238 | 22.3152479619123 | 0 | 0 |
| 398 | 2  | 29.3360711841205 | 21.6178964631026 | 0 | 0 |
| 398 | 3  | 29.8918548939083 | 22.5941885614362 | 0 | 0 |
| 398 | 4  | 30.4996577686516 | 21.6178964631026 | 0 | 0 |
| 398 | 5  | 31.0910335386721 | 21.1994855638167 | 0 | 0 |
| 398 | 6  | 31.7481177275838 | 21.3389558635787 | 0 | 0 |
| 398 | 7  | 34.1683778234086 | 23.4310103600079 | 0 | 0 |
| 398 | 8  | 35.1759069130732 | 23.5704806597699 | 0 | 0 |
| 398 | 9  | 35.7672826830938 | 23.291540060246  | 0 | 0 |
| 398 | 10 | 37.9548254620123 | 22.7336588611982 | 0 | 0 |
| 399 | 1  | 24.498288843258  | 18.0789372282857 | 0 | 0 |
| 399 | 2  | 24.7310061601643 | 18.0789372282857 | 0 | 0 |
| 399 | 3  | 27.5126625598905 | 18.0789372282857 | 0 | 0 |
| 399 | 4  | 29.4127310061602 | 17.648486341898  | 0 | 0 |
| 399 | 5  | 31.2854209445585 | 18.6528717434694 | 0 | 0 |
| 399 | 6  | 32.621492128679  | 18.6528717434694 | 0 | 0 |
| 399 | 7  | 36.0793976728268 | 19.0833226298571 | 0 | 0 |
| 399 | 8  | 41.3305954825462 | 18.6528717434694 | 0 | 0 |
| 399 | 9  | 43.9151266255989 | 20.6616425466122 | 0 | 0 |
| 399 | 10 | 46.3299110198494 | 20.6616425466122 | 0 | 0 |
| 400 | 1  | 25.1663244353183 | 22.7415976243226 | 0 | 0 |
| 400 | 2  | 25.347022587269  | 22.7415976243226 | 0 | 0 |
| 400 | 3  | 26.8172484599589 | 22.2985794887839 | 0 | 0 |
| 400 | 4  | 29.5003422313484 | 21.5602159295526 | 0 | 0 |
| 400 | 5  | 29.5605749486653 | 21.5602159295526 | 0 | 0 |
| 400 | 6  | 31.895961670089  | 21.5602159295526 | 0 | 0 |
| 400 | 7  | 32.5065023956194 | 21.4125432177064 | 0 | 0 |
| 400 | 8  | 34.6666666666667 | 21.7078886413989 | 0 | 0 |
| 400 | 9  | 36.7008898015058 | 21.2648705058601 | 0 | 0 |
| 400 | 10 | 38.4996577686516 | 22.7415976243226 | 0 | 0 |
| 401 | 1  | 32.331279945243  | 23.7523574695946 | 0 | 0 |
| 401 | 2  | 34.1711156741958 | 23.7523574695946 | 0 | 0 |
| 401 | 3  | 36.0164271047228 | 23.1104018623083 | 0 | 0 |
| 401 | 4  | 37.9110198494182 | 23.6239663481373 | 0 | 0 |
| 401 | 5  | 38.9185489390828 | 23.1104018623083 | 0 | 0 |
| 401 | 6  | 39.9260780287474 | 23.1104018623083 | 0 | 0 |
| 401 | 7  | 41.8918548939083 | 23.3671841052228 | 0 | 0 |
| 401 | 8  | 45.0020533880903 | 24.5227041983382 | 0 | 0 |
| 401 | 9  | 47.0444900752909 | 24.7794864412527 | 0 | 0 |
| 401 | 10 | 49.0020533880903 | 24.1375308339664 | 0 | 0 |
| 403 | 1  | 22.5434633812457 | 20.820937043595  | 0 | 0 |
| 403 | 2  | 31.0006844626968 | 20.659534430854  | 0 | 0 |
| 403 | 3  | 31.7481177275838 | 21.4665474945592 | 0 | 0 |
| 403 | 4  | 32.4818617385353 | 20.9823396563361 | 0 | 0 |
| 403 | 5  | 33.2128678986995 | 20.9823396563361 | 0 | 0 |

|     |    |                  |                  |   |   |
|-----|----|------------------|------------------|---|---|
| 403 | 6  | 34.2149212867899 | 21.7893527200413 | 0 | 0 |
| 403 | 7  | 37.6728268309377 | 22.2735605582645 | 0 | 0 |
| 403 | 8  | 41.0869267624914 | 24.210391911157  | 0 | 0 |
| 403 | 9  | 43.7453798767967 | 24.3717945238981 | 0 | 0 |
| 403 | 10 | 45.8398357289528 | 23.4033788474518 | 0 | 0 |
| 404 | 1  | 30.5051334702259 | 22.4285724877088 | 0 | 0 |
| 404 | 2  | 37.5030800821355 | 21.9008413703509 | 0 | 0 |
| 404 | 3  | 38.3490759753593 | 20.9773119149747 | 0 | 0 |
| 404 | 4  | 42.3874058863792 | 21.636975811672  | 0 | 0 |
| 404 | 5  | 42.7515400410678 | 21.1092446943141 | 0 | 0 |
| 404 | 6  | 44.9911019849418 | 21.7689085910114 | 0 | 0 |
| 404 | 7  | 48.4188911704312 | 22.0327741496904 | 0 | 0 |
| 404 | 8  | 49.2539356605065 | 21.2411774736536 | 0 | 0 |
| 404 | 9  | 50.2313483915127 | 21.7689085910114 | 0 | 0 |
| 404 | 10 | 51.2087611225188 | 19.7899169009195 | 0 | 0 |
| 405 | 1  | 33.574264202601  | 23.6747987513265 | 0 | 0 |
| 405 | 2  | 42.3326488706366 | 24.3922168953061 | 0 | 0 |
| 405 | 3  | 46.4175222450376 | 25.5400859256735 | 0 | 0 |
| 405 | 4  | 48.5338809034908 | 24.3922168953061 | 0 | 0 |
| 405 | 5  | 48.5831622176591 | 24.3922168953061 | 0 | 0 |
| 405 | 6  | 52.2518822724162 | 25.2531186680816 | 0 | 1 |
| 405 | 7  | 53.4483230663929 | 24.3922168953061 | 0 | 0 |
| 405 | 8  | 54.54893908282   | 25.5400859256735 | 0 | 0 |
| 405 | 9  | 55.5838466803559 | 26.1140204408571 | 0 | 0 |
| 405 | 10 | 58.8364134154689 | 24.1052496377143 | 0 | 1 |
| 406 | 1  | 36.1615331964408 | 22.5186823932652 | 0 | 0 |
| 406 | 2  | 42.7460643394935 | 22.5186823932652 | 0 | 0 |
| 406 | 3  | 47.4113620807666 | 23.1272954309211 | 0 | 0 |
| 406 | 4  | 51.0773442847365 | 23.1272954309211 | 0 | 0 |
| 406 | 5  | 53.9137577002053 | 21.3014563179536 | 0 | 0 |
| 406 | 6  | 57.4948665297741 | 21.1797337104224 | 0 | 0 |
| 406 | 7  | 59.7234770704997 | 20.9362884953601 | 0 | 1 |
| 406 | 8  | 63.9206023271732 | 20.3276754577043 | 0 | 0 |
| 406 | 9  | 66.9760438056126 | 19.7190624200485 | 0 | 0 |
| 406 | 10 | 70.5927446954141 | 18.5018363447368 | 0 | 1 |
| 407 | 1  | 26.6694045174538 | 21.6660279481837 | 0 | 0 |
| 407 | 2  | 28.580424366872  | 22.6704133497551 | 0 | 0 |
| 407 | 3  | 30.6173853524983 | 22.813896978551  | 0 | 0 |
| 407 | 4  | 32.8323066392882 | 22.6704133497551 | 0 | 0 |
| 407 | 5  | 34.8501026694045 | 22.813896978551  | 0 | 0 |
| 407 | 6  | 36.788501026694  | 23.5313151225306 | 0 | 0 |
| 407 | 7  | 38.9158110882957 | 24.2487332665102 | 0 | 0 |
| 407 | 8  | 40.9774127310062 | 22.813896978551  | 0 | 0 |
| 407 | 9  | 43.0006844626968 | 23.1008642361429 | 0 | 0 |
| 407 | 10 | 44.9719370294319 | 23.5313151225306 | 0 | 0 |
| 408 | 1  | 27.0828199863107 | 25.3835945566753 | 0 | 0 |
| 408 | 2  | 29.0184804928131 | 26.3598866550089 | 0 | 0 |
| 408 | 3  | 29.09787816564   | 26.3598866550089 | 0 | 0 |
| 408 | 4  | 31.0088980150582 | 26.6388272545328 | 0 | 0 |
| 408 | 5  | 32.4188911704312 | 27.8940599523904 | 0 | 0 |
| 408 | 6  | 32.9418206707734 | 25.2441242569133 | 0 | 0 |
| 408 | 7  | 34.8555783709788 | 25.9414757557231 | 0 | 0 |
| 408 | 8  | 35.3730321697468 | 26.9177678540567 | 0 | 0 |
| 408 | 9  | 37.2511978097194 | 25.9414757557231 | 0 | 0 |

|     |    |                  |                  |   |   |
|-----|----|------------------|------------------|---|---|
| 408 | 10 | 40.2135523613963 | 27.7545896526284 | 0 | 0 |
| 409 | 1  | 27.2470910335387 | 23.5674342713019 | 1 | 0 |
| 409 | 2  | 34.5817932922656 | 25.2399618647491 | 1 | 0 |
| 409 | 3  | 39.6659822039699 | 26.6083935321151 | 1 | 0 |
| 409 | 4  | 43.917864476386  | 27.2165853842777 | 1 | 0 |
| 409 | 5  | 45.9164955509925 | 27.976825199481  | 1 | 0 |
| 409 | 6  | 49.864476386037  | 28.2809211255623 | 1 | 0 |
| 409 | 7  | 52.684462696783  | 24.6317700125865 | 1 | 0 |
| 409 | 8  | 61.8672142368241 | 28.7370650146843 | 1 | 0 |
| 409 | 9  | 70.1327857631759 | 32.6903120537414 | 1 | 0 |
| 409 | 10 | 78.7679671457906 | 30.2575446450908 | 1 | 0 |
| 410 | 1  | 34.2532511978097 | 23.4930869157942 | 1 | 0 |
| 410 | 2  | 34.7898699520876 | 24.4328103924259 | 1 | 0 |
| 410 | 3  | 38.8336755646817 | 23.96294865411   | 1 | 0 |
| 410 | 4  | 41.1772758384668 | 23.3364663363555 | 1 | 0 |
| 410 | 5  | 41.864476386037  | 24.5894309718646 | 1 | 0 |
| 410 | 6  | 46.2532511978097 | 23.4930869157942 | 1 | 0 |
| 410 | 7  | 47.8028747433265 | 25.0592927101804 | 1 | 0 |
| 410 | 8  | 50.6721423682409 | 25.5291544484963 | 1 | 0 |
| 410 | 9  | 53.6728268309377 | 25.3725338690577 | 1 | 0 |
| 410 | 10 | 56.580424366872  | 24.2761898129873 | 1 | 0 |
| 411 | 1  | 35.1676933607118 | 22.1065536881366 | 0 | 0 |
| 411 | 2  | 36.9965776865161 | 25.3615063784144 | 0 | 0 |
| 411 | 3  | 38.6721423682409 | 26.3108675797454 | 0 | 0 |
| 411 | 4  | 40.4188911704312 | 25.7683754646991 | 0 | 0 |
| 411 | 5  | 40.5229295003422 | 25.0902603208912 | 0 | 0 |
| 411 | 6  | 43.7481177275838 | 26.5821136372685 | 0 | 0 |
| 411 | 7  | 46.7652292950034 | 26.8533596947917 | 0 | 0 |
| 411 | 8  | 48.5831622176591 | 26.4464906085069 | 0 | 0 |
| 411 | 9  | 50.7679671457906 | 27.395851809838  | 0 | 0 |
| 411 | 10 | 52.5831622176591 | 27.1246057523148 | 0 | 0 |
| 412 | 1  | 23.0910335386721 | 21.6178964631026 | 0 | 0 |
| 412 | 2  | 30.6694045174538 | 25.2441242569133 | 0 | 0 |
| 412 | 3  | 35.2525667351129 | 23.9888915590557 | 0 | 0 |
| 412 | 4  | 39.5044490075291 | 25.1046539571514 | 0 | 1 |
| 412 | 5  | 42.6173853524983 | 27.0572381538187 | 0 | 0 |
| 412 | 6  | 44.2518822724162 | 24.5467727581036 | 0 | 1 |
| 412 | 7  | 46.9568788501027 | 25.5230648564372 | 0 | 1 |
| 412 | 8  | 49.3415468856947 | 24.6862430578655 | 0 | 1 |
| 412 | 9  | 52.7091033538672 | 27.8940599523904 | 0 | 0 |
| 412 | 10 | 54.3791923340178 | 25.8020054559611 | 0 | 0 |
| 413 | 1  | 21.845311430527  | 21.4125432177064 | 0 | 0 |
| 413 | 2  | 26.6666666666667 | 21.8555613532451 | 0 | 0 |
| 413 | 3  | 28.5859000684463 | 23.6276338954001 | 0 | 0 |
| 413 | 4  | 30.2012320328542 | 22.8892703361689 | 0 | 0 |
| 413 | 5  | 30.2970568104038 | 22.8892703361689 | 0 | 0 |
| 413 | 6  | 30.694045174538  | 22.1509067769376 | 0 | 0 |
| 413 | 7  | 31.1950718685832 | 22.7415976243226 | 0 | 0 |
| 413 | 8  | 31.6659822039699 | 22.2985794887839 | 0 | 0 |
| 413 | 9  | 32.2984257357974 | 24.8090155901701 | 0 | 0 |
| 413 | 10 | 32.8021902806297 | 25.5473791494014 | 0 | 0 |
| 414 | 1  | 38.2012320328542 | 23.3878314937347 | 0 | 0 |
| 414 | 2  | 43.4989733059548 | 23.2443478649388 | 0 | 0 |
| 414 | 3  | 49.6673511293634 | 23.2443478649388 | 0 | 0 |

|     |    |                  |                  |   |   |
|-----|----|------------------|------------------|---|---|
| 414 | 4  | 54.7488021902806 | 23.3878314937347 | 0 | 0 |
| 414 | 5  | 57.5003422313484 | 23.3878314937347 | 0 | 0 |
| 414 | 6  | 60.2518822724162 | 22.6704133497551 | 0 | 0 |
| 414 | 7  | 63.1676933607118 | 22.9573806073469 | 0 | 0 |
| 414 | 8  | 66.4832306639288 | 22.2399624633673 | 0 | 0 |
| 414 | 9  | 69.1526351813826 | 22.2399624633673 | 0 | 0 |
| 414 | 10 | 75.315537303217  | 22.3834460921633 | 0 | 0 |
| 415 | 1  | 27.0280629705681 | 21.7702605419693 | 0 | 0 |
| 415 | 2  | 32.8350444900753 | 22.8666045980397 | 0 | 0 |
| 415 | 3  | 33.3963039014374 | 21.9268811214079 | 0 | 0 |
| 415 | 4  | 36.7310061601643 | 23.3364663363555 | 0 | 0 |
| 415 | 5  | 37.9164955509925 | 23.6497074952328 | 0 | 0 |
| 415 | 6  | 41.2539356605065 | 24.4328103924259 | 0 | 0 |
| 415 | 7  | 44.3586584531143 | 24.2761898129873 | 0 | 0 |
| 415 | 8  | 47.0828199863107 | 23.6497074952328 | 0 | 0 |
| 415 | 9  | 50.1683778234086 | 23.4930869157942 | 0 | 0 |
| 415 | 10 | 53.2183436002738 | 23.96294865411   | 0 | 0 |
| 416 | 1  | 25.4893908281999 | 20.8051261754082 | 0 | 0 |
| 416 | 2  | 32               | 20.8051261754082 | 0 | 0 |
| 416 | 3  | 38.2477754962355 | 22.3834460921633 | 0 | 0 |
| 416 | 4  | 42.8364134154689 | 25.3966022968776 | 0 | 0 |
| 416 | 5  | 45.8562628336756 | 24.1052496377143 | 0 | 0 |
| 416 | 6  | 48.5859000684463 | 24.679184152898  | 0 | 0 |
| 416 | 7  | 51.6878850102669 | 24.535700524102  | 0 | 0 |
| 416 | 8  | 54.757015742642  | 22.2399624633673 | 0 | 0 |
| 416 | 9  | 56.8952772073922 | 23.5313151225306 | 0 | 0 |
| 416 | 10 | 56.9034907597536 | 23.5313151225306 | 0 | 0 |
| 417 | 1  | 26.3353867214237 | 25.3725338690577 | 0 | 0 |
| 417 | 2  | 30.0041067761807 | 28.0350837195144 | 0 | 0 |
| 417 | 3  | 31.2498288843258 | 27.4086014017599 | 0 | 0 |
| 417 | 4  | 35.2498288843258 | 28.191704298953  | 0 | 0 |
| 417 | 5  | 40.7392197125257 | 27.5652219811985 | 0 | 0 |
| 417 | 6  | 43.2498288843258 | 27.8784631400757 | 0 | 0 |
| 417 | 7  | 45.2484599589322 | 26.6254985045667 | 0 | 0 |
| 417 | 8  | 46.7542778918549 | 27.4086014017599 | 0 | 0 |
| 417 | 9  | 47.2169746748802 | 27.4086014017599 | 0 | 0 |
| 417 | 10 | 50.2422997946612 | 27.7218425606371 | 0 | 0 |
| 418 | 1  | 30.7953456536619 | 22.6575222424805 | 0 | 0 |
| 418 | 2  | 37.6673511293634 | 23.0008180340332 | 0 | 0 |
| 418 | 3  | 42.9158110882957 | 22.1425785551514 | 0 | 0 |
| 418 | 4  | 47.9151266255989 | 22.1425785551514 | 0 | 0 |
| 418 | 5  | 51.2279260780287 | 23.859057512915  | 0 | 0 |
| 418 | 6  | 53.6673511293634 | 23.1724659298096 | 0 | 0 |
| 418 | 7  | 56.6680355920602 | 24.0307054086914 | 0 | 0 |
| 418 | 8  | 60.0492813141684 | 24.5456490960205 | 0 | 0 |
| 418 | 9  | 62.9514031485284 | 24.7172969917969 | 0 | 1 |
| 418 | 10 | 65.7987679671458 | 24.2023533044678 | 0 | 1 |
| 419 | 1  | 28.8323066392882 | 20.9871576447761 | 0 | 0 |
| 419 | 2  | 31.3347022587269 | 21.457019383092  | 0 | 0 |
| 419 | 3  | 36.9171800136893 | 23.0232251774783 | 0 | 0 |
| 419 | 4  | 41.5797399041752 | 23.0232251774783 | 0 | 0 |
| 419 | 5  | 44.498288843258  | 24.9026721307418 | 0 | 0 |
| 419 | 6  | 47.0828199863107 | 24.4328103924259 | 0 | 0 |
| 419 | 7  | 51.0417522245038 | 25.8423956073736 | 0 | 1 |

|     |    |                  |                  |   |   |
|-----|----|------------------|------------------|---|---|
| 419 | 8  | 53.3908281998631 | 25.685775027935  | 0 | 0 |
| 419 | 9  | 56.6735112936345 | 26.1556367662508 | 0 | 0 |
| 419 | 10 | 60.3422313483915 | 25.685775027935  | 0 | 1 |
| 421 | 1  | 35.1676933607118 | 31.0576735864005 | 0 | 0 |
| 421 | 2  | 35.1950718685832 | 29.5658202700231 | 0 | 0 |
| 421 | 3  | 36.2847364818617 | 31.193296615162  | 0 | 0 |
| 421 | 4  | 38.2642026009582 | 29.5658202700231 | 0 | 0 |
| 421 | 5  | 41.5852156057495 | 29.8370663275463 | 0 | 0 |
| 421 | 6  | 46.2532511978097 | 30.6508045001157 | 0 | 0 |
| 421 | 7  | 46.6776180698152 | 30.7864275288773 | 0 | 0 |
| 421 | 8  | 54.4202600958248 | 30.5151814713542 | 0 | 0 |
| 421 | 9  | 57.0814510609172 | 31.3289196439236 | 0 | 0 |
| 421 | 10 | 62.5106091718001 | 25.0902603208912 | 0 | 0 |
| 422 | 1  | 28.4188911704312 | 21.9268811214079 | 0 | 0 |
| 422 | 2  | 33.4182067077344 | 20.9871576447761 | 0 | 0 |
| 422 | 3  | 35.3839835728953 | 20.9871576447761 | 0 | 0 |
| 422 | 4  | 37.0814510609172 | 21.9268811214079 | 0 | 0 |
| 422 | 5  | 40.9144421629021 | 22.2401222802851 | 0 | 0 |
| 422 | 6  | 42.839151266256  | 22.8666045980397 | 0 | 0 |
| 422 | 7  | 44.9144421629021 | 22.709984018601  | 0 | 0 |
| 422 | 8  | 47.1649555099247 | 23.4930869157942 | 0 | 0 |
| 422 | 9  | 50.0533880903491 | 24.1195692335487 | 0 | 0 |
| 422 | 10 | 52.1067761806982 | 24.5894309718646 | 0 | 0 |
| 423 | 1  | 27.3292265571526 | 21.9008413703509 | 0 | 0 |
| 423 | 2  | 28.1806981519507 | 22.0327741496904 | 0 | 0 |
| 423 | 3  | 29.1362080766598 | 22.6924380463877 | 0 | 0 |
| 423 | 4  | 32.4134154688569 | 22.0327741496904 | 0 | 0 |
| 423 | 5  | 32.6105407255305 | 21.7689085910114 | 0 | 0 |
| 423 | 6  | 33.9739904175222 | 22.1647069290298 | 0 | 0 |
| 423 | 7  | 35.0828199863107 | 21.7689085910114 | 0 | 0 |
| 423 | 8  | 35.7891854893908 | 21.9008413703509 | 0 | 0 |
| 423 | 9  | 35.9233401779603 | 21.9008413703509 | 0 | 0 |
| 423 | 10 | 36.1889117043121 | 21.636975811672  | 0 | 0 |
| 424 | 1  | 29.8343600273785 | 21.9529952057755 | 0 | 0 |
| 424 | 2  | 31.4579055441478 | 22.2399624633673 | 0 | 0 |
| 424 | 3  | 36.4188911704312 | 24.679184152898  | 0 | 0 |
| 424 | 4  | 38.5872689938398 | 24.679184152898  | 0 | 0 |
| 424 | 5  | 43.9151266255989 | 25.6835695544694 | 0 | 0 |
| 424 | 6  | 47.419575633128  | 25.8270531832653 | 0 | 0 |
| 424 | 7  | 50.2559890485969 | 25.2531186680816 | 0 | 0 |
| 424 | 8  | 52.4271047227926 | 23.9617660089184 | 0 | 1 |
| 424 | 9  | 56.2053388090349 | 25.1096350392857 | 0 | 0 |
| 424 | 10 | 59.5099247091034 | 25.9705368120612 | 0 | 0 |
| 425 | 1  | 26.9185489390828 | 23.9888915590557 | 0 | 0 |
| 425 | 2  | 34.8336755646817 | 27.6151193528665 | 0 | 0 |
| 425 | 3  | 40.2518822724162 | 28.7308817509621 | 0 | 0 |
| 425 | 4  | 42.7515400410678 | 26.3598866550089 | 0 | 0 |
| 425 | 5  | 45.8343600273785 | 25.1046539571514 | 0 | 0 |
| 425 | 6  | 48.6652977412731 | 25.9414757557231 | 0 | 0 |
| 425 | 7  | 52.1943874058864 | 25.6625351561992 | 0 | 0 |
| 425 | 8  | 54.9322381930185 | 25.8020054559611 | 0 | 0 |
| 425 | 9  | 57.0814510609172 | 25.2441242569133 | 0 | 0 |
| 425 | 10 | 57.9247091033539 | 25.9414757557231 | 0 | 0 |
| 426 | 1  | 30.5653661875428 | 23.7099509595318 | 0 | 0 |

|     |    |                  |                  |   |   |
|-----|----|------------------|------------------|---|---|
| 426 | 2  | 40.5831622176591 | 24.2678321585796 | 0 | 0 |
| 426 | 3  | 40.6297056810404 | 24.2678321585796 | 0 | 0 |
| 426 | 4  | 41.1060917180014 | 23.5704806597699 | 0 | 0 |
| 426 | 5  | 41.5879534565366 | 24.1283618588177 | 0 | 0 |
| 426 | 6  | 42.0588637919233 | 24.4073024583416 | 0 | 0 |
| 426 | 7  | 42.5434633812457 | 24.6862430578655 | 0 | 0 |
| 426 | 8  | 43.0417522245038 | 24.5467727581036 | 0 | 0 |
| 426 | 9  | 43.5345653661875 | 23.7099509595318 | 0 | 0 |
| 426 | 10 | 44.0191649555099 | 24.4073024583416 | 0 | 0 |
| 427 | 1  | 31.0006844626968 | 21.7702605419693 | 0 | 0 |
| 427 | 2  | 33.7494866529774 | 23.0232251774783 | 0 | 0 |
| 427 | 3  | 39.4140999315537 | 22.0835017008465 | 0 | 0 |
| 427 | 4  | 44.4134154688569 | 22.8666045980397 | 0 | 0 |
| 427 | 5  | 47.6659822039699 | 22.709984018601  | 0 | 0 |
| 427 | 6  | 50.4996577686516 | 22.8666045980397 | 0 | 0 |
| 427 | 7  | 53.6563997262149 | 22.2401222802851 | 0 | 0 |
| 427 | 8  | 56.2409308692676 | 22.5533634391624 | 0 | 0 |
| 427 | 9  | 59.129363449692  | 22.3967428597238 | 0 | 0 |
| 427 | 10 | 61.9055441478439 | 23.0232251774783 | 0 | 0 |
| 428 | 1  | 28.6652977412731 | 23.4930869157942 | 1 | 0 |
| 428 | 2  | 38.0835044490075 | 23.4930869157942 | 1 | 0 |
| 428 | 3  | 42.6639288158795 | 23.4930869157942 | 1 | 0 |
| 428 | 4  | 45.4182067077344 | 23.0232251774783 | 1 | 0 |
| 428 | 5  | 47.6659822039699 | 24.1195692335487 | 1 | 0 |
| 428 | 6  | 50.9815195071869 | 24.1195692335487 | 1 | 1 |
| 428 | 7  | 54.3353867214237 | 23.0232251774783 | 1 | 1 |
| 428 | 8  | 56.3997262149213 | 23.6497074952328 | 1 | 0 |
| 428 | 9  | 57.741273100616  | 24.4328103924259 | 1 | 0 |
| 428 | 10 | 62.4339493497604 | 23.4930869157942 | 1 | 1 |
| 429 | 1  | 26.2094455852156 | 20.5172959064602 | 0 | 0 |
| 429 | 2  | 27.4140999315537 | 19.5775724298285 | 0 | 0 |
| 429 | 3  | 29.4346338124572 | 19.8908135887057 | 0 | 0 |
| 429 | 4  | 31.7481177275838 | 22.0835017008465 | 0 | 0 |
| 429 | 5  | 33.7932922655715 | 22.709984018601  | 0 | 0 |
| 429 | 6  | 36.208076659822  | 24.5894309718646 | 0 | 0 |
| 429 | 7  | 38.3299110198494 | 24.4328103924259 | 0 | 0 |
| 429 | 8  | 40.7529089664613 | 25.0592927101804 | 0 | 0 |
| 429 | 9  | 42.7488021902806 | 25.8423956073736 | 0 | 0 |
| 429 | 10 | 44.5448323066393 | 25.8423956073736 | 0 | 0 |
| 430 | 1  | 31.7344284736482 | 20.9695250821676 | 0 | 0 |
| 430 | 2  | 38.1629021218344 | 22.7415976243226 | 0 | 0 |
| 430 | 3  | 44.2464065708419 | 24.0706520309389 | 0 | 0 |
| 430 | 4  | 49.7467488021903 | 27.6147971152489 | 0 | 0 |
| 430 | 5  | 53.160848733744  | 26.5810881323251 | 0 | 0 |
| 430 | 6  | 56.4134154688569 | 25.1043610138626 | 0 | 1 |
| 430 | 7  | 60.0793976728268 | 23.6276338954001 | 0 | 0 |
| 430 | 8  | 62.7241615331964 | 24.0706520309389 | 0 | 0 |
| 430 | 9  | 72.7282683093771 | 23.6276338954001 | 0 | 0 |
| 430 | 10 | 72.952772073922  | 25.9903972849401 | 0 | 0 |
| 431 | 1  | 25.5030800821355 | 21.9507553327824 | 0 | 0 |
| 431 | 2  | 29.1882272416153 | 21.3051448818182 | 0 | 0 |
| 431 | 3  | 31.1649555099247 | 20.820937043595  | 0 | 0 |
| 431 | 4  | 32.2108145106092 | 20.820937043595  | 0 | 0 |
| 431 | 5  | 35.1649555099247 | 21.6279501073003 | 0 | 0 |



|     |    |                  |                  |   |   |
|-----|----|------------------|------------------|---|---|
| 431 | 6  | 38.1656399726215 | 21.1437422690771 | 0 | 0 |
| 431 | 7  | 41.7467488021903 | 20.820937043595  | 0 | 0 |
| 431 | 8  | 43.7563312799452 | 20.820937043595  | 0 | 0 |
| 431 | 9  | 45.7467488021903 | 21.7893527200413 | 0 | 0 |
| 431 | 10 | 47.7535934291581 | 21.1437422690771 | 0 | 0 |
| 432 | 1  | 25.5140314852841 | 22.4858743467041 | 1 | 0 |
| 432 | 2  | 32.8323066392882 | 26.6054238453369 | 1 | 0 |
| 432 | 3  | 39.5811088295688 | 24.0307054086914 | 1 | 0 |
| 432 | 4  | 41.7686516084873 | 24.7172969917969 | 1 | 0 |
| 432 | 5  | 42.1300479123888 | 24.7172969917969 | 1 | 0 |
| 432 | 6  | 42.9979466119097 | 25.0605927833496 | 1 | 0 |
| 432 | 7  | 44.0136892539357 | 26.0904801580078 | 1 | 0 |
| 432 | 8  | 45.2320328542094 | 26.4337759495605 | 1 | 0 |
| 432 | 9  | 46.2505133470226 | 24.8889448875732 | 1 | 0 |
| 432 | 10 | 46.8062970568104 | 25.0605927833496 | 1 | 0 |
| 433 | 1  | 24.5886379192334 | 21.092093433     | 0 | 0 |
| 433 | 2  | 26.8336755646817 | 19.5137735162449 | 0 | 0 |
| 433 | 3  | 28.662559890486  | 20.8051261754082 | 0 | 0 |
| 433 | 4  | 31.6659822039699 | 20.3746752890204 | 0 | 0 |
| 433 | 5  | 33.6071184120465 | 20.9486098042041 | 0 | 0 |
| 433 | 6  | 35.6112251882272 | 22.813896978551  | 0 | 0 |
| 433 | 7  | 37.6673511293634 | 24.3922168953061 | 0 | 0 |
| 433 | 8  | 39.6139630390144 | 24.9661514104898 | 0 | 0 |
| 433 | 9  | 41.6673511293634 | 25.5400859256735 | 0 | 0 |
| 433 | 10 | 43.6303901437372 | 25.9705368120612 | 0 | 0 |
| 434 | 1  | 42.7488021902806 | 25.6950518612476 | 1 | 0 |
| 434 | 2  | 49.0841889117043 | 27.1717789797101 | 1 | 0 |
| 434 | 3  | 53.9986310746064 | 27.0241062678639 | 1 | 1 |
| 434 | 4  | 57.3360711841205 | 26.5810881323251 | 1 | 1 |
| 434 | 5  | 60               | 26.2857427086326 | 1 | 0 |
| 434 | 6  | 62.9048596851472 | 27.3194516915564 | 1 | 1 |
| 434 | 7  | 65.8891170431211 | 26.5810881323251 | 1 | 1 |
| 434 | 8  | 69.0376454483231 | 25.6950518612476 | 1 | 0 |
| 434 | 9  | 74.7077344284736 | 26.4334154204789 | 1 | 1 |
| 434 | 10 | 81.8836413415469 | 25.8427245730939 | 1 | 1 |
| 435 | 1  | 28.4188911704312 | 22.3777997456597 | 0 | 0 |
| 435 | 2  | 31.4551676933607 | 23.5984070045139 | 0 | 0 |
| 435 | 3  | 32.0985626283368 | 24.0052760907986 | 0 | 0 |
| 435 | 4  | 33.9164955509925 | 24.9546372921296 | 0 | 0 |
| 435 | 5  | 38.0835044490075 | 25.4971294071759 | 0 | 0 |
| 435 | 6  | 42.0013689253936 | 25.0902603208912 | 0 | 0 |
| 435 | 7  | 44.7529089664613 | 23.869653062037  | 0 | 0 |
| 435 | 8  | 47.8384668035592 | 24.9546372921296 | 0 | 0 |
| 435 | 9  | 51.356605065024  | 24.1408991195602 | 0 | 1 |
| 435 | 10 | 53.8699520876112 | 25.4971294071759 | 0 | 0 |
| 436 | 1  | 26.2532511978097 | 23.5984070045139 | 0 | 0 |
| 436 | 2  | 29.305954825462  | 25.2258833496528 | 0 | 0 |
| 436 | 3  | 30.1930184804928 | 28.345213011169  | 0 | 0 |
| 436 | 4  | 31.1676933607118 | 30.6508045001157 | 0 | 0 |
| 436 | 5  | 32.3066392881588 | 26.3108675797454 | 0 | 0 |
| 436 | 6  | 32.7611225188227 | 26.0396215222222 | 0 | 0 |
| 436 | 7  | 35.2525667351129 | 27.6670978673611 | 0 | 0 |
| 436 | 8  | 38.4202600958248 | 25.7683754646991 | 0 | 0 |
| 436 | 9  | 42.5023956194387 | 28.6164590686921 | 0 | 0 |

|     |    |                  |                  |   |   |
|-----|----|------------------|------------------|---|---|
| 436 | 10 | 43.8767967145791 | 27.1246057523148 | 0 | 0 |
| 437 | 1  | 32.8323066392882 | 27.2907560000947 | 0 | 0 |
| 437 | 2  | 34.3353867214237 | 24.2954291220355 | 0 | 0 |
| 437 | 3  | 39.3347022587269 | 27.1243489513136 | 0 | 0 |
| 437 | 4  | 40.8323066392882 | 27.1243489513136 | 0 | 0 |
| 437 | 5  | 46.0835044490075 | 26.2923137074083 | 0 | 0 |
| 437 | 6  | 48.7501711156742 | 27.6235700976568 | 0 | 0 |
| 437 | 7  | 51.6659822039699 | 26.7915348537515 | 0 | 0 |
| 437 | 8  | 54.8008213552361 | 28.122791244     | 0 | 1 |
| 437 | 9  | 58.3901437371663 | 24.6282432195976 | 0 | 0 |
| 437 | 10 | 60.4709103353867 | 25.2938714147219 | 0 | 0 |
| 438 | 1  | 30.5379876796715 | 24.7460515513032 | 0 | 0 |
| 438 | 2  | 35.8329911019849 | 21.9268811214079 | 0 | 0 |
| 438 | 3  | 39.6714579055441 | 24.1195692335487 | 0 | 0 |
| 438 | 4  | 45.0869267624914 | 24.4328103924259 | 0 | 0 |
| 438 | 5  | 50.1683778234086 | 25.0592927101804 | 0 | 1 |
| 438 | 6  | 52.4188911704312 | 26.938739663444  | 0 | 0 |
| 438 | 7  | 54.9185489390828 | 27.2519808223212 | 0 | 0 |
| 438 | 8  | 56.9828884325804 | 25.3725338690577 | 0 | 0 |
| 438 | 9  | 58.9979466119097 | 26.3122573456895 | 0 | 0 |
| 438 | 10 | 60.9911019849418 | 27.2519808223212 | 0 | 0 |
| 439 | 1  | 42.8309377138946 | 25.1043610138626 | 1 | 0 |
| 439 | 2  | 48.9171800136893 | 26.5810881323251 | 1 | 0 |
| 439 | 3  | 53.4209445585216 | 25.1043610138626 | 1 | 1 |
| 439 | 4  | 56.5612594113621 | 25.9903972849401 | 1 | 1 |
| 439 | 5  | 59.2498288843258 | 26.7287608441714 | 1 | 1 |
| 439 | 6  | 62.7488021902806 | 24.8090155901701 | 1 | 0 |
| 439 | 7  | 65.3963039014374 | 26.4334154204789 | 1 | 0 |
| 439 | 8  | 68.3832991101985 | 24.9566883020164 | 1 | 1 |
| 439 | 9  | 74.4969199178645 | 25.3997064375551 | 1 | 1 |
| 439 | 10 | 80.6680355920602 | 24.3659974546314 | 1 | 0 |
| 440 | 1  | 34.6036960985626 | 27.2618894712245 | 0 | 0 |
| 440 | 2  | 35.7481177275838 | 27.2618894712245 | 0 | 0 |
| 440 | 3  | 35.9479808350445 | 27.1184058424286 | 0 | 0 |
| 440 | 4  | 36.848733744011  | 27.2618894712245 | 0 | 0 |
| 440 | 5  | 38.6995208761123 | 25.2531186680816 | 0 | 0 |
| 440 | 6  | 39.5318275154004 | 25.8270531832653 | 0 | 0 |
| 440 | 7  | 41.3278576317591 | 26.5444713272449 | 0 | 0 |
| 440 | 8  | 43.0171115674196 | 27.4053731000204 | 0 | 1 |
| 440 | 9  | 45.1663244353183 | 26.5444713272449 | 0 | 1 |
| 440 | 10 | 45.4127310061602 | 26.5444713272449 | 0 | 1 |
| 441 | 1  | 29.1909650924025 | 21.1437782242147 | 0 | 0 |
| 441 | 2  | 30.2532511978097 | 22.0835017008465 | 0 | 0 |
| 441 | 3  | 36.2518822724162 | 23.8063280746714 | 0 | 0 |
| 441 | 4  | 36.662559890486  | 24.1195692335487 | 0 | 0 |
| 441 | 5  | 41.7577002053388 | 24.2761898129873 | 0 | 0 |
| 441 | 6  | 45.0869267624914 | 25.9990161868122 | 0 | 0 |
| 441 | 7  | 47.6714579055441 | 27.0953602428826 | 0 | 0 |
| 441 | 8  | 50.6721423682409 | 26.1556367662508 | 0 | 0 |
| 441 | 9  | 53.7303216974675 | 26.4688779251281 | 0 | 0 |
| 441 | 10 | 57.2785763175907 | 27.4086014017599 | 0 | 0 |
| 442 | 1  | 28.9171800136893 | 27.7058836612873 | 0 | 0 |
| 442 | 2  | 35.501711156742  | 27.7058836612873 | 0 | 0 |
| 442 | 3  | 40.1670088980151 | 26.7823542059111 | 0 | 0 |

|     |    |                  |                  |   |   |
|-----|----|------------------|------------------|---|---|
| 442 | 4  | 44.2518822724162 | 25.7268919711953 | 0 | 0 |
| 442 | 5  | 46.3353867214237 | 22.6924380463877 | 0 | 0 |
| 442 | 6  | 49.1663244353183 | 22.9563036050666 | 0 | 0 |
| 442 | 7  | 51.6605065023956 | 22.4285724877088 | 0 | 0 |
| 442 | 8  | 54.9514031485284 | 23.0882363844061 | 0 | 0 |
| 442 | 9  | 58.0944558521561 | 22.4285724877088 | 0 | 0 |
| 442 | 10 | 59.2361396303901 | 22.4285724877088 | 0 | 0 |
| 443 | 1  | 33.0184804928131 | 22.9573806073469 | 0 | 0 |
| 443 | 2  | 43.6632443531828 | 24.1052496377143 | 0 | 0 |
| 443 | 3  | 44.1642710472279 | 23.8182823801224 | 0 | 0 |
| 443 | 4  | 44.6652977412731 | 25.1096350392857 | 0 | 0 |
| 443 | 5  | 45.1471594798084 | 26.2575040696531 | 0 | 0 |
| 443 | 6  | 45.6454483230664 | 25.1096350392857 | 0 | 0 |
| 443 | 7  | 46.1437371663244 | 25.3966022968776 | 0 | 0 |
| 443 | 8  | 46.6830937713895 | 25.1096350392857 | 0 | 0 |
| 443 | 9  | 47.2388774811773 | 24.3922168953061 | 0 | 0 |
| 443 | 10 | 47.6632443531828 | 26.9749222136327 | 0 | 0 |
| 444 | 1  | 28.7474332648871 | 25.5291544484963 | 0 | 0 |
| 444 | 2  | 33.9986310746064 | 26.6254985045667 | 0 | 0 |
| 444 | 3  | 39.0855578370979 | 27.8784631400757 | 0 | 0 |
| 444 | 4  | 42.1629021218344 | 27.5652219811985 | 0 | 0 |
| 444 | 5  | 45.9137577002053 | 25.685775027935  | 0 | 0 |
| 444 | 6  | 48.580424366872  | 27.4086014017599 | 0 | 0 |
| 444 | 7  | 51.5783709787817 | 26.938739663444  | 0 | 0 |
| 444 | 8  | 51.5865845311431 | 26.6254985045667 | 0 | 0 |
| 444 | 9  | 54.0123203285421 | 26.938739663444  | 0 | 0 |
| 444 | 10 | 60.1232032854209 | 28.5049454578302 | 0 | 0 |
| 445 | 1  | 20.9828884325804 | 22.8071944560986 | 0 | 0 |
| 445 | 2  | 28.1670088980151 | 23.5674342713019 | 0 | 0 |
| 445 | 3  | 30.652977412731  | 22.0469546408953 | 0 | 0 |
| 445 | 4  | 31.1676933607118 | 20.8305709365701 | 0 | 0 |
| 445 | 5  | 31.7344284736482 | 21.8949066778547 | 0 | 0 |
| 445 | 6  | 32.2245037645448 | 22.9592424191393 | 0 | 0 |
| 445 | 7  | 32.7091033538672 | 22.655146493058  | 0 | 0 |
| 445 | 8  | 33.1663244353183 | 22.199002603936  | 0 | 0 |
| 445 | 9  | 33.7084188911704 | 21.4387627887327 | 0 | 0 |
| 445 | 10 | 33.8918548939083 | 21.4387627887327 | 0 | 0 |
| 446 | 1  | 28.5859000684463 | 21.1092446943141 | 0 | 0 |
| 446 | 2  | 28.72553045859   | 20.4495807976168 | 0 | 0 |
| 446 | 3  | 34.2532511978097 | 22.4285724877088 | 0 | 0 |
| 446 | 4  | 35.0855578370979 | 21.5050430323325 | 0 | 0 |
| 446 | 5  | 35.9644079397673 | 22.0327741496904 | 0 | 0 |
| 446 | 6  | 38.0013689253936 | 23.0882363844061 | 0 | 0 |
| 446 | 7  | 39.2251882272416 | 23.7479002811034 | 0 | 0 |
| 446 | 8  | 40.0109514031485 | 23.4840347224245 | 0 | 0 |
| 446 | 9  | 40.3559206023272 | 24.2756313984613 | 0 | 0 |
| 446 | 10 | 41.8343600273785 | 24.6714297364796 | 0 | 0 |
| 447 | 1  | 32.0355920602327 | 25.1096350392857 | 0 | 0 |
| 447 | 2  | 33.2511978097194 | 25.8270531832653 | 0 | 0 |
| 447 | 3  | 38.5023956194387 | 26.9749222136327 | 0 | 0 |
| 447 | 4  | 43.5044490075291 | 26.5444713272449 | 0 | 0 |
| 447 | 5  | 46.6666666666667 | 27.2618894712245 | 0 | 1 |
| 447 | 6  | 50.3326488706366 | 27.6923403576122 | 0 | 0 |
| 447 | 7  | 53.1663244353183 | 25.8270531832653 | 0 | 0 |

|     |    |                  |                  |   |   |
|-----|----|------------------|------------------|---|---|
| 447 | 8  | 55.937029431896  | 27.2618894712245 | 0 | 0 |
| 447 | 9  | 58.8008213552361 | 26.400987698449  | 0 | 0 |
| 447 | 10 | 61.7275838466804 | 26.1140204408571 | 0 | 0 |
| 448 | 1  | 30.6338124572211 | 27.0241062678639 | 0 | 0 |
| 448 | 2  | 36.2436687200548 | 26.2857427086326 | 0 | 0 |
| 448 | 3  | 41.6646132785763 | 27.3194516915564 | 0 | 0 |
| 448 | 4  | 46.0013689253936 | 27.6147971152489 | 0 | 0 |
| 448 | 5  | 49.1800136892539 | 27.3194516915564 | 0 | 0 |
| 448 | 6  | 51.8302532511978 | 28.2054879626339 | 0 | 0 |
| 448 | 7  | 54.7488021902806 | 27.6147971152489 | 0 | 0 |
| 448 | 8  | 57.9958932238193 | 26.5810881323251 | 0 | 0 |
| 448 | 9  | 61.6180698151951 | 28.6485060981727 | 0 | 1 |
| 448 | 10 | 64.186173853525  | 26.1380699967864 | 0 | 0 |
| 451 | 1  | 39.917864476386  | 22.8071944560986 | 0 | 0 |
| 451 | 2  | 41.7330595482546 | 25.5440577908304 | 0 | 0 |
| 451 | 3  | 42.8446269678303 | 25.5440577908304 | 0 | 0 |
| 451 | 4  | 43.8713210130048 | 25.0879139017085 | 0 | 0 |
| 451 | 5  | 45.8343600273785 | 26.4563455690744 | 0 | 0 |
| 451 | 6  | 46.507871321013  | 23.8715301973832 | 0 | 0 |
| 451 | 7  | 46.9952087611225 | 25.6961057538711 | 0 | 0 |
| 451 | 8  | 48.2381930184805 | 25.2399618647491 | 0 | 0 |
| 451 | 9  | 49.3251197809719 | 26.3042976060337 | 0 | 0 |
| 451 | 10 | 50.3326488706366 | 25.6961057538711 | 0 | 0 |
| 453 | 1  | 37.1690622861054 | 26.5444713272449 | 0 | 0 |
| 453 | 2  | 44.8323066392882 | 27.8358239864082 | 0 | 0 |
| 453 | 3  | 49.1690622861054 | 26.5444713272449 | 0 | 0 |
| 453 | 4  | 51.9397672826831 | 26.400987698449  | 0 | 0 |
| 453 | 5  | 53.9986310746064 | 27.2618894712245 | 0 | 0 |
| 453 | 6  | 57.1690622861054 | 27.1184058424286 | 0 | 0 |
| 453 | 7  | 59.9671457905544 | 27.2618894712245 | 0 | 0 |
| 453 | 8  | 63.1129363449692 | 26.5444713272449 | 0 | 0 |
| 453 | 9  | 66.1464750171116 | 26.1140204408571 | 0 | 0 |
| 453 | 10 | 68.9171800136892 | 27.1184058424286 | 0 | 0 |
| 454 | 1  | 28.9171800136893 | 24.0091397125091 | 0 | 0 |
| 454 | 2  | 30.0396988364134 | 24.1375308339664 | 0 | 0 |
| 454 | 3  | 32.3203285420945 | 23.6239663481373 | 0 | 0 |
| 454 | 4  | 32.72553045859   | 23.7523574695946 | 0 | 0 |
| 454 | 5  | 34.4969199178645 | 24.1375308339664 | 0 | 1 |
| 454 | 6  | 36.1177275838467 | 24.6510953197955 | 0 | 0 |
| 454 | 7  | 36.6516084873374 | 24.0091397125091 | 0 | 0 |
| 454 | 8  | 38.6639288158795 | 24.6510953197955 | 0 | 0 |
| 454 | 9  | 40.7310061601643 | 24.2659219554237 | 0 | 0 |
| 454 | 10 | 42.7488021902806 | 25.5498331699963 | 0 | 0 |
| 455 | 1  | 22.2642026009582 | 21.6996846018519 | 0 | 0 |
| 455 | 2  | 26.8336755646817 | 23.0559148894676 | 0 | 0 |
| 455 | 3  | 27.7946611909651 | 25.0902603208912 | 0 | 0 |
| 455 | 4  | 28.4188911704312 | 23.869653062037  | 0 | 0 |
| 455 | 5  | 28.5366187542779 | 25.0902603208912 | 0 | 0 |
| 455 | 6  | 32.1697467488022 | 25.0902603208912 | 0 | 0 |
| 455 | 7  | 33.2375085557837 | 25.3615063784144 | 0 | 1 |
| 455 | 8  | 34.0917180013689 | 25.0902603208912 | 0 | 1 |
| 455 | 9  | 34.6803559206023 | 23.7340300332755 | 0 | 0 |
| 455 | 10 | 34.9650924024641 | 25.0902603208912 | 0 | 1 |
| 457 | 1  | 27.4962354551677 | 24.0235781604239 | 1 | 1 |

|     |    |                  |                  |   |   |
|-----|----|------------------|------------------|---|---|
| 457 | 2  | 30.2505133470226 | 25.0879139017085 | 1 | 0 |
| 457 | 3  | 36.7474332648871 | 28.8891129777249 | 1 | 0 |
| 457 | 4  | 41.5112936344969 | 28.4329690886029 | 1 | 1 |
| 457 | 5  | 45.9986310746064 | 27.976825199481  | 1 | 1 |
| 457 | 6  | 48.9993155373032 | 28.8891129777249 | 1 | 1 |
| 457 | 7  | 51.6167008898015 | 27.8247772364403 | 1 | 1 |
| 457 | 8  | 55.1649555099247 | 26.3042976060337 | 1 | 1 |
| 457 | 9  | 56.9582477754962 | 23.1112903821799 | 1 | 1 |
| 457 | 10 | 60.062970568104  | 20.3744270474481 | 1 | 0 |
| 458 | 1  | 35.6632443531828 | 29.1932089038062 | 0 | 0 |
| 458 | 2  | 36.6899383983573 | 26.6083935321151 | 0 | 0 |
| 458 | 3  | 39.4962354551677 | 24.1756261234645 | 0 | 0 |
| 458 | 4  | 43.8329911019849 | 25.8481537169118 | 0 | 0 |
| 458 | 5  | 48.062970568104  | 26.6083935321151 | 0 | 0 |
| 458 | 6  | 48.4955509924709 | 26.7604414951557 | 0 | 0 |
| 458 | 7  | 48.5886379192334 | 25.8481537169118 | 0 | 0 |
| 458 | 8  | 52               | 27.8247772364403 | 0 | 0 |
| 458 | 9  | 54.7488021902806 | 26.1522496429931 | 0 | 0 |
| 458 | 10 | 57.3935660506502 | 25.8481537169118 | 0 | 0 |
| 459 | 1  | 29.5030800821355 | 22.3152479619123 | 0 | 0 |
| 459 | 2  | 31.4743326488706 | 22.3152479619123 | 0 | 0 |
| 459 | 3  | 37.1690622861054 | 24.5467727581036 | 0 | 0 |
| 459 | 4  | 42.3353867214237 | 25.9414757557231 | 0 | 1 |
| 459 | 5  | 44.7501711156742 | 23.7099509595318 | 0 | 1 |
| 459 | 6  | 47.501711156742  | 25.8020054559611 | 0 | 0 |
| 459 | 7  | 51.0828199863107 | 25.8020054559611 | 0 | 1 |
| 459 | 8  | 53.9110198494182 | 26.6388272545328 | 0 | 0 |
| 459 | 9  | 56.6516084873374 | 27.4756490531045 | 0 | 0 |
| 459 | 10 | 59.6167008898015 | 25.6625351561992 | 0 | 0 |
| 461 | 1  | 37.1526351813826 | 27.7545896526284 | 0 | 0 |
| 461 | 2  | 39.4962354551677 | 27.4756490531045 | 0 | 1 |
| 461 | 3  | 41.7385352498289 | 27.8940599523904 | 0 | 1 |
| 461 | 4  | 44               | 27.8940599523904 | 0 | 1 |
| 461 | 5  | 46.0451745379877 | 27.6151193528665 | 0 | 1 |
| 461 | 6  | 47.9233401779603 | 26.6388272545328 | 0 | 0 |
| 461 | 7  | 49.9164955509925 | 28.7308817509621 | 0 | 1 |
| 461 | 8  | 51.3593429158111 | 28.5914114512002 | 0 | 1 |
| 461 | 9  | 53.3360711841205 | 29.009822350486  | 0 | 1 |
| 461 | 10 | 55.2498288843258 | 29.009822350486  | 0 | 1 |
| 462 | 1  | 28.3750855578371 | 20.6416043647689 | 0 | 0 |
| 462 | 2  | 33.5003422313484 | 21.8968370626265 | 0 | 0 |
| 462 | 3  | 37.0841889117043 | 22.5941885614362 | 0 | 0 |
| 462 | 4  | 37.5167693360712 | 22.4547182616743 | 0 | 0 |
| 462 | 5  | 38.3326488706366 | 24.4073024583416 | 0 | 0 |
| 462 | 6  | 39.006160164271  | 24.4073024583416 | 0 | 0 |
| 462 | 7  | 41.0732375085558 | 23.7099509595318 | 0 | 0 |
| 462 | 8  | 44.5010266940452 | 24.4073024583416 | 0 | 0 |
| 462 | 9  | 47.0992470910335 | 24.8257133576275 | 0 | 1 |
| 462 | 10 | 49.5003422313484 | 24.4073024583416 | 0 | 1 |
| 463 | 1  | 29.6646132785763 | 23.0125994607221 | 0 | 0 |
| 463 | 2  | 34.4120465434634 | 23.7099509595318 | 0 | 0 |
| 463 | 3  | 36.8815879534565 | 24.8257133576275 | 0 | 0 |
| 463 | 4  | 37.3689253935661 | 24.4073024583416 | 0 | 0 |
| 463 | 5  | 41.2457221081451 | 24.8257133576275 | 0 | 0 |

|     |    |                  |                  |   |   |
|-----|----|------------------|------------------|---|---|
| 463 | 6  | 43.6084873374401 | 24.4073024583416 | 0 | 0 |
| 463 | 7  | 44.580424366872  | 24.9651836573894 | 0 | 0 |
| 463 | 8  | 47.0773442847365 | 25.2441242569133 | 0 | 0 |
| 463 | 9  | 52.1615331964408 | 29.009822350486  | 0 | 1 |
| 463 | 10 | 55.62765229295   | 25.6625351561992 | 0 | 0 |
